# Supplementary material for: Transcriptome Sequence Analysis of the Defense Responses of Resistant and Susceptible Cucumber Strains to Podosphaera xanthii
Source: Front Plant Sci. 2022 May 12;13:872218. doi: 10.3389/fpls.2022.872218 (PMC9134894; doi:10.3389/fpls.2022.872218)
Supplement: Supplementary Table 3 — List of DEGs in S0h vs. R0h comparison. [file Table_3.XLSX]

## Sheet: Sheet1
id	baseMean	baseMean_S0h	baseMean_R0h	foldChange(R0h/S0h)(R0h/S0h)	log2FoldChange	pval	padj	Chromosome	Start Site	End Site	Direction	Length	Name	GO	KEGG	eggNOG	eggNOG Class	Swissprot	NR Description	BP	CC	MF	Pathway
CsGy3G002350	1372.53	216.685	2528.38	11.6685	3.54454	5.08387e-29	9.21045e-25	Chr3	1833303	1834337	+	1035	-	GO:0003677;GO:0003700;GO:0005634;GO:0006355;	K09286	virNOG21346	K	sp|Q8VZ91|EF103_ARATH Ethylene-responsive transcription factor 6 OS=Arabidopsis thaliana GN=ERF6 PE=2 SV=2	ethylene-responsive transcription factor 5	GO:0006355//regulation of transcription, DNA-templated;	GO:0005634//nucleus;	GO:0003677//DNA binding;GO:0003700//DNA-binding transcription factor activity;	-
CsGy4G024290	259.153	61.3782	456.928	7.44446	2.89617	6.71824e-20	4.05715e-16	Chr4	30102530	30102994	+	465	-	GO:0016021;	-	virNOG23670	S	sp|Q3E965|GDU5_ARATH Protein GLUTAMINE DUMPER 5 OS=Arabidopsis thaliana GN=GDU5 PE=2 SV=2	protein GLUTAMINE DUMPER 5-like	-	GO:0016021//integral component of membrane;	-	-
CsGy4G022770	263.424	79.7492	447.098	5.6063	2.48705	1.48838e-19	6.74125e-16	Chr4	29109847	29110638	+	792	-	GO:0000981;GO:0001135;GO:0005634;GO:0006357;GO:0030154;GO:0043565;GO:0044212;	K09422	virNOG09221	K	sp|Q9FDW1|MYB44_ARATH Transcription factor MYB44 OS=Arabidopsis thaliana GN=MYB44 PE=1 SV=1	transcription factor MYB44-like	GO:0006357//regulation of transcription by RNA polymerase II;GO:0030154//cell differentiation;	GO:0005634//nucleus;	GO:0000981//DNA-binding transcription factor activity, RNA polymerase II-specific;GO:0001135//obsolete RNA polymerase II transcription regulator recruiting activity;GO:0043565//sequence-specific DNA binding;	-
CsGy6G023580	102.606	18.3771	186.834	10.1667	3.34578	4.42109e-18	1.14424e-14	Chr6	23690694	23694022	-	2334	-	GO:0004672;GO:0005509;GO:0005524;GO:0006468;	K13412	virNOG01799	T	sp|Q42438|CDPK8_ARATH Calcium-dependent protein kinase 8 OS=Arabidopsis thaliana GN=CPK8 PE=1 SV=1	calcium-dependent protein kinase 8-like	GO:0006468//protein phosphorylation;	-	GO:0004672//protein kinase activity;GO:0005509//calcium ion binding;GO:0005524//ATP binding;	ko05145(Toxoplasmosis);ko04626(Plant-pathogen interaction)
CsGy3G012100	110.303	29.5323	191.074	6.47002	2.69377	6.05604e-11	5.7746e-08	Chr3	9199333	9201474	+	1790	-	GO:0004674;GO:0005524;GO:0006468;	K04515	virNOG03672	T	sp|Q9SPK4|PPCK1_ARATH Phosphoenolpyruvate carboxylase kinase 1 OS=Arabidopsis thaliana GN=PPCK1 PE=1 SV=1	Phosphoenolpyruvate carboxylase kinase 4	GO:0006468//protein phosphorylation;	-	GO:0004674//protein serine/threonine kinase activity;GO:0005524//ATP binding;	ko05417(Lipid and atherosclerosis);ko05415(Diabetic cardiomyopathy);ko05214(Glioma);ko05205(Proteoglycans in cancer);ko05200(Pathways in cancer);ko05152(Tuberculosis);ko05031(Amphetamine addiction);ko05022(Pathways of neurodegeneration - multiple diseases);ko05012(Parkinson disease);ko04971(Gastric acid secretion);ko04934(Cushing syndrome);ko04925(Aldosterone synthesis and secretion);ko04922(Gluc…
CsGy7G015460	252.306	50.7023	453.909	8.95244	3.16228	1.7666e-10	1.44806e-07	Chr7	19408414	19408874	-	357	-	-	K10144	-	-	-	Uncharacterized protein	-	-	-	ko05162(Measles);ko04120(Ubiquitin mediated proteolysis);ko04115(p53 signaling pathway)
CsGy7G013600	923.169	538.128	1308.21	2.43104	1.28157	3.67879e-10	2.77703e-07	Chr7	17699263	17700020	-	545	-	-	-	virNOG24842	R	sp|Q8W453|DIRL1_ARATH Putative lipid-transfer protein DIR1 OS=Arabidopsis thaliana GN=DIR1 PE=1 SV=1	putative lipid-transfer protein DIR1	-	-	-	-
CsGy6G005160	1201.32	704.739	1697.9	2.40926	1.26859	5.15526e-10	3.73592e-07	Chr6	4767812	4768414	-	603	-	-	-	virNOG24250	S	-	serine/arginine repetitive matrix-like protein	-	-	-	-
CsGy2G016460	2838.04	1571.21	4104.88	2.61257	1.38547	6.25998e-10	4.362e-07	Chr2	20788220	20789308	-	1089	-	GO:0003677;GO:0003700;GO:0005634;GO:0006355;	K09286	virNOG05998	K	sp|Q8H1E4|RAP24_ARATH Ethylene-responsive transcription factor RAP2-4 OS=Arabidopsis thaliana GN=RAP2-4 PE=1 SV=1	ethylene-responsive transcription factor RAP2-4-like	GO:0006355//regulation of transcription, DNA-templated;	GO:0005634//nucleus;	GO:0003677//DNA binding;GO:0003700//DNA-binding transcription factor activity;	-
CsGy2G024840	132.649	51.3982	213.899	4.1616	2.05714	6.5633e-10	4.40397e-07	Chr2	32490379	32494977	+	1756	-	GO:0008483;GO:0009058;GO:0030170;	K10206	virNOG15221	E	sp|Q10MQ2|DAPAT_ORYSJ Probable LL-diaminopimelate aminotransferase, chloroplastic OS=Oryza sativa subsp. japonica GN=AGD2 PE=2 SV=1	LL-diaminopimelate aminotransferase	GO:0009058//biosynthetic process;	-	GO:0008483//transaminase activity;GO:0030170//pyridoxal phosphate binding;	ko00300(Lysine biosynthesis)
CsGy6G003130	4624.26	2610.33	6638.18	2.54304	1.34655	7.95689e-10	5.14839e-07	Chr6	2567756	2570384	+	1584	-	GO:0003677;GO:0005634;GO:0006355;	-	virNOG15300	K	sp|Q9FPE8|HHO3_ARATH Transcription factor HHO3 OS=Arabidopsis thaliana GN=HHO3 PE=2 SV=1	probable transcription factor GLK2	GO:0006355//regulation of transcription, DNA-templated;	GO:0005634//nucleus;	GO:0003677//DNA binding;	-
CsGy5G018440	836.161	288.004	1384.32	4.8066	2.26502	8.94648e-10	5.58908e-07	Chr5	24891049	24895352	+	1574	-	GO:0003993;GO:0016021;GO:0016311;	K14379	virNOG01778	O	sp|Q8VYZ2|PPA8_ARATH Purple acid phosphatase 8 OS=Arabidopsis thaliana GN=PAP8 PE=2 SV=1	Purple acid phosphatase	GO:0016311//dephosphorylation;	GO:0016021//integral component of membrane;	GO:0003993//acid phosphatase activity;	ko05323(Rheumatoid arthritis);ko04380(Osteoclast differentiation);ko04142(Lysosome);ko00740(Riboflavin metabolism)
CsGy4G021630	2234.02	223.884	4244.16	18.9569	4.24465	1.62175e-09	9.47781e-07	Chr4	28246472	28247053	+	582	-	GO:0003677;GO:0003700;GO:0005634;GO:0006355;	-	virNOG34014;virNOG23697	K	sp|O80340|ERF78_ARATH Ethylene-responsive transcription factor 4 OS=Arabidopsis thaliana GN=ERF4 PE=1 SV=1	ethylene-responsive transcription factor 4	GO:0006355//regulation of transcription, DNA-templated;	GO:0005634//nucleus;	GO:0003677//DNA binding;GO:0003700//DNA-binding transcription factor activity;	-
CsGy1G014850	4414.47	1087.6	7741.34	7.11783	2.83144	2.2984e-09	1.26182e-06	Chr1	10757215	10758048	-	834	-	GO:0000932;GO:0003676;GO:0004535;GO:0016740;GO:0017148;GO:0030015;GO:0043928;GO:0090503;	K12581	virNOG39061	K	sp|Q9FMS6|CAF1K_ARATH Probable CCR4-associated factor 1 homolog 11 OS=Arabidopsis thaliana GN=CAF1-11 PE=2 SV=1	probable CCR4-associated factor 1 homolog 11	GO:0017148//negative regulation of translation;GO:0043928//exonucleolytic catabolism of deadenylated mRNA;GO:0090503//RNA phosphodiester bond hydrolysis, exonucleolytic;	GO:0000932//P-body;GO:0030015//CCR4-NOT core complex;	GO:0003676//nucleic acid binding;GO:0004535//poly(A)-specific ribonuclease activity;GO:0016740//transferase activity;	ko03018(RNA degradation)
CsGy5G004910	3571.38	1683.67	5459.08	3.24236	1.69704	2.75874e-09	1.47e-06	Chr5	3170650	3171357	-	708	-	GO:0003677;GO:0003700;GO:0005634;GO:0006355;	K09286	virNOG21432;virNOG21346	K	sp|Q40478|ERF5_TOBAC Ethylene-responsive transcription factor 5 OS=Nicotiana tabacum GN=ERF5 PE=2 SV=1	ethylene-responsive transcription factor ERF105	GO:0006355//regulation of transcription, DNA-templated;	GO:0005634//nucleus;	GO:0003677//DNA binding;GO:0003700//DNA-binding transcription factor activity;	-
CsGy5G007310	4204.11	2445.78	5962.45	2.43785	1.28561	1.17454e-08	5.75111e-06	Chr5	5030440	5036915	-	2100	-	-	-	virNOG06232	S	sp|Q9FN03|UVR8_ARATH Ultraviolet-B receptor UVR8 OS=Arabidopsis thaliana GN=UVR8 PE=1 SV=1	ultraviolet-B receptor UVR8 isoform X2	-	-	-	-
CsGy2G011430	1207.02	669.83	1744.2	2.60395	1.3807	1.31723e-08	6.28008e-06	Chr2	11285133	11287984	-	2149	-	GO:0003700;GO:0005634;GO:0006355;GO:0043565;	K09419	virNOG05764	K	sp|Q8H7Y6|HFA2D_ORYSJ Heat stress transcription factor A-2d OS=Oryza sativa subsp. japonica GN=HSFA2D PE=2 SV=2	heat stress transcription factor A-2e-like	GO:0006355//regulation of transcription, DNA-templated;	GO:0005634//nucleus;	GO:0003700//DNA-binding transcription factor activity;GO:0043565//sequence-specific DNA binding;	-
CsGy3G005570	256.056	53.8084	458.304	8.51733	3.0904	3.37654e-08	1.42262e-05	Chr3	4510335	4510706	-	372	-	GO:0005509;	-	virNOG21263	ZD	sp|Q9LSQ6|PBP1_ARATH Calcium-binding protein PBP1 OS=Arabidopsis thaliana GN=PBP1 PE=1 SV=1	calcium-binding protein PBP1-like	-	-	GO:0005509//calcium ion binding;	-
CsGy1G003670	195.498	97.3501	293.645	3.01638	1.59282	6.31213e-08	2.41518e-05	Chr1	2314879	2315493	-	615	-	-	-	virNOG23826;virNOG24457;virNOG24225	SA	-	hypothetical protein	-	-	-	-
CsGy2G018680	647.714	280.958	1014.47	3.61075	1.8523	6.39889e-08	2.41518e-05	Chr2	28272340	28273212	-	873	-	GO:0000981;GO:0001135;GO:0005634;GO:0006357;GO:0030154;GO:0043565;GO:0044212;	K09422	COG5147;virNOG09221	K	sp|Q9FDW1|MYB44_ARATH Transcription factor MYB44 OS=Arabidopsis thaliana GN=MYB44 PE=1 SV=1	MYB transcription factor	GO:0006357//regulation of transcription by RNA polymerase II;GO:0030154//cell differentiation;	GO:0005634//nucleus;	GO:0000981//DNA-binding transcription factor activity, RNA polymerase II-specific;GO:0001135//obsolete RNA polymerase II transcription regulator recruiting activity;GO:0043565//sequence-specific DNA binding;	-
CsGy6G004680	720.079	216.074	1224.08	5.66512	2.50211	7.22828e-08	2.67255e-05	Chr6	4296502	4297653	-	1152	-	GO:0004674;GO:0005524;GO:0006468;GO:0016021;	-	virNOG12129	T	sp|Q9FN37|PSKR2_ARATH Phytosulfokine receptor 2 OS=Arabidopsis thaliana GN=PSKR2 PE=2 SV=1	Receptor serine-threonine protein kinase	GO:0006468//protein phosphorylation;	GO:0016021//integral component of membrane;	GO:0004674//protein serine/threonine kinase activity;GO:0005524//ATP binding;	-
CsGy1G028150	638.715	34.5681	1242.86	35.954	5.16808	9.66879e-08	3.50339e-05	Chr1	26358684	26359295	-	612	-	GO:0003677;GO:0003700;GO:0005634;GO:0006355;	-	virNOG19548	K	sp|Q84QC2|ERF17_ARATH Ethylene-responsive transcription factor ERF017 OS=Arabidopsis thaliana GN=ERF017 PE=2 SV=1	ethylene-responsive transcription factor ERF017-like	GO:0006355//regulation of transcription, DNA-templated;	GO:0005634//nucleus;	GO:0003677//DNA binding;GO:0003700//DNA-binding transcription factor activity;	-
CsGy3G005950	2350.64	1487.69	3213.59	2.16012	1.11111	1.75883e-07	5.87491e-05	Chr3	4973129	4979122	-	2773	-	GO:0005216;GO:0016021;GO:0034220;	-	virNOG01681;virNOG13727	P	sp|Q94AS9|CNGC4_ARATH Cyclic nucleotide-gated ion channel 4 OS=Arabidopsis thaliana GN=CNGC4 PE=2 SV=2	cyclic nucleotide-gated ion channel 4	GO:0034220//ion transmembrane transport;	GO:0016021//integral component of membrane;	GO:0005216//ion channel activity;	-
CsGy6G007400	203.293	109.407	297.179	2.71627	1.44163	1.79679e-07	5.87491e-05	Chr6	6264808	6267722	+	1590	-	GO:0004672;GO:0005096;GO:0005524;GO:0005737;GO:0006468;GO:0016021;GO:0043547;GO:0046872;	K04730	virNOG09820	T	sp|Q9LYU7|CRN_ARATH Inactive leucine-rich repeat receptor-like protein kinase CORYNE OS=Arabidopsis thaliana GN=CRN PE=1 SV=1	Receptor-like protein kinase	GO:0006468//protein phosphorylation;GO:0043547//positive regulation of GTPase activity;	GO:0005737//cytoplasm;GO:0016021//integral component of membrane;	GO:0004672//protein kinase activity;GO:0005096//GTPase activator activity;GO:0005524//ATP binding;GO:0046872//metal ion binding;	ko05417(Lipid and atherosclerosis);ko05171(Coronavirus disease - COVID-19);ko05170(Human immunodeficiency virus 1 infection);ko05169(Epstein-Barr virus infection);ko05168(Herpes simplex virus 1 infection);ko05162(Measles);ko05161(Hepatitis B);ko05152(Tuberculosis);ko05145(Toxoplasmosis);ko05142(Chagas disease);ko05140(Leishmaniasis);ko05135(Yersinia infection);ko05133(Pertussis);ko05132(Salmonell…
CsGy4G006860	338.186	125.829	550.543	4.37533	2.12939	2.08907e-07	6.30794e-05	Chr4	4963290	4965467	-	1449	-	GO:0004497;GO:0005506;GO:0016021;GO:0016705;GO:0020037;GO:0055114;	K09843	virNOG01723	Q	sp|Q949P1|ABAH1_ARATH Abscisic acid 8&apos;-hydroxylase 1 OS=Arabidopsis thaliana GN=CYP707A1 PE=2 SV=1	Cytochrome P450 family protein	GO:0055114//obsolete oxidation-reduction process;	GO:0016021//integral component of membrane;	GO:0004497//monooxygenase activity;GO:0005506//iron ion binding;GO:0016705//oxidoreductase activity, acting on paired donors, with incorporation or reduction of molecular oxygen;GO:0020037//heme binding;	ko00906(Carotenoid biosynthesis)
CsGy2G002020	1427.62	839.865	2015.38	2.39965	1.26283	2.25957e-07	6.60268e-05	Chr2	1370199	1370882	-	684	-	GO:0005509;GO:0016021;	-	virNOG20053	T	sp|Q9SU00|CML2_ARATH Calmodulin-like protein 2 OS=Arabidopsis thaliana GN=CML2 PE=2 SV=1	calmodulin-like protein 7	-	GO:0016021//integral component of membrane;	GO:0005509//calcium ion binding;	-
CsGy3G014150	561.832	350.676	772.989	2.20429	1.14031	2.63527e-07	7.45986e-05	Chr3	10504937	10509607	-	973	-	GO:0006629;GO:0016021;GO:0016787;	-	virNOG01261	I	sp|P19515|LIP_RHIMI Lipase OS=Rhizomucor miehei PE=1 SV=2	alpha/beta-Hydrolases superfamily protein	GO:0006629//lipid metabolic process;	GO:0016021//integral component of membrane;	GO:0016787//hydrolase activity;	-
CsGy2G016470	278.922	159.398	398.446	2.49969	1.32175	2.91777e-07	8.13251e-05	Chr2	20789319	20790365	-	255	-	-	-	-	-	-	Unknown Protein	-	-	-	-
CsGy1G014270	572.706	354.973	790.438	2.22676	1.15494	3.29401e-07	9.00167e-05	Chr1	10010882	10012198	-	1317	-	GO:0004664;GO:0009094;GO:0009570;GO:0047769;	K05359	virNOG03269	E	sp|Q9SGD6|AROD6_ARATH Arogenate dehydratase/prephenate dehydratase 6, chloroplastic OS=Arabidopsis thaliana GN=ADT6 PE=1 SV=1	Arogenate dehydratase	GO:0009094//L-phenylalanine biosynthetic process;	GO:0009570//chloroplast stroma;	GO:0004664//prephenate dehydratase activity;GO:0047769//arogenate dehydratase activity;	ko00400(Phenylalanine, tyrosine and tryptophan biosynthesis)
CsGy5G005700	3357.21	1239.74	5474.68	4.41598	2.14274	3.37464e-07	9.00167e-05	Chr5	3745108	3748381	-	2440	-	GO:0016021;GO:0022857;GO:0055085;	K13783	virNOG00131	G	sp|Q9C5L3|GLPT1_ARATH Putative glycerol-3-phosphate transporter 1 OS=Arabidopsis thaliana GN=At3g47420 PE=2 SV=1	Glycerol-3-phosphate transporter	GO:0055085//transmembrane transport;	GO:0016021//integral component of membrane;	GO:0022857//transmembrane transporter activity;	-
CsGy5G024520	332.228	199.953	464.503	2.32306	1.21602	5.22448e-07	0.000125422	Chr5	29140948	29142408	+	1461	-	GO:0004190;GO:0006508;	-	virNOG04978	O	sp|Q9LS40|ASPG1_ARATH Protein ASPARTIC PROTEASE IN GUARD CELL 1 OS=Arabidopsis thaliana GN=ASPG1 PE=1 SV=1	protein ASPARTIC PROTEASE IN GUARD CELL 1	GO:0006508//proteolysis;	-	GO:0004190//aspartic-type endopeptidase activity;	-
CsGy2G021440	3322.07	1635.15	5008.99	3.06332	1.6151	5.2511e-07	0.000125422	Chr2	30104019	30107238	+	2651	-	GO:0004190;GO:0006508;GO:0043067;	-	virNOG13728	O	sp|O04496|AED3_ARATH Aspartyl protease AED3 OS=Arabidopsis thaliana GN=AED3 PE=1 SV=1	aspartyl protease AED3	GO:0006508//proteolysis;GO:0043067//regulation of programmed cell death;	-	GO:0004190//aspartic-type endopeptidase activity;	-
CsGy1G021600	135.07	40.9045	229.235	5.60415	2.48649	6.7232e-07	0.000156159	Chr1	20302952	20303707	+	756	-	-	-	virNOG19255	S	-	DUF1685 domain-containing protein	-	-	-	-
CsGy4G020710	150.147	66.1993	234.094	3.5362	1.8222	7.30918e-07	0.000167621	Chr4	27496690	27498063	+	789	-	GO:0005199;	-	virNOG20784;virNOG23550	R	sp|Q00451|PRF1_SOLLC 36.4 kDa proline-rich protein OS=Solanum lycopersicum GN=TPRP-F1 PE=2 SV=1	Bifunctional inhibitor/lipid-transfer protein/seed storage 2S albumin superfamily protein	-	-	GO:0005199//structural constituent of cell wall;	-
CsGy3G017770	459.548	286.306	632.79	2.21019	1.14417	7.62854e-07	0.000172758	Chr3	13727448	13728740	-	1293	-	GO:0004190;GO:0006508;	-	virNOG07141;KOG1339	O	sp|Q9LZL3|PCS1L_ARATH Aspartic proteinase PCS1 OS=Arabidopsis thaliana GN=PCS1 PE=2 SV=1	aspartic proteinase PCS1	GO:0006508//proteolysis;	-	GO:0004190//aspartic-type endopeptidase activity;	-
CsGy7G007210	106.347	38.6426	174.051	4.50411	2.17124	9.00434e-07	0.000196544	Chr7	5197061	5199998	+	1823	-	GO:0005506;GO:0007275;GO:0010268;GO:0010295;GO:0016021;GO:0016125;GO:0016132;GO:0020037;GO:0055114;	K09843	virNOG08095	Q	sp|Q9LJK2|ABAH4_ARATH Abscisic acid 8&apos;-hydroxylase 4 OS=Arabidopsis thaliana GN=CYP707A4 PE=2 SV=2	Cytochrome P450 family protein	GO:0007275//multicellular organism development;GO:0010268//brassinosteroid homeostasis;GO:0016125//sterol metabolic process;GO:0016132//brassinosteroid biosynthetic process;GO:0055114//obsolete oxidation-reduction process;	GO:0016021//integral component of membrane;	GO:0005506//iron ion binding;GO:0010295//(+)-abscisic acid 8'-hydroxylase activity;GO:0020037//heme binding;	ko00906(Carotenoid biosynthesis)
CsGy6G027900	658.237	426.354	890.12	2.08775	1.06195	1.22236e-06	0.000254546	Chr6	26928843	26929748	+	906	-	GO:0003677;	K09422	virNOG09221	K	sp|Q9FDW1|MYB44_ARATH Transcription factor MYB44 OS=Arabidopsis thaliana GN=MYB44 PE=1 SV=1	transcription factor MYB44	-	-	GO:0003677//DNA binding;	-
CsGy3G039490	810.882	536.156	1085.61	2.0248	1.01778	1.42427e-06	0.000289926	Chr3	37168773	37171184	+	2093	-	GO:0008168;GO:0016021;GO:0032259;	-	virNOG15685	R	sp|Q6N3Y0|ARSM_RHOPA Arsenite methyltransferase OS=Rhodopseudomonas palustris (strain ATCC BAA-98 / CGA009) GN=arsM PE=1 SV=1	Demethylmenaquinone methyltransferase	GO:0032259//methylation;	GO:0016021//integral component of membrane;	GO:0008168//methyltransferase activity;	-
CsGy5G022570	1505.88	435.787	2575.97	5.91109	2.56342	1.48446e-06	0.000298822	Chr5	27952467	27953609	-	1143	-	GO:0016757;	-	virNOG04571;virNOG10963	G	sp|O48684|GATL8_ARATH Probable galacturonosyltransferase-like 8 OS=Arabidopsis thaliana GN=GATL8 PE=2 SV=1	Hexosyltransferase	-	-	GO:0016757//glycosyltransferase activity;	-
CsGy3G000380	2688.14	1766.86	3609.42	2.04284	1.03058	1.72517e-06	0.000339727	Chr3	312343	314592	-	1314	-	-	-	virNOG14034	KB	sp|Q7JUR6|GDAP2_DROME Protein GDAP2 homolog OS=Drosophila melanogaster GN=CG18812 PE=2 SV=1	ganglioside-induced differentiation-associated protein 2	-	-	-	-
CsGy3G024750	42.3332	12.9009	71.7656	5.56284	2.47582	1.75271e-06	0.000341439	Chr3	25011613	25014551	+	1877	-	GO:0004722;GO:0006470;GO:0046872;	K14497	virNOG10628	T	sp|Q65XK7|P2C51_ORYSJ Probable protein phosphatase 2C 51 OS=Oryza sativa subsp. japonica GN=Os05g0572700 PE=2 SV=1	probable protein phosphatase 2C 8	GO:0006470//protein dephosphorylation;	-	GO:0004722//protein serine/threonine phosphatase activity;GO:0046872//metal ion binding;	ko04931(Insulin resistance);ko04075(Plant hormone signal transduction);ko04016(MAPK signaling pathway - plant)
CsGy6G028070	1070.46	603.503	1537.42	2.54749	1.34908	1.83333e-06	0.000346994	Chr6	27051386	27054414	-	2482	-	-	-	-	-	-	arabinogalactan protein 18	-	-	-	-
CsGy7G004440	2890.27	359.634	5420.91	15.0734	3.91393	1.87973e-06	0.000351084	Chr7	3329800	3330429	+	630	-	GO:0003677;GO:0003700;GO:0005634;GO:0006355;	-	virNOG15868;virNOG22551;virNOG23872	K	sp|O80340|ERF78_ARATH Ethylene-responsive transcription factor 4 OS=Arabidopsis thaliana GN=ERF4 PE=1 SV=1	Ethylene-responsive transcription factor	GO:0006355//regulation of transcription, DNA-templated;	GO:0005634//nucleus;	GO:0003677//DNA binding;GO:0003700//DNA-binding transcription factor activity;	-
CsGy2G021470	767.793	108.254	1427.33	13.1851	3.72083	3.35523e-06	0.000568101	Chr2	30108792	30109751	+	960	-	GO:0005743;GO:0006839;GO:0015116;GO:0015117;GO:0015131;GO:0015140;GO:0015141;GO:0015297;GO:0015709;GO:0016021;GO:0035435;GO:0071422;GO:0071423;GO:1902356;GO:1902358;	K15104	virNOG09017	C	sp|Q9SJY5|PUMP5_ARATH Mitochondrial uncoupling protein 5 OS=Arabidopsis thaliana GN=PUMP5 PE=2 SV=1	Mitochondrial substrate carrier family protein	GO:0006839//mitochondrial transport;GO:0015709//thiosulfate transport;GO:0035435//phosphate ion transmembrane transport;GO:0071422//succinate transmembrane transport;GO:0071423//malate transmembrane transport;GO:1902356//oxaloacetate(2-) transmembrane transport;GO:1902358//sulfate transmembrane transport;	GO:0005743//mitochondrial inner membrane;GO:0016021//integral component of membrane;	GO:0015116//sulfate transmembrane transporter activity;GO:0015117//thiosulfate transmembrane transporter activity;GO:0015131//oxaloacetate transmembrane transporter activity;GO:0015140//malate transmembrane transporter activity;GO:0015141//succinate transmembrane transporter activity;GO:0015297//antiporter activity;	-
CsGy6G010480	623.883	408.607	839.158	2.05371	1.03823	4.96238e-06	0.000795606	Chr6	8999677	9001083	-	1245	-	-	-	virNOG08711	S	-	sugar phosphate exchanger%2C putative (DUF506)	-	-	-	-
CsGy5G001410	27439.4	15772.3	39106.6	2.47945	1.31002	9.35678e-06	0.00138948	Chr5	852247	861105	+	2785	-	GO:0004373;GO:0009501;GO:0009569;GO:0019252;	K13679	virNOG00368	M	sp|O82627|SSG1_ANTMA Granule-bound starch synthase 1, chloroplastic/amyloplastic OS=Antirrhinum majus GN=WAXY PE=2 SV=1	Starch synthase, chloroplastic/amyloplastic	GO:0019252//starch biosynthetic process;	GO:0009501//amyloplast;GO:0009569//chloroplast starch grain;	GO:0004373//glycogen (starch) synthase activity;	ko00500(Starch and sucrose metabolism)
CsGy1G017460	541.723	261.093	822.353	3.14965	1.65519	1.11367e-05	0.00160129	Chr1	15669285	15671311	-	1833	-	-	-	virNOG19651	O	-	probable E3 ubiquitin-protein ligase RHY1A	-	-	-	-
CsGy5G008190	325.029	212.12	437.938	2.06457	1.04584	1.19177e-05	0.00168682	Chr5	6058098	6059423	+	1326	-	GO:0016747;	-	virNOG15790	S	sp|Q9FFQ7|FACT_ARATH Fatty alcohol:caffeoyl-CoA acyltransferase OS=Arabidopsis thaliana GN=FACT PE=2 SV=1	taxadien-5-alpha-ol O-acetyltransferase	-	-	GO:0016747//acyltransferase activity, transferring groups other than amino-acyl groups;	-
CsGy5G008070	9987.09	4405.98	15568.2	3.53343	1.82107	1.29673e-05	0.00180714	Chr5	5917129	5920738	+	2848	-	GO:0046872;	-	virNOG01784	R	sp|Q9XEE6|C3H29_ARATH Zinc finger CCCH domain-containing protein 29 OS=Arabidopsis thaliana GN=At2g40140 PE=1 SV=1	Zinc finger CCCH domain-containing protein 29-like protein	-	-	GO:0046872//metal ion binding;	-
CsGy4G024030	2456.18	1467.26	3445.1	2.34798	1.23142	1.39431e-05	0.00192319	Chr4	29878110	29882286	+	2102	-	GO:0009690;GO:0016614;GO:0019139;GO:0050660;GO:0055114;	K00279	virNOG06762	C	sp|Q9FUJ1|CKX7_ARATH Cytokinin dehydrogenase 7 OS=Arabidopsis thaliana GN=CKX7 PE=1 SV=1	cytokinin dehydrogenase 7	GO:0009690//cytokinin metabolic process;GO:0055114//obsolete oxidation-reduction process;	-	GO:0016614//oxidoreductase activity, acting on CH-OH group of donors;GO:0019139//cytokinin dehydrogenase activity;GO:0050660//flavin adenine dinucleotide binding;	ko00908(Zeatin biosynthesis)
CsGy3G025720	679.681	79.7284	1279.63	16.0499	4.00449	2.29958e-05	0.00301895	Chr3	26437229	26439229	-	1856	-	GO:0007165;	-	virNOG24869;virNOG25594	AR	sp|Q94F39|AFP3_ARATH Ninja-family protein AFP3 OS=Arabidopsis thaliana GN=AFP3 PE=1 SV=1	ninja-family protein 5-like	GO:0007165//signal transduction;	-	-	-
CsGy5G013930	2462.47	1332.92	3592.03	2.69486	1.43021	2.74898e-05	0.00350842	Chr5	18957181	18958134	+	954	-	GO:0003677;GO:0003700;GO:0005634;GO:0006355;	K09287	virNOG07414	K	sp|Q9ZWM9|RAV1_ARATH AP2/ERF and B3 domain-containing transcription factor RAV1 OS=Arabidopsis thaliana GN=RAV1 PE=1 SV=1	AP2/ERF and B3 domain-containing transcription factor RAV1-like	GO:0006355//regulation of transcription, DNA-templated;	GO:0005634//nucleus;	GO:0003677//DNA binding;GO:0003700//DNA-binding transcription factor activity;	-
CsGy7G002710	1574.99	953.368	2196.61	2.30405	1.20417	2.75101e-05	0.00350842	Chr7	2173255	2174765	-	579	-	-	-	-	-	-	Uncharacterized protein	-	-	-	-
CsGy3G020690	1283.76	145.599	2421.92	16.6342	4.05608	3.54134e-05	0.00430594	Chr3	17884291	17885619	-	1329	-	GO:0004842;GO:0016567;	-	virNOG08973	R	sp|Q5PNY6|PUB21_ARATH U-box domain-containing protein 21 OS=Arabidopsis thaliana GN=PUB21 PE=2 SV=1	RING-type E3 ubiquitin transferase	GO:0016567//protein ubiquitination;	-	GO:0004842//ubiquitin-protein transferase activity;	-
CsGy4G017280	1530.55	818.753	2242.35	2.73874	1.45351	4.32991e-05	0.00502852	Chr4	22296438	22300168	-	3523	-	GO:0006809;GO:0009703;GO:0020037;GO:0030151;GO:0042128;GO:0043546;GO:0050464;GO:0055114;	K10534	virNOG00316	C	sp|P17569|NIA_CUCMA Nitrate reductase [NADH] OS=Cucurbita maxima PE=2 SV=1	Nitrate reductase	GO:0006809//nitric oxide biosynthetic process;GO:0042128//nitrate assimilation;GO:0055114//obsolete oxidation-reduction process;	-	GO:0009703//nitrate reductase (NADH) activity;GO:0020037//heme binding;GO:0030151//molybdenum ion binding;GO:0043546//molybdopterin cofactor binding;GO:0050464//nitrate reductase (NADPH) activity;	ko00910(Nitrogen metabolism)
CsGy4G012330	29.1334	3.66755	54.5993	14.8871	3.89599	5.9901e-05	0.00648522	Chr4	15604081	15604434	-	247	-	-	-	-	-	-	Unknown Protein	-	-	-	-
CsGy3G027880	463.39	121.37	805.41	6.63598	2.73031	6.01378e-05	0.00648522	Chr3	28915026	28915473	-	432	-	GO:0016021;	-	virNOG24924;NOG178006	S	-	transmembrane protein	-	GO:0016021//integral component of membrane;	-	-
CsGy3G022710	41.3699	14.2411	68.4988	4.80993	2.26602	6.09859e-05	0.00653776	Chr3	21373187	21375463	-	1693	-	-	-	virNOG09185	S	-	IQ-domain 26	-	-	-	-
CsGy6G036600	540.239	270.55	809.928	2.99363	1.5819	6.17969e-05	0.00658573	Chr6	32020049	32022332	+	1729	-	GO:0016042;GO:0016787;	-	virNOG15010	I	sp|Q9SV43|PLP7_ARATH Patatin-like protein 7 OS=Arabidopsis thaliana GN=PLP7 PE=2 SV=1	Patatin	GO:0016042//lipid catabolic process;	-	GO:0016787//hydrolase activity;	-
CsGy7G000800	2758.48	1578.13	3938.83	2.49588	1.31955	6.30787e-05	0.00668302	Chr7	861630	863289	-	1063	-	GO:0005737;GO:0009506;GO:0030001;GO:0046914;GO:0046916;	-	virNOG03731;KOG1603	P	sp|Q9SZN7|HIP26_ARATH Heavy metal-associated isoprenylated plant protein 26 OS=Arabidopsis thaliana GN=HIPP26 PE=1 SV=1	heavy metal-associated isoprenylated plant protein 26-like	GO:0030001//metal ion transport;GO:0046916//cellular transition metal ion homeostasis;	GO:0005737//cytoplasm;GO:0009506//plasmodesma;	GO:0046914//transition metal ion binding;	-
CsGy1G021680	159.88	98.1372	221.624	2.2583	1.17524	6.67132e-05	0.00698637	Chr1	20383594	20386975	-	1959	-	GO:0016021;GO:0022857;GO:0055085;	K14611	virNOG12751	P	sp|Q94C70|NAT2_ARATH Nucleobase-ascorbate transporter 2 OS=Arabidopsis thaliana GN=NAT2 PE=2 SV=2	nucleobase-ascorbate transporter 2	GO:0055085//transmembrane transport;	GO:0016021//integral component of membrane;	GO:0022857//transmembrane transporter activity;	ko04977(Vitamin digestion and absorption)
CsGy2G010620	368.771	238.191	499.351	2.09643	1.06794	6.97094e-05	0.00725819	Chr2	10444977	10451447	+	2665	-	-	-	virNOG14400	S	sp|Q84WL6|WDL3_ARATH Protein WVD2-like 3 OS=Arabidopsis thaliana GN=WDL3 PE=1 SV=1	protein WVD2-like 3	-	-	-	-
CsGy6G001650	4828.99	1655.38	8002.59	4.83428	2.2733	7.52549e-05	0.00768116	Chr6	1143986	1145431	-	1446	-	GO:0006952;GO:0019441;GO:0020037;GO:0046872;	-	virNOG09105	S	sp|O04203|HSPR2_ARATH Nematode resistance protein-like HSPRO2 OS=Arabidopsis thaliana GN=HSPRO2 PE=1 SV=1	nematode resistance protein-like HSPRO2	GO:0006952//defense response;GO:0019441//tryptophan catabolic process to kynurenine;	-	GO:0020037//heme binding;GO:0046872//metal ion binding;	-
CsGy6G034340	3304.3	1144.82	5463.79	4.77262	2.25478	7.68496e-05	0.00773492	Chr6	30645026	30645766	-	741	-	GO:0003677;GO:0003700;GO:0005634;GO:0006355;	-	virNOG22551	K	sp|Q40477|ERF4_TOBAC Ethylene-responsive transcription factor 4 OS=Nicotiana tabacum GN=ERF4 PE=1 SV=1	ethylene-responsive transcription factor 4-like	GO:0006355//regulation of transcription, DNA-templated;	GO:0005634//nucleus;	GO:0003677//DNA binding;GO:0003700//DNA-binding transcription factor activity;	-
CsGy6G029860	7233.85	4577.25	9890.45	2.16079	1.11156	8.31669e-05	0.00827876	Chr6	28309349	28312351	-	1236	-	GO:0003677;GO:0003700;GO:0005634;GO:0006355;	K09286	virNOG05998	K	sp|O65665|ERF60_ARATH Ethylene-responsive transcription factor ERF060 OS=Arabidopsis thaliana GN=ERF060 PE=2 SV=1	ethylene-responsive transcription factor ERF060	GO:0006355//regulation of transcription, DNA-templated;	GO:0005634//nucleus;	GO:0003677//DNA binding;GO:0003700//DNA-binding transcription factor activity;	-
CsGy7G010170	37.6684	9.31196	66.0248	7.09032	2.82585	0.000115367	0.0108295	Chr7	12839725	12840108	+	384	-	GO:0009733;	K14488	virNOG22742	S	sp|Q9LTV3|SAU72_ARATH Auxin-responsive protein SAUR72 OS=Arabidopsis thaliana GN=SAUR72 PE=2 SV=1	auxin-responsive protein SAUR71-like	GO:0009733//response to auxin;	-	-	ko04075(Plant hormone signal transduction)
CsGy4G022990	3852.53	1301.77	6403.29	4.91889	2.29833	0.000116733	0.0109013	Chr4	29223421	29224209	-	789	-	GO:0003676;	-	virNOG19434	R	sp|O22533|ZAT6_ARATH Zinc finger protein ZAT6 OS=Arabidopsis thaliana GN=ZAT6 PE=2 SV=1	Zinc-finger protein 1	-	-	GO:0003676//nucleic acid binding;	-
CsGy1G000630	125.243	23.7268	226.76	9.55712	3.25658	0.000148383	0.0134413	Chr1	348292	348720	-	429	-	GO:0005509;	K13448	KOG0027;virNOG35256;virNOG21480	T	sp|Q8RYJ8|CML19_ORYSJ Putative calcium-binding protein CML19 OS=Oryza sativa subsp. japonica GN=CML19 PE=3 SV=1	putative calcium-binding protein CML19	-	-	GO:0005509//calcium ion binding;	ko04626(Plant-pathogen interaction)
CsGy1G006110	551.599	304.741	798.457	2.62012	1.38963	0.000156975	0.0141489	Chr1	3967261	3971271	+	2937	-	GO:0006004;GO:0016021;GO:0016757;	-	virNOG01198	S	sp|Q4V398|OFT34_ARATH O-fucosyltransferase 34 OS=Arabidopsis thaliana GN=OFUT34 PE=2 SV=1	O-fucosyltransferase family protein	GO:0006004//fucose metabolic process;	GO:0016021//integral component of membrane;	GO:0016757//glycosyltransferase activity;	-
CsGy3G023050	592.956	163.231	1022.68	6.26523	2.64737	0.000175121	0.0155523	Chr3	22392895	22393879	-	927	-	-	-	virNOG19484;virNOG21819	S	-	hypothetical protein (DUF1645)	-	-	-	-
CsGy4G015710	281.517	181.805	381.229	2.09691	1.06826	0.000193349	0.0166805	Chr4	20424154	20424973	+	297	-	GO:0046983;	-	virNOG21389	S	-	transcription factor SCREAM-like protein	-	-	GO:0046983//protein dimerization activity;	-
CsGy7G004460	46.4871	20.9772	71.997	3.43215	1.77911	0.000205329	0.0176301	Chr7	3348955	3349983	-	1029	-	GO:0046872;	-	virNOG17045	K	sp|Q9ZWA1|C3H2_ARATH Zinc finger CCCH domain-containing protein 2 OS=Arabidopsis thaliana GN=At1g03790 PE=2 SV=1	zinc finger CCCH domain-containing protein 2-like	-	-	GO:0046872//metal ion binding;	-
CsGy5G001400	556.663	96.6425	1016.68	10.5201	3.39507	0.000226937	0.0190556	Chr5	848417	848739	-	201	-	-	-	-	-	-	Uncharacterized protein	-	-	-	-
CsGy3G040460	1412.04	835.096	1988.98	2.38174	1.25202	0.000228764	0.0190556	Chr3	37878652	37881095	+	1278	-	GO:0004553;GO:0005975;	K19355	virNOG07639;COG3934	RG	sp|Q9FJZ3|MAN7_ARATH Mannan endo-1,4-beta-mannosidase 7 OS=Arabidopsis thaliana GN=MAN7 PE=2 SV=1	mannan endo-1,4-beta-mannosidase 7-like	GO:0005975//carbohydrate metabolic process;	-	GO:0004553//hydrolase activity, hydrolyzing O-glycosyl compounds;	ko00051(Fructose and mannose metabolism)
CsGy6G003040	31.3345	11.1457	51.5232	4.62269	2.20873	0.000229389	0.0190556	Chr6	2395599	2398778	+	2300	-	-	-	virNOG13197;virNOG17751	FR	-	ATP-dependent helicase/nuclease subunit A	-	-	-	-
CsGy5G002100	281.253	150.005	412.501	2.74991	1.45938	0.000249307	0.0200197	Chr5	1308194	1309150	-	957	-	GO:0003677;GO:0003700;GO:0005634;GO:0006355;	-	virNOG10717;virNOG20350	K	sp|Q9SUE3|CRF4_ARATH Ethylene-responsive transcription factor CRF4 OS=Arabidopsis thaliana GN=CRF4 PE=1 SV=2	ethylene-responsive transcription factor CRF2-like	GO:0006355//regulation of transcription, DNA-templated;	GO:0005634//nucleus;	GO:0003677//DNA binding;GO:0003700//DNA-binding transcription factor activity;	-
CsGy3G014770	490.489	224.605	756.372	3.36756	1.75171	0.000252454	0.0201485	Chr3	10866094	10866975	+	882	-	GO:0016021;	-	virNOG18724	O	sp|Q8L9T5|ATL2_ARATH RING-H2 finger protein ATL2 OS=Arabidopsis thaliana GN=ATL2 PE=2 SV=2	RING-H2 finger protein ATL2	-	GO:0016021//integral component of membrane;	-	-
CsGy1G011990	1922.9	880.18	2965.62	3.36933	1.75246	0.000259443	0.0204362	Chr1	7561455	7562821	+	1197	-	-	-	virNOG07987	S	sp|Q84WQ5|CBSX5_ARATH CBS domain-containing protein CBSX5 OS=Arabidopsis thaliana GN=CBSX5 PE=2 SV=2	CBS domain-containing protein CBSX5-like	-	-	-	-
CsGy6G010510	114.646	70.435	158.858	2.25538	1.17337	0.000266191	0.020787	Chr6	9024363	9024830	+	468	-	GO:0016021;	-	virNOG20979;virNOG21332	S	-	pyrroline-5-carboxylate reductase	-	GO:0016021//integral component of membrane;	-	-
CsGy4G018310	6.91411	0	13.8282	Inf	Inf	0.000288583	0.0218385	Chr4	23846867	23854172	+	780	-	-	-	-	-	-	Uncharacterized protein	-	-	-	-
CsGy2G020840	904.647	322.441	1486.85	4.61124	2.20515	0.000300228	0.0223836	Chr2	29654768	29655718	+	951	-	-	-	virNOG00701	R	sp|Q9ZPE7|EXO_ARATH Protein EXORDIUM OS=Arabidopsis thaliana GN=EXO PE=2 SV=1	protein EXORDIUM-like	-	-	-	-
CsGy6G029000	633.735	299.645	967.826	3.2299	1.69149	0.000324382	0.0238714	Chr6	27778828	27780959	+	2037	-	GO:0016021;	-	virNOG21746;virNOG19179	S	sp|Q9LSK9|Y5566_ARATH Uncharacterized protein At5g65660 OS=Arabidopsis thaliana GN=At5g65660 PE=2 SV=1	Hydroxyproline-rich glycoprotein family protein	-	GO:0016021//integral component of membrane;	-	-
CsGy6G033230	608.822	307.919	909.724	2.95443	1.56288	0.00033204	0.0242564	Chr6	30048720	30051138	-	1754	-	GO:0005315;GO:0007033;GO:0009536;GO:0009553;GO:0009624;GO:0009793;GO:0010152;GO:0015120;GO:0015152;GO:0015713;GO:0015714;GO:0015760;GO:0016021;GO:0019904;GO:0034389;GO:0035436;GO:0071917;	K15283	virNOG09442	G	sp|Q94B38|GPT2_ARATH Glucose-6-phosphate/phosphate translocator 2, chloroplastic OS=Arabidopsis thaliana GN=GPT2 PE=2 SV=2	glucose-6-phosphate/phosphate translocator 2, chloroplastic	GO:0007033//vacuole organization;GO:0009553//embryo sac development;GO:0009624//response to nematode;GO:0009793//embryo development ending in seed dormancy;GO:0010152//pollen maturation;GO:0015713//phosphoglycerate transmembrane transport;GO:0015714//phosphoenolpyruvate transport;GO:0015760//glucose-6-phosphate transport;GO:0034389//lipid droplet organization;GO:0035436//triose phosphate transmem…	GO:0009536//plastid;GO:0016021//integral component of membrane;	GO:0005315//inorganic phosphate transmembrane transporter activity;GO:0015120//phosphoglycerate transmembrane transporter activity;GO:0015152//glucose-6-phosphate transmembrane transporter activity;GO:0019904//protein domain specific binding;GO:0071917//triose-phosphate transmembrane transporter activity;	-
CsGy5G014760	26.5702	8.98482	44.1555	4.91445	2.29703	0.000450622	0.0310415	Chr5	20507570	20508022	+	387	-	-	-	virNOG20982	S	-	Unknown Protein	-	-	-	-
CsGy1G022870	941.486	515.913	1367.06	2.64978	1.40587	0.000456049	0.0312963	Chr1	21832929	21834803	-	1527	-	GO:0004722;GO:0006470;GO:0046872;	K14497	virNOG06455	T	sp|Q9ZW21|P2C24_ARATH Probable protein phosphatase 2C 24 OS=Arabidopsis thaliana GN=At2g29380 PE=2 SV=1	probable protein phosphatase 2C 24	GO:0006470//protein dephosphorylation;	-	GO:0004722//protein serine/threonine phosphatase activity;GO:0046872//metal ion binding;	ko04931(Insulin resistance);ko04075(Plant hormone signal transduction);ko04016(MAPK signaling pathway - plant)
CsGy2G022460	498.028	302.047	694.01	2.29769	1.20018	0.000499277	0.033807	Chr2	30798447	30808647	+	5339	-	GO:0004045;	-	virNOG20292	S	sp|Q3SZ85|PTRD1_BOVIN Putative peptidyl-tRNA hydrolase PTRHD1 OS=Bos taurus GN=PTRHD1 PE=2 SV=2	putative peptidyl-tRNA hydrolase PTRHD1	-	-	GO:0004045//aminoacyl-tRNA hydrolase activity;	-
CsGy1G010640	141.365	46.5194	236.211	5.07768	2.34417	0.000516537	0.0345318	Chr1	6704713	6705069	+	357	-	-	-	virNOG26591;virNOG25398	S	-	DUF4228 domain-containing protein	-	-	-	-
CsGy4G007460	50.2043	15.7175	84.691	5.38831	2.42983	0.000582928	0.0382642	Chr4	5511631	5513364	-	1734	-	GO:0016702;GO:0046872;GO:0055114;	K09840	virNOG05544	Q	sp|Q9LRR7|NCED3_ARATH 9-cis-epoxycarotenoid dioxygenase NCED3, chloroplastic OS=Arabidopsis thaliana GN=NCED3 PE=2 SV=1	9-cis-epoxycarotenoid dioxygenase, chloroplastic	GO:0055114//obsolete oxidation-reduction process;	-	GO:0016702//oxidoreductase activity, acting on single donors with incorporation of molecular oxygen, incorporation of two atoms of oxygen;GO:0046872//metal ion binding;	ko00906(Carotenoid biosynthesis)
CsGy6G021880	216.429	90.4448	342.414	3.78589	1.92063	0.00062353	0.0396368	Chr6	22476605	22479843	-	1476	-	GO:0004725;GO:0035335;	K18045	virNOG13617	V	sp|Q9ZVN4|Y1500_ARATH Probable tyrosine-protein phosphatase At1g05000 OS=Arabidopsis thaliana GN=At1g05000 PE=1 SV=1	probable tyrosine-protein phosphatase isoform X1	GO:0035335//peptidyl-tyrosine dephosphorylation;	-	GO:0004725//protein tyrosine phosphatase activity;	-
CsGy1G018230	4707.33	2667.18	6747.49	2.52982	1.33904	0.00069085	0.0421418	Chr1	16373133	16374973	+	1727	-	GO:0009506;GO:0016021;	-	virNOG00574	S	sp|Q8S8Q6|TET8_ARATH Tetraspanin-8 OS=Arabidopsis thaliana GN=TET8 PE=2 SV=1	tetraspanin-8-like	-	GO:0009506//plasmodesma;GO:0016021//integral component of membrane;	-	-
CsGy4G000810	109.902	67.9743	151.831	2.23365	1.1594	0.00070517	0.0425852	Chr4	497821	502533	-	1483	-	GO:0016787;	-	virNOG03114;COG0596	RI	sp|I6YGS0|EPHA_MYCTU Epoxide hydrolase A OS=Mycobacterium tuberculosis (strain ATCC 25618 / H37Rv) GN=ephA PE=1 SV=1	bifunctional epoxide hydrolase 2-like	-	-	GO:0016787//hydrolase activity;	-
CsGy6G016920	181.647	89.536	273.758	3.05752	1.61236	0.000717758	0.0430583	Chr6	16385569	16386303	-	735	-	GO:0016021;	-	virNOG18724	O	sp|Q8L9T5|ATL2_ARATH RING-H2 finger protein ATL2 OS=Arabidopsis thaliana GN=ATL2 PE=2 SV=2	RING-H2 finger protein ATL2-like	-	GO:0016021//integral component of membrane;	-	-
CsGy4G003300	210.393	90.6212	330.165	3.64335	1.86527	0.000724571	0.0433236	Chr4	2069991	2070443	-	453	-	GO:0005509;	K13448	virNOG17483	T	sp|Q9SRR7|CML3_ARATH Calmodulin-like protein 3 OS=Arabidopsis thaliana GN=CML3 PE=2 SV=1	Calcium-binding protein	-	-	GO:0005509//calcium ion binding;	ko04626(Plant-pathogen interaction)
CsGy1G015500	43.0803	14.3589	71.8016	5.00048	2.32207	0.00078696	0.0456966	Chr1	11418352	11419216	+	267	-	-	-	virNOG19255	S	-	Unknown Protein	-	-	-	-
CsGy6G026750	99.9265	46.6141	153.239	3.28739	1.71694	0.000886332	0.0489564	Chr6	26219846	26220901	+	1056	-	GO:0000271;GO:0005794;GO:0016757;	-	virNOG05321	G	sp|Q9LN68|GATL1_ARATH Probable galacturonosyltransferase-like 1 OS=Arabidopsis thaliana GN=GATL1 PE=2 SV=1	Hexosyltransferase	GO:0000271//polysaccharide biosynthetic process;	GO:0005794//Golgi apparatus;	GO:0016757//glycosyltransferase activity;	-
CsGy2G020210	252.124	54.3572	449.891	8.27655	3.04903	0.000926412	0.0507064	Chr2	29236154	29240000	-	2153	-	GO:0003993;GO:0016311;GO:0046872;	-	virNOG11339;virNOG14664	G	sp|Q9SDZ9|PPAF2_IPOBA Purple acid phosphatase 2 OS=Ipomoea batatas GN=PAP2 PE=1 SV=1	Purple acid phosphatase	GO:0016311//dephosphorylation;	-	GO:0003993//acid phosphatase activity;GO:0046872//metal ion binding;	-
CsGy5G024660	880.672	512.987	1248.36	2.43351	1.28304	0.00108104	0.0574347	Chr5	29219870	29220741	-	570	-	-	-	virNOG23826	A	-	hypothetical protein	-	-	-	-
CsGy2G001360	561.319	124.567	998.071	8.01234	3.00222	0.00153526	0.0716865	Chr2	906213	906398	+	186	-	-	-	virNOG26867	S	-	ROTUNDIFOLIA like 7	-	-	-	-
CsGy6G024620	621.044	386.823	855.265	2.211	1.1447	0.00156667	0.0724067	Chr6	24431171	24436931	+	2485	-	GO:0016021;GO:0016757;	K13680	virNOG06825	R	sp|Q9LZR3|CSLA9_ARATH Glucomannan 4-beta-mannosyltransferase 9 OS=Arabidopsis thaliana GN=CSLA9 PE=2 SV=1	glucomannan 4-beta-mannosyltransferase 9-like	-	GO:0016021//integral component of membrane;	GO:0016757//glycosyltransferase activity;	-
CsGy6G035970	141.356	86.1014	196.61	2.28347	1.19123	0.00157898	0.0724671	Chr6	31630216	31630864	-	628	-	-	-	-	-	-	Unknown Protein	-	-	-	-
CsGy2G016900	282.387	88.4563	476.318	5.38479	2.42889	0.00158519	0.0724671	Chr2	27176738	27177536	+	606	-	-	-	virNOG14034	KB	sp|Q7JUR6|GDAP2_DROME Protein GDAP2 homolog OS=Drosophila melanogaster GN=CG18812 PE=2 SV=1	ganglioside-induced differentiation-associated protein 2-like	-	-	-	-
CsGy3G005880	69.3949	39.6144	99.1754	2.50352	1.32396	0.00173804	0.0775566	Chr3	4926210	4926566	+	357	-	GO:0005509;	-	virNOG21263	ZD	sp|Q9LSQ6|PBP1_ARATH Calcium-binding protein PBP1 OS=Arabidopsis thaliana GN=PBP1 PE=1 SV=1	calcium-binding protein PBP1	-	-	GO:0005509//calcium ion binding;	-
CsGy7G004260	3355.37	2051.79	4658.94	2.27067	1.18312	0.00180648	0.0797633	Chr7	3181864	3182940	+	870	-	-	-	virNOG08711	S	-	sugar phosphate exchanger%2C putative (DUF506)	-	-	-	-
CsGy2G022930	70.8016	41.5468	100.056	2.40828	1.268	0.0019963	0.084437	Chr2	31092111	31094824	-	1535	-	GO:0004497;GO:0055114;GO:0071949;	-	virNOG10703	C	sp|P86491|6HN3M_PSEFL 6-hydroxynicotinate 3-monooxygenase OS=Pseudomonas fluorescens PE=1 SV=1	2,6-dihydroxypyridine 3-monooxygenase-like	GO:0055114//obsolete oxidation-reduction process;	-	GO:0004497//monooxygenase activity;GO:0071949//FAD binding;	-
CsGy6G034150	1074.87	634.732	1515.01	2.38685	1.25511	0.00200775	0.084437	Chr6	30535094	30542647	-	4101	-	GO:0005783;GO:0005794;GO:0016036;GO:0031625;GO:0044257;GO:0055062;GO:0061630;GO:2000185;	K10581	virNOG07022	O	sp|Q8VY10|UBC24_ARATH Probable ubiquitin-conjugating enzyme E2 24 OS=Arabidopsis thaliana GN=UBC24 PE=1 SV=1	probable ubiquitin-conjugating enzyme E2 24	GO:0016036//cellular response to phosphate starvation;GO:0044257//cellular protein catabolic process;GO:0055062//phosphate ion homeostasis;GO:2000185//regulation of phosphate transmembrane transport;	GO:0005783//endoplasmic reticulum;GO:0005794//Golgi apparatus;	GO:0031625//ubiquitin protein ligase binding;GO:0061630//ubiquitin protein ligase activity;	ko04120(Ubiquitin mediated proteolysis)
CsGy5G018740	1537.85	553.856	2521.84	4.55323	2.18689	0.0021154	0.0876877	Chr5	25172281	25174061	-	1236	-	GO:0005634;GO:0005737;GO:0016818;	K07766	virNOG19291	L	sp|Q9ZU95|NUD17_ARATH Nudix hydrolase 17, mitochondrial OS=Arabidopsis thaliana GN=NUDT17 PE=2 SV=1	nudix hydrolase 18, mitochondrial	-	GO:0005634//nucleus;GO:0005737//cytoplasm;	GO:0016818//hydrolase activity, acting on acid anhydrides, in phosphorus-containing anhydrides;	-
CsGy3G033130	833.218	43.1997	1623.24	37.5752	5.23171	0.00214786	0.0882378	Chr3	32168687	32169850	+	1164	-	GO:0004842;GO:0016567;GO:0016874;	-	virNOG07650	O	sp|Q84TG3|PUB23_ARATH E3 ubiquitin-protein ligase PUB23 OS=Arabidopsis thaliana GN=PUB23 PE=1 SV=1	RING-type E3 ubiquitin transferase	GO:0016567//protein ubiquitination;	-	GO:0004842//ubiquitin-protein transferase activity;GO:0016874//ligase activity;	-
CsGy6G018190	2240.26	1409.09	3071.42	2.17971	1.12414	0.00217718	0.0884607	Chr6	18950569	18957539	-	2305	-	-	-	virNOG13550	S	-	inactive purple acid phosphatase-like protein	-	-	-	-
CsGy3G001550	1952.35	527.247	3377.45	6.40582	2.67938	0.00238823	0.09406	Chr3	1162387	1164372	+	1986	-	GO:0003677;GO:0046983;	K13422	virNOG10242	K	sp|Q39204|MYC2_ARATH Transcription factor MYC2 OS=Arabidopsis thaliana GN=MYC2 PE=1 SV=2	transcription factor MYC2-like	-	-	GO:0003677//DNA binding;GO:0046983//protein dimerization activity;	ko04075(Plant hormone signal transduction);ko04016(MAPK signaling pathway - plant)
CsGy1G012160	241.923	149.334	334.512	2.24002	1.16351	0.00244695	0.0957481	Chr1	7646764	7648557	+	1794	-	GO:0004672;GO:0005524;GO:0006468;GO:0016021;GO:0030246;	-	virNOG05135	T	sp|Q9S9U1|LRK71_ARATH L-type lectin-domain containing receptor kinase VII.1 OS=Arabidopsis thaliana GN=LECRK71 PE=2 SV=1	Lectin-receptor like protein kinase 3	GO:0006468//protein phosphorylation;	GO:0016021//integral component of membrane;	GO:0004672//protein kinase activity;GO:0005524//ATP binding;GO:0030246//carbohydrate binding;	-
CsGy3G031410	40.2515	20.4493	60.0538	2.93672	1.55421	0.00253963	0.0978945	Chr3	31010306	31011082	+	777	-	GO:0003676;	-	virNOG23720;virNOG21115;virNOG19751	RK	sp|Q681X4|ZAT5_ARATH Zinc finger protein ZAT5 OS=Arabidopsis thaliana GN=ZAT5 PE=2 SV=1	zinc finger protein ZAT5-like	-	-	GO:0003676//nucleic acid binding;	-
CsGy2G023350	227.731	121.704	333.759	2.74239	1.45543	0.00267803	0.101079	Chr2	31349276	31349743	-	345	-	-	-	euNOG11402;virNOG14547	R	-	Unknown Protein	-	-	-	-
CsGy1G033230	112.285	73.5015	151.068	2.0553	1.03935	0.00270482	0.101327	Chr1	33048898	33050743	+	1037	-	-	-	virNOG25727;virNOG23367	R	sp|Q9SA16|P2A09_ARATH Protein PHLOEM PROTEIN 2-LIKE A9 OS=Arabidopsis thaliana GN=PP2A9 PE=2 SV=1	protein PHLOEM PROTEIN 2-LIKE A9-like	-	-	-	-
CsGy1G018190	127.547	81.7489	173.344	2.12045	1.08437	0.00281863	0.103594	Chr1	16292652	16293539	-	627	-	-	-	-	-	-	glycine-rich cell wall structural protein 2-like	-	-	-	-
CsGy2G013120	61.7372	36.3845	87.0899	2.3936	1.25918	0.00285745	0.104553	Chr2	12894316	12896938	+	1874	-	-	-	euNOG21447;NOG142092;virNOG14867	SR	sp|Q9T0I5|PRP4_ARATH Proline-rich protein 4 OS=Arabidopsis thaliana GN=PRP4 PE=2 SV=1	proline-rich protein 4-like	-	-	-	-
CsGy3G009120	226.098	7.12008	445.077	62.5101	5.96602	0.00291609	0.105484	Chr3	7421425	7421958	+	534	-	-	-	virNOG23897	R	sp|Q58FX0|BAP2_ARATH BON1-associated protein 2 OS=Arabidopsis thaliana GN=BAP2 PE=1 SV=1	BON1-associated protein 2-like	-	-	-	-
CsGy6G025630	3160.79	2105.98	4215.6	2.00173	1.00125	0.00294118	0.106146	Chr6	25155332	25160978	-	3089	-	GO:0005768;GO:0005802;GO:0008168;GO:0016021;GO:0032259;	-	virNOG01430	R	sp|Q8L7V3|PMTQ_ARATH Probable methyltransferase PMT26 OS=Arabidopsis thaliana GN=At5g64030 PE=2 SV=1	S-adenosyl-L-methionine-dependent methyltransferases superfamily protein	GO:0032259//methylation;	GO:0005768//endosome;GO:0005802//trans-Golgi network;GO:0016021//integral component of membrane;	GO:0008168//methyltransferase activity;	-
CsGy7G014520	64.5889	39.0724	90.1053	2.30611	1.20546	0.00304433	0.108358	Chr7	18550504	18554750	-	2398	-	GO:0016787;GO:0046856;	-	virNOG10600	U	sp|Q0WQ41|IP5P7_ARATH Type IV inositol polyphosphate 5-phosphatase 7 OS=Arabidopsis thaliana GN=IP5P7 PE=1 SV=1	type I inositol polyphosphate 5-phosphatase 4	GO:0046856//phosphatidylinositol dephosphorylation;	-	GO:0016787//hydrolase activity;	-
CsGy4G023980	93.6113	61.9227	125.3	2.02349	1.01685	0.00358485	0.121851	Chr4	29848417	29852028	+	2753	-	GO:0016021;GO:0055085;	-	virNOG03580	M	sp|Q9LYG9|MSL10_ARATH Mechanosensitive ion channel protein 10 OS=Arabidopsis thaliana GN=MSL10 PE=1 SV=1	mechanosensitive ion channel protein 10-like	GO:0055085//transmembrane transport;	GO:0016021//integral component of membrane;	-	-
CsGy6G015310	1099.83	703.55	1496.12	2.12653	1.0885	0.0036437	0.122701	Chr6	13875426	13876700	-	1275	-	GO:0004674;GO:0005524;GO:0005622;GO:0009268;GO:0018105;GO:0018107;GO:0035556;	K12761	virNOG06801	T	sp|O22932|CIPKB_ARATH CBL-interacting serine/threonine-protein kinase 11 OS=Arabidopsis thaliana GN=CIPK11 PE=1 SV=1	Non-specific serine/threonine protein kinase	GO:0009268//response to pH;GO:0018105//peptidyl-serine phosphorylation;GO:0018107//peptidyl-threonine phosphorylation;GO:0035556//intracellular signal transduction;	GO:0005622//intracellular anatomical structure;	GO:0004674//protein serine/threonine kinase activity;GO:0005524//ATP binding;	ko04138(Autophagy - yeast);ko04113(Meiosis - yeast)
CsGy2G023590	38.8867	21.0559	56.7176	2.69367	1.42957	0.00396902	0.129796	Chr2	31505529	31506203	-	675	-	GO:0003676;	-	virNOG24072;virNOG20740	R	sp|Q39262|ZFP3_ARATH Zinc finger protein 3 OS=Arabidopsis thaliana GN=ZFP3 PE=1 SV=1	zinc finger protein 3-like	-	-	GO:0003676//nucleic acid binding;	-
CsGy3G023670	4906.8	2250.6	7562.99	3.36043	1.74865	0.0042416	0.13458	Chr3	23531258	23533990	+	1770	-	GO:0006629;GO:0008081;	-	virNOG00209	R	sp|Q9SGA2|GDPD1_ARATH Glycerophosphodiester phosphodiesterase GDPD1, chloroplastic OS=Arabidopsis thaliana GN=GDPD1 PE=1 SV=1	glycerophosphodiester phosphodiesterase GDPD1, chloroplastic-like	GO:0006629//lipid metabolic process;	-	GO:0008081//phosphoric diester hydrolase activity;	-
CsGy3G009280	31.6028	15.0333	48.1724	3.20439	1.68005	0.00460622	0.142096	Chr3	7499195	7501178	+	1377	-	-	-	virNOG21210	S	-	DUF4378 domain protein	-	-	-	-
CsGy6G005110	73.1838	45.9013	100.466	2.18875	1.1301	0.00461182	0.142096	Chr6	4754958	4756581	-	339	-	-	-	-	-	-	Unknown Protein	-	-	-	-
CsGy5G003350	88.8638	58.3126	119.415	2.04784	1.0341	0.00489746	0.146899	Chr5	2204355	2206592	-	2238	-	GO:0004252;GO:0006508;	-	virNOG05065	O	sp|O64495|SBT12_ARATH Subtilisin-like protease SBT1.2 OS=Arabidopsis thaliana GN=SBT1.2 PE=2 SV=1	Subtilisin-like protease	GO:0006508//proteolysis;	-	GO:0004252//serine-type endopeptidase activity;	-
CsGy3G032850	48.8127	28.4219	69.2034	2.43486	1.28384	0.0049235	0.147369	Chr3	31974145	31974648	-	504	-	-	-	virNOG24094;virNOG22799	S	sp|Q3EAL1|OFP6_ARATH Transcription repressor OFP6 OS=Arabidopsis thaliana GN=OFP6 PE=1 SV=1	transcription repressor OFP6-like	-	-	-	-
CsGy2G001750	423.483	212.129	634.836	2.99269	1.58144	0.00505194	0.149797	Chr2	1199777	1200242	-	402	-	GO:0016036;	-	virNOG03688;KOG1161	P	sp|Q8LBH4|SPX1_ARATH SPX domain-containing protein 1 OS=Arabidopsis thaliana GN=SPX1 PE=1 SV=2	SPX domain-containing protein 1	GO:0016036//cellular response to phosphate starvation;	-	-	-
CsGy6G024800	177.75	46.7448	308.755	6.60513	2.72359	0.00509009	0.150416	Chr6	24573323	24576119	+	1463	-	GO:0016788;	-	virNOG06066;virNOG12193	OI	sp|Q9LZS7|GDL71_ARATH GDSL esterase/lipase At5g03610 OS=Arabidopsis thaliana GN=At5g03610 PE=2 SV=1	GDSL esterase/lipase At5g03610-like	-	-	GO:0016788//hydrolase activity, acting on ester bonds;	-
CsGy1G012360	403.774	14.0762	793.473	56.3697	5.81685	0.00524586	0.153042	Chr1	7777235	7777870	-	636	-	GO:0003677;GO:0003700;GO:0005634;GO:0006355;	-	virNOG15868;virNOG22551	K	sp|O80340|ERF78_ARATH Ethylene-responsive transcription factor 4 OS=Arabidopsis thaliana GN=ERF4 PE=1 SV=1	ethylene-responsive transcription factor 8	GO:0006355//regulation of transcription, DNA-templated;	GO:0005634//nucleus;	GO:0003677//DNA binding;GO:0003700//DNA-binding transcription factor activity;	-
CsGy4G018660	4.90095	0	9.80191	Inf	Inf	0.00547767	0.158355	Chr4	24232284	24236282	+	1418	-	GO:0004674;GO:0005524;GO:0005634;GO:0005737;GO:0006468;GO:0035556;	K14498	virNOG05783	T	sp|Q7XQP4|SAPK7_ORYSJ Serine/threonine-protein kinase SAPK7 OS=Oryza sativa subsp. japonica GN=SAPK7 PE=2 SV=2	Kinase family protein	GO:0006468//protein phosphorylation;GO:0035556//intracellular signal transduction;	GO:0005634//nucleus;GO:0005737//cytoplasm;	GO:0004674//protein serine/threonine kinase activity;GO:0005524//ATP binding;	ko04075(Plant hormone signal transduction);ko04016(MAPK signaling pathway - plant)
CsGy7G003880	21.5	8.48536	34.5147	4.06756	2.02416	0.00551457	0.158583	Chr7	2950442	2950852	+	252	-	-	-	euNOG25002;virNOG24825	R	-	Wound-responsive family protein	-	-	-	-
CsGy1G023510	1348.92	272.493	2425.35	8.90058	3.1539	0.00570284	0.161687	Chr1	22311559	22313513	+	1613	-	GO:0004722;GO:0006470;GO:0046872;	K17506	COG0631;virNOG01720	T	sp|O80871|P2C25_ARATH Probable protein phosphatase 2C 25 OS=Arabidopsis thaliana GN=At2g30020 PE=1 SV=1	probable protein phosphatase 2C 25	GO:0006470//protein dephosphorylation;	-	GO:0004722//protein serine/threonine phosphatase activity;GO:0046872//metal ion binding;	-
CsGy6G021870	376.767	182.165	571.369	3.13655	1.64918	0.0060915	0.16753	Chr6	22474333	22476346	+	1653	-	GO:0009693;GO:0009815;GO:0009835;GO:0031418;GO:0046872;GO:0055114;	K05933	virNOG00095	Q	sp|Q04644|ACCO1_CUCME 1-aminocyclopropane-1-carboxylate oxidase 1 OS=Cucumis melo GN=ACO1 PE=2 SV=1	1-aminocyclopropane-1-carboxylate oxidase 1	GO:0009693//ethylene biosynthetic process;GO:0009835//fruit ripening;GO:0055114//obsolete oxidation-reduction process;	-	GO:0009815//1-aminocyclopropane-1-carboxylate oxidase activity;GO:0031418//L-ascorbic acid binding;GO:0046872//metal ion binding;	ko00270(Cysteine and methionine metabolism)
CsGy1G005180	229.656	140.577	318.734	2.26733	1.18099	0.00621659	0.168969	Chr1	3474602	3475360	-	759	-	GO:0004857;GO:0005794;GO:0016021;GO:0043086;	-	virNOG34796	S	sp|Q43111|PME3_PHAVU Pectinesterase 3 OS=Phaseolus vulgaris GN=MPE3 PE=2 SV=1	pectinesterase 3	GO:0043086//negative regulation of catalytic activity;	GO:0005794//Golgi apparatus;GO:0016021//integral component of membrane;	GO:0004857//enzyme inhibitor activity;	-
CsGy2G004340	3101.53	956.582	5246.48	5.48461	2.45539	0.00662751	0.17447	Chr2	3016447	3017301	+	855	-	-	-	virNOG21164;virNOG11674	R	sp|O04133|SRC2_SOYBN Protein SRC2 OS=Glycine max GN=SRC2 PE=2 SV=1	protein SRC2-like	-	-	-	-
CsGy1G013770	10.4601	2.41436	18.5058	7.6649	2.93827	0.00662967	0.17447	Chr1	9345901	9350272	+	3517	-	GO:0016021;	-	virNOG00966	S	-	glycosyltransferase family protein 2	-	GO:0016021//integral component of membrane;	-	-
CsGy4G005550	32.8391	16.6495	49.0287	2.94475	1.55815	0.0067175	0.17447	Chr4	3972562	3973230	-	669	-	-	-	virNOG22476;virNOG19656	S	-	DUF4228 domain-containing protein	-	-	-	-
CsGy1G028600	13.5329	4.34435	22.7215	5.23013	2.38685	0.00674382	0.17447	Chr1	26744726	26746467	-	1068	-	GO:0016021;	-	virNOG24138	O	sp|D9UBX6|RTM2B_ARATH Inactive protein RESTRICTED TEV MOVEMENT 2 OS=Arabidopsis thaliana GN=RTM2 PE=3 SV=1	inactive protein RESTRICTED TEV MOVEMENT 2-like	-	GO:0016021//integral component of membrane;	-	-
CsGy5G004070	47.6665	28.2354	67.0976	2.37636	1.24876	0.00698567	0.178002	Chr5	2728544	2728966	+	423	-	-	-	virNOG21382;virNOG21135	R	sp|P14009|14KD_DAUCA 14 kDa proline-rich protein DC2.15 OS=Daucus carota PE=2 SV=1	14 kDa proline-rich protein DC2.15-like	-	-	-	-
CsGy5G022200	61.7562	37.5715	85.941	2.2874	1.19371	0.00711938	0.17964	Chr5	27702048	27702266	-	219	-	-	-	-	-	-	Unknown Protein	-	-	-	-
CsGy4G006890	152.33	87.9128	216.746	2.46547	1.30186	0.00721648	0.180831	Chr4	5025096	5028726	+	1968	-	GO:0005524;GO:0005886;GO:0016021;GO:0042626;GO:0055085;	-	virNOG00773	Q	sp|Q9C6W5|AB14G_ARATH ABC transporter G family member 14 OS=Arabidopsis thaliana GN=ABCG14 PE=2 SV=1	ABC transporter G family member 14	GO:0055085//transmembrane transport;	GO:0005886//plasma membrane;GO:0016021//integral component of membrane;	GO:0005524//ATP binding;GO:0042626//ATPase-coupled transmembrane transporter activity;	-
CsGy5G002380	5.31277	0.286944	10.3386	36.0299	5.17112	0.00734185	0.182338	Chr5	1509090	1511242	+	648	-	GO:0003677;	K09422	virNOG00283	K	sp|Q9SPG3|MYB26_ARATH Transcription factor MYB26 OS=Arabidopsis thaliana GN=MYB26 PE=2 SV=1	LOW QUALITY PROTEIN: transcription factor MYB86	-	-	GO:0003677//DNA binding;	-
CsGy1G019910	56.818	21.7578	91.8783	4.22278	2.07819	0.00740874	0.183364	Chr1	18718556	18723947	-	1422	-	GO:0004553;GO:0005618;GO:0010411;GO:0016762;GO:0042546;GO:0048046;GO:0071555;	K08235	virNOG07037	R	sp|Q38910|XTH23_ARATH Probable xyloglucan endotransglucosylase/hydrolase protein 23 OS=Arabidopsis thaliana GN=XTH23 PE=2 SV=1	Xyloglucan endotransglucosylase/hydrolase	GO:0010411//xyloglucan metabolic process;GO:0042546//cell wall biogenesis;GO:0071555//cell wall organization;	GO:0005618//cell wall;GO:0048046//apoplast;	GO:0004553//hydrolase activity, hydrolyzing O-glycosyl compounds;GO:0016762//xyloglucan:xyloglucosyl transferase activity;	-
CsGy5G003160	42.5381	18.8714	66.2048	3.5082	1.81073	0.00756432	0.185947	Chr5	2039594	2043291	+	2270	-	-	-	virNOG40799;virNOG20351	S	-	hypothetical protein	-	-	-	-
CsGy2G024660	10.7377	0.573889	20.9016	36.4209	5.1867	0.00760197	0.186115	Chr2	32355382	32361264	+	1624	-	GO:0005769;GO:0005886;GO:0015095;GO:0016021;GO:1903830;	-	virNOG07017	S	sp|Q94AH3|NIPA4_ARATH Probable magnesium transporter NIPA4 OS=Arabidopsis thaliana GN=At1g71900 PE=2 SV=1	Probable magnesium transporter	GO:1903830//magnesium ion transmembrane transport;	GO:0005769//early endosome;GO:0005886//plasma membrane;GO:0016021//integral component of membrane;	GO:0015095//magnesium ion transmembrane transporter activity;	-
CsGy3G020340	27.8582	13.1124	42.604	3.24913	1.70005	0.00770747	0.188189	Chr3	17054763	17057238	-	2379	-	-	-	virNOG12134;virNOG16896	SR	sp|Q9M886|LBD41_ARATH LOB domain-containing protein 41 OS=Arabidopsis thaliana GN=LBD41 PE=2 SV=1	LOB domain-containing protein 41	-	-	-	-
CsGy2G025720	125.025	28.2696	221.78	7.84517	2.97181	0.00798632	0.191305	Chr2	33179232	33182397	+	1215	-	GO:0000045;GO:0005634;GO:0005829;GO:0007030;GO:0019888;GO:0031468;GO:0043130;GO:0043161;GO:0043666;GO:0061025;	K14012	virNOG03930	Y	sp|Q7Y175|PUX5_ARATH Plant UBX domain-containing protein 5 OS=Arabidopsis thaliana GN=PUX5 PE=1 SV=1	plant UBX domain-containing protein 4	GO:0000045//autophagosome assembly;GO:0007030//Golgi organization;GO:0031468//nuclear membrane reassembly;GO:0043161//proteasome-mediated ubiquitin-dependent protein catabolic process;GO:0043666//regulation of phosphoprotein phosphatase activity;GO:0061025//membrane fusion;	GO:0005634//nucleus;GO:0005829//cytosol;	GO:0019888//protein phosphatase regulator activity;GO:0043130//ubiquitin binding;	ko04141(Protein processing in endoplasmic reticulum)
CsGy2G021450	179.22	20.9728	337.467	16.0907	4.00815	0.0082437	0.194468	Chr2	30106636	30107595	-	960	-	GO:0005743;GO:0006839;GO:0015116;GO:0015117;GO:0015131;GO:0015140;GO:0015141;GO:0015297;GO:0015709;GO:0016021;GO:0035435;GO:0071422;GO:0071423;GO:1902356;GO:1902358;	K15104	virNOG09017	C	sp|Q9SJY5|PUMP5_ARATH Mitochondrial uncoupling protein 5 OS=Arabidopsis thaliana GN=PUMP5 PE=2 SV=1	Mitochondrial substrate carrier family protein	GO:0006839//mitochondrial transport;GO:0015709//thiosulfate transport;GO:0035435//phosphate ion transmembrane transport;GO:0071422//succinate transmembrane transport;GO:0071423//malate transmembrane transport;GO:1902356//oxaloacetate(2-) transmembrane transport;GO:1902358//sulfate transmembrane transport;	GO:0005743//mitochondrial inner membrane;GO:0016021//integral component of membrane;	GO:0015116//sulfate transmembrane transporter activity;GO:0015117//thiosulfate transmembrane transporter activity;GO:0015131//oxaloacetate transmembrane transporter activity;GO:0015140//malate transmembrane transporter activity;GO:0015141//succinate transmembrane transporter activity;GO:0015297//antiporter activity;	-
CsGy4G016520	42.7684	24.7619	60.7749	2.45438	1.29536	0.00856159	0.199884	Chr4	21527945	21533117	+	261	-	-	-	-	-	-	Uncharacterized protein	-	-	-	-
CsGy2G024290	16.9485	6.80138	27.0957	3.98385	1.99416	0.00902832	0.207668	Chr2	32107969	32109360	+	1140	-	GO:0016021;GO:0016788;	-	virNOG01579	R	sp|Q9SF78|GDL29_ARATH GDSL esterase/lipase At1g71691 OS=Arabidopsis thaliana GN=At1g71691 PE=2 SV=1	GDSL esterase/lipase family	-	GO:0016021//integral component of membrane;	GO:0016788//hydrolase activity, acting on ester bonds;	-
CsGy3G020920	25.0736	2.41857	47.7287	19.7342	4.30263	0.00905755	0.207716	Chr3	18584145	18585647	-	488	-	GO:0006952;GO:0009607;	-	euNOG20118;virNOG21720	S	sp|Q9SSK7|MLP34_ARATH MLP-like protein 34 OS=Arabidopsis thaliana GN=MLP34 PE=2 SV=1	major latex protein 15-like	GO:0006952//defense response;GO:0009607//response to biotic stimulus;	-	-	-
CsGy2G009940	41.3946	23.5873	59.2019	2.50991	1.32763	0.00912333	0.20896	Chr2	9572350	9592375	+	1866	-	-	K03103	virNOG10144	R	sp|Q54ND5|MINP1_DICDI Multiple inositol polyphosphate phosphatase 1 OS=Dictyostelium discoideum GN=mipp1 PE=1 SV=1	multiple inositol polyphosphate phosphatase 1-like isoform X1	-	-	-	ko00562(Inositol phosphate metabolism);ko00010(Glycolysis / Gluconeogenesis)
CsGy7G019280	573.947	360.669	787.226	2.18269	1.12611	0.0091633	0.209611	Chr7	21903314	21904735	-	1342	-	GO:0046872;GO:0051213;GO:0055114;	K04124	virNOG03785	Q	sp|O24648|G3OX_PEA Gibberellin 3-beta-dioxygenase 1 OS=Pisum sativum GN=LE PE=1 SV=1	gibberellin 3-beta-dioxygenase 1-like	GO:0055114//obsolete oxidation-reduction process;	-	GO:0046872//metal ion binding;GO:0051213//dioxygenase activity;	ko00904(Diterpenoid biosynthesis)
CsGy1G026850	28.8694	14.7371	43.0017	2.91791	1.54494	0.00938568	0.212285	Chr1	25336838	25339025	-	1131	-	GO:0005618;GO:0030599;GO:0042545;GO:0045330;GO:0045490;	K01051	virNOG09117	G	sp|Q8VYZ3|PME53_ARATH Probable pectinesterase 53 OS=Arabidopsis thaliana GN=PME53 PE=2 SV=1	Pectinesterase	GO:0042545//cell wall modification;GO:0045490//pectin catabolic process;	GO:0005618//cell wall;	GO:0030599//pectinesterase activity;GO:0045330//aspartyl esterase activity;	ko02020(Two-component system);ko00040(Pentose and glucuronate interconversions)
CsGy5G016680	863.811	570.046	1157.58	2.03067	1.02196	0.00976818	0.217408	Chr5	23052231	23057210	+	2926	-	-	-	virNOG08538	S	sp|Q9SF32|IQD1_ARATH Protein IQ-DOMAIN 1 OS=Arabidopsis thaliana GN=IQD1 PE=1 SV=1	protein IQ-DOMAIN 1-like	-	-	-	-
CsGy6G030710	42.1463	15.2433	69.0492	4.52981	2.17945	0.0102342	0.223389	Chr6	28772183	28773969	-	1263	-	GO:0008168;GO:0032259;	K08241	virNOG05337	R	sp|Q9SPV4|SAMT_CLABR Salicylate carboxymethyltransferase OS=Clarkia breweri GN=SAMT PE=1 SV=1	salicylate carboxymethyltransferase-like isoform X1	GO:0032259//methylation;	-	GO:0008168//methyltransferase activity;	ko00592(alpha-Linolenic acid metabolism)
CsGy1G019960	808.369	393.749	1222.99	3.10602	1.63506	0.0103911	0.225727	Chr1	18744928	18746397	+	1299	-	GO:0004553;GO:0005618;GO:0010411;GO:0016762;GO:0042546;GO:0048046;GO:0071555;	-	virNOG07037	R	sp|Q38910|XTH23_ARATH Probable xyloglucan endotransglucosylase/hydrolase protein 23 OS=Arabidopsis thaliana GN=XTH23 PE=2 SV=1	Xyloglucan endotransglucosylase/hydrolase	GO:0010411//xyloglucan metabolic process;GO:0042546//cell wall biogenesis;GO:0071555//cell wall organization;	GO:0005618//cell wall;GO:0048046//apoplast;	GO:0004553//hydrolase activity, hydrolyzing O-glycosyl compounds;GO:0016762//xyloglucan:xyloglucosyl transferase activity;	-
CsGy3G004090	42.3896	25.3776	59.4015	2.3407	1.22694	0.0108554	0.23181	Chr3	3339284	3340009	+	543	-	-	-	-	-	-	Lipid binding protein	-	-	-	-
CsGy5G021660	268.801	178.963	358.639	2.00399	1.00287	0.0112399	0.234872	Chr5	27342817	27343595	+	363	-	GO:0016021;GO:0043161;GO:0046872;GO:0061630;	K16285	euNOG26727;virNOG24161;strNOG23762	O	-	probable E3 ubiquitin-protein ligase XERICO	GO:0043161//proteasome-mediated ubiquitin-dependent protein catabolic process;	GO:0016021//integral component of membrane;	GO:0046872//metal ion binding;GO:0061630//ubiquitin protein ligase activity;	-
CsGy4G023220	86.3859	42.8477	129.924	3.03223	1.60038	0.0115527	0.239005	Chr4	29348232	29353827	-	2096	-	GO:0004185;GO:0006508;	K16296	COG2939;virNOG14733	OE	sp|Q8VZU3|SCP19_ARATH Serine carboxypeptidase-like 19 OS=Arabidopsis thaliana GN=SCPL19 PE=1 SV=1	serine carboxypeptidase-like 2	GO:0006508//proteolysis;	-	GO:0004185//serine-type carboxypeptidase activity;	-
CsGy1G018890	613.392	66.3334	1160.45	17.4942	4.12881	0.0129184	0.253601	Chr1	17138245	17141338	-	1415	-	GO:0005783;GO:0016036;	-	virNOG03688	P	sp|O48781|SPX2_ARATH SPX domain-containing protein 2 OS=Arabidopsis thaliana GN=SPX2 PE=2 SV=1	SPX domain-containing protein 1	GO:0016036//cellular response to phosphate starvation;	GO:0005783//endoplasmic reticulum;	-	-
CsGy5G029010	103.354	40.6041	166.103	4.09079	2.03238	0.0129335	0.253601	Chr5	32473388	32475121	-	1439	-	-	-	NOG170489;virNOG19682	OR	sp|Q7M1X5|LOLB_LOLPR Major pollen allergen Lol p 11 OS=Lolium perenne PE=1 SV=1	Pollen Ole e 1 allergen/extensin	-	-	-	-
CsGy1G018760	1711.84	1059.43	2364.24	2.23161	1.15808	0.0129994	0.25401	Chr1	16971415	16978260	+	3085	-	GO:0006857;GO:0016021;GO:0022857;GO:0055085;	K14638	virNOG09195	P	sp|Q9SZY4|PTR27_ARATH Protein NRT1/ PTR FAMILY 6.2 OS=Arabidopsis thaliana GN=NPF6.2 PE=1 SV=1	protein NRT1/ PTR FAMILY 6.2-like	GO:0006857//oligopeptide transport;GO:0055085//transmembrane transport;	GO:0016021//integral component of membrane;	GO:0022857//transmembrane transporter activity;	-
CsGy1G000990	97.394	18.9484	175.84	9.27994	3.21412	0.0130474	0.25401	Chr1	563001	565294	+	1803	-	GO:0016021;	-	virNOG22960	S	-	Octicosapeptide/Phox/Bem1p family protein	-	GO:0016021//integral component of membrane;	-	-
CsGy5G030530	390.868	216.996	564.739	2.60253	1.37992	0.0142701	0.26582	Chr5	33498932	33501292	-	1508	-	GO:0016788;	-	virNOG11805	R	sp|Q8L5Z1|GDL17_ARATH GDSL esterase/lipase At1g33811 OS=Arabidopsis thaliana GN=At1g33811 PE=2 SV=1	GDSL esterase/lipase	-	-	GO:0016788//hydrolase activity, acting on ester bonds;	-
CsGy7G012830	39.7777	24.1604	55.3949	2.29279	1.19711	0.0143879	0.267228	Chr7	16606360	16614462	+	2685	-	GO:0004672;GO:0005524;GO:0006468;GO:0016021;	-	virNOG14110	T	sp|C0LGV0|Y5487_ARATH Probable LRR receptor-like serine/threonine-protein kinase At5g48740 OS=Arabidopsis thaliana GN=At5g48740 PE=2 SV=1	probable LRR receptor-like serine/threonine-protein kinase isoform X1	GO:0006468//protein phosphorylation;	GO:0016021//integral component of membrane;	GO:0004672//protein kinase activity;GO:0005524//ATP binding;	-
CsGy2G004570	849.8	108.8	1590.8	14.6213	3.87	0.014725	0.270013	Chr2	3153173	3163138	+	3696	-	GO:0004630;GO:0005773;GO:0006654;GO:0006995;GO:0009395;GO:0009733;GO:0016036;GO:0019375;GO:0048017;GO:0048364;GO:0060627;GO:0070290;	K01115	virNOG09729;virNOG28910	I	sp|Q9LRZ5|PLDZ1_ARATH Phospholipase D zeta 1 OS=Arabidopsis thaliana GN=PLDZETA1 PE=1 SV=1	Phospholipase	GO:0006654//phosphatidic acid biosynthetic process;GO:0006995//cellular response to nitrogen starvation;GO:0009395//phospholipid catabolic process;GO:0009733//response to auxin;GO:0016036//cellular response to phosphate starvation;GO:0019375//galactolipid biosynthetic process;GO:0048017//inositol lipid-mediated signaling;GO:0048364//root development;GO:0060627//regulation of vesicle-mediated tran…	GO:0005773//vacuole;	GO:0004630//phospholipase D activity;GO:0070290//N-acylphosphatidylethanolamine-specific phospholipase D activity;	ko05231(Choline metabolism in cancer);ko05212(Pancreatic cancer);ko05208(Chemical carcinogenesis - reactive oxygen species);ko05200(Pathways in cancer);ko04928(Parathyroid hormone synthesis, secretion and action);ko04912(GnRH signaling pathway);ko04724(Glutamatergic synapse);ko04666(Fc gamma R-mediated phagocytosis);ko04144(Endocytosis);ko04072(Phospholipase D signaling pathway);ko04071(Sphingoli…
CsGy4G010710	4.36224	0	8.72448	Inf	Inf	0.0150466	0.272872	Chr4	9812444	9813714	+	541	-	-	K16280	NOG05847;virNOG01196	OR	sp|Q8RX26|RGLG3_ARATH E3 ubiquitin-protein ligase RGLG3 OS=Arabidopsis thaliana GN=RGLG3 PE=1 SV=1	Unknown Protein	-	-	-	-
CsGy2G001530	350.342	198.158	502.527	2.53599	1.34255	0.0164449	0.287189	Chr2	1052775	1056019	+	2161	-	GO:0005506;GO:0008395;GO:0009741;GO:0010268;GO:0016021;GO:0016131;GO:0016705;GO:0020037;GO:0055114;	K15639	virNOG04939	Q	sp|O48786|C734A_ARATH Cytochrome P450 734A1 OS=Arabidopsis thaliana GN=CYP734A1 PE=2 SV=1	Cytochrome P450	GO:0009741//response to brassinosteroid;GO:0010268//brassinosteroid homeostasis;GO:0016131//brassinosteroid metabolic process;GO:0055114//obsolete oxidation-reduction process;	GO:0016021//integral component of membrane;	GO:0005506//iron ion binding;GO:0008395//steroid hydroxylase activity;GO:0016705//oxidoreductase activity, acting on paired donors, with incorporation or reduction of molecular oxygen;GO:0020037//heme binding;	ko00905(Brassinosteroid biosynthesis)
CsGy1G026670	49.8945	32.1413	67.6477	2.1047	1.07361	0.0166732	0.288508	Chr1	25214380	25230199	+	4231	-	GO:0001172;GO:0003723;GO:0003968;GO:0031047;	K11699	virNOG10214	A	sp|O82188|RDR5_ARATH Probable RNA-dependent RNA polymerase 5 OS=Arabidopsis thaliana GN=RDR5 PE=2 SV=2	RNA-dependent RNA polymerase	GO:0001172//transcription, RNA-templated;GO:0031047//gene silencing by RNA;	-	GO:0003723//RNA binding;GO:0003968//RNA-directed 5'-3' RNA polymerase activity;	-
CsGy4G015430	52.5168	33.2849	71.7486	2.15559	1.10808	0.0173708	0.29433	Chr4	20123112	20124514	+	1316	-	GO:0016301;GO:0016310;	-	-	-	-	cyclin-dependent kinase 11B-like	GO:0016310//phosphorylation;	-	GO:0016301//kinase activity;	-
CsGy2G001740	138.899	77.1927	200.606	2.59876	1.37783	0.0182658	0.301133	Chr2	1198254	1199742	-	798	-	GO:0005783;GO:0016036;	-	virNOG03688	P	sp|O48781|SPX2_ARATH SPX domain-containing protein 2 OS=Arabidopsis thaliana GN=SPX2 PE=2 SV=1	SPX domain-containing protein 1	GO:0016036//cellular response to phosphate starvation;	GO:0005783//endoplasmic reticulum;	-	-
CsGy2G001770	24.4759	12.455	36.4968	2.9303	1.55105	0.0182671	0.301133	Chr2	1210787	1211409	+	528	-	GO:0016021;	-	-	-	-	cytochrome P450 family protein	-	GO:0016021//integral component of membrane;	-	-
CsGy1G003810	41.7309	15.0643	68.3976	4.54039	2.18282	0.0182999	0.301329	Chr1	2395224	2397563	-	1528	-	GO:0046983;	-	NOG136572;virNOG18645	K	sp|Q8GZ13|BEE1_ARATH Transcription factor BEE 1 OS=Arabidopsis thaliana GN=BEE1 PE=2 SV=1	transcription factor BEE 3-like	-	-	GO:0046983//protein dimerization activity;	-
CsGy3G010550	7.88053	1.91661	13.8445	7.22342	2.85268	0.0185779	0.30295	Chr3	8315752	8319405	-	1857	-	-	-	virNOG08117	R	sp|Q9LF66|Y5758_ARATH BTB/POZ domain-containing protein At5g17580 OS=Arabidopsis thaliana GN=At5g17580 PE=2 SV=1	BTB/POZ domain-containing protein isoform X1	-	-	-	-
CsGy5G016650	11.6267	4.19629	19.057	4.5414	2.18314	0.018578	0.30295	Chr5	23046515	23047375	+	861	-	-	-	virNOG24454;virNOG37161	S	-	hypothetical protein	-	-	-	-
CsGy2G003840	762.944	478.88	1047.01	2.18636	1.12853	0.0188469	0.305411	Chr2	2617366	2618505	+	1140	-	GO:0016021;	K10664	virNOG15947	O	sp|Q8RXX9|ATL6_ARATH E3 ubiquitin-protein ligase ATL6 OS=Arabidopsis thaliana GN=ATL6 PE=1 SV=2	E3 ubiquitin-protein ligase ATL6	-	GO:0016021//integral component of membrane;	-	-
CsGy1G006800	17.6205	8.24032	27.0006	3.27665	1.71222	0.0189	0.305573	Chr1	4361336	4363408	+	1182	-	GO:0005789;GO:0016021;	-	virNOG18060	U	sp|Q9LJQ5|RTNLI_ARATH Reticulon-like protein B9 OS=Arabidopsis thaliana GN=RTNLB9 PE=2 SV=1	Reticulon-like protein	-	GO:0005789//endoplasmic reticulum membrane;GO:0016021//integral component of membrane;	-	-
CsGy6G035840	49.246	32.2619	66.2301	2.05289	1.03766	0.0191681	0.308136	Chr6	31528113	31530338	+	507	-	-	K14807	virNOG08315	A	sp|Q7FGZ2|RH1_ARATH DEAD-box ATP-dependent RNA helicase 1 OS=Arabidopsis thaliana GN=RH1 PE=2 SV=3	galactosyltransferase family protein	-	-	-	-
CsGy4G017350	811.98	530.642	1093.32	2.06037	1.0429	0.0199638	0.316352	Chr4	22354129	22357793	+	2633	-	GO:0004372;GO:0008168;GO:0019264;GO:0030170;GO:0032259;GO:0035999;	K00600	virNOG01900	E	sp|Q84WV0|GLYC7_ARATH Serine hydroxymethyltransferase 7 OS=Arabidopsis thaliana GN=SHM7 PE=2 SV=1	Serine hydroxymethyltransferase	GO:0019264//glycine biosynthetic process from serine;GO:0032259//methylation;GO:0035999//tetrahydrofolate interconversion;	-	GO:0004372//glycine hydroxymethyltransferase activity;GO:0008168//methyltransferase activity;GO:0030170//pyridoxal phosphate binding;	ko01523(Antifolate resistance);ko00680(Methane metabolism);ko00670(One carbon pool by folate);ko00630(Glyoxylate and dicarboxylate metabolism);ko00460(Cyanoamino acid metabolism);ko00260(Glycine, serine and threonine metabolism)
CsGy2G015840	744.943	476.148	1013.74	2.12904	1.0902	0.0201532	0.318045	Chr2	15792316	15794222	+	1896	-	GO:0005524;GO:0016021;GO:0016887;	K05681	virNOG04202	Q	sp|Q9SIT6|AB5G_ARATH ABC transporter G family member 5 OS=Arabidopsis thaliana GN=ABCG5 PE=2 SV=1	ABC transporter G family member 5	-	GO:0016021//integral component of membrane;	GO:0005524//ATP binding;GO:0016887//ATP hydrolysis activity;	ko04976(Bile secretion);ko02010(ABC transporters);ko01523(Antifolate resistance)
CsGy7G002950	20.7342	10.5693	30.8991	2.92347	1.54768	0.0206282	0.322728	Chr7	2343494	2345422	-	1618	-	GO:0008171;GO:0032259;GO:0046983;	-	virNOG01933	R	sp|B0ZB57|OMT3_HUMLU Probable O-methyltransferase 3 OS=Humulus lupulus GN=OMT3 PE=2 SV=1	Putative O-methyltransferase	GO:0032259//methylation;	-	GO:0008171//O-methyltransferase activity;GO:0046983//protein dimerization activity;	-
CsGy6G033860	1455.08	400.797	2509.36	6.26091	2.64637	0.0213011	0.327878	Chr6	30316700	30319066	-	1976	-	-	-	virNOG08820;virNOG19628	R	sp|Q8GX77|FB316_ARATH F-box protein At1g61340 OS=Arabidopsis thaliana GN=At1g61340 PE=2 SV=1	F-box protein At4g05010-like	-	-	-	-
CsGy6G013770	623.25	389.888	856.613	2.19707	1.13558	0.0213554	0.327878	Chr6	12237959	12240482	+	1334	-	GO:0002094;GO:0009570;GO:0009668;	K11778	virNOG13209	I	sp|Q56Y11|DDPS2_ARATH Dehydrodolichyl diphosphate synthase 2 OS=Arabidopsis thaliana GN=At5g58770 PE=2 SV=2	Alkyl transferase	GO:0009668//plastid membrane organization;	GO:0009570//chloroplast stroma;	GO:0002094//polyprenyltransferase activity;	ko00900(Terpenoid backbone biosynthesis)
CsGy2G026020	10.7594	3.83321	17.6855	4.61375	2.20594	0.0216947	0.329301	Chr2	33554333	33558535	+	2097	-	GO:0004888;GO:0007165;GO:0016020;	K05387	virNOG07447	P	sp|Q8GXJ4|GLR34_ARATH Glutamate receptor 3.4 OS=Arabidopsis thaliana GN=GLR3.4 PE=2 SV=2	Glutamate receptor	GO:0007165//signal transduction;	GO:0016020//membrane;	GO:0004888//transmembrane signaling receptor activity;	-
CsGy5G026030	8.04105	2.21024	13.8719	6.27616	2.64988	0.0217026	0.329301	Chr5	30098437	30099947	+	512	-	GO:0016021;	-	virNOG26663	S	-	hypothetical protein	-	GO:0016021//integral component of membrane;	-	-
CsGy4G020160	242.031	86.0374	398.025	4.62619	2.20982	0.0221228	0.333372	Chr4	27033025	27034713	-	1689	-	GO:0003735;GO:0004190;GO:0005840;GO:0006412;GO:0006508;GO:0016021;GO:0030163;	-	virNOG11392	O	sp|Q9LNJ3|APF2_ARATH Aspartyl protease family protein 2 OS=Arabidopsis thaliana GN=APF2 PE=2 SV=1	Eukaryotic aspartyl protease family protein	GO:0006412//translation;GO:0006508//proteolysis;GO:0030163//protein catabolic process;	GO:0005840//ribosome;GO:0016021//integral component of membrane;	GO:0003735//structural constituent of ribosome;GO:0004190//aspartic-type endopeptidase activity;	-
CsGy3G028740	899.658	575.887	1223.43	2.12442	1.08707	0.0223659	0.335155	Chr3	29571047	29572087	+	690	-	GO:0016021;	K20359	virNOG16544	U	sp|O80915|PR1B4_ARATH PRA1 family protein B4 OS=Arabidopsis thaliana GN=PRA1B4 PE=1 SV=1	PRA1 family protein	-	GO:0016021//integral component of membrane;	-	-
CsGy2G022980	11.5254	4.10008	18.9508	4.62206	2.20854	0.0224122	0.335266	Chr2	31125728	31130475	+	2573	-	GO:0005452;GO:0015698;GO:0016021;	-	virNOG02918	P	sp|Q3E954|BOR6_ARATH Probable boron transporter 6 OS=Arabidopsis thaliana GN=BOR6 PE=2 SV=2	Boron transporter 4	GO:0015698//inorganic anion transport;	GO:0016021//integral component of membrane;	GO:0005452//inorganic anion exchanger activity;	-
CsGy3G012180	29.2811	16.3601	42.2021	2.57957	1.36713	0.0224473	0.335266	Chr3	9257362	9258330	+	969	-	GO:0016021;	K19041	virNOG12965	O	sp|Q9LSW9|ATL16_ARATH RING-H2 finger protein ATL16 OS=Arabidopsis thaliana GN=ATL16 PE=2 SV=1	RING-H2 finger protein ATL16	-	GO:0016021//integral component of membrane;	-	-
CsGy6G027240	4.33394	0.28025	8.38763	29.9291	4.90347	0.0225175	0.335715	Chr6	26468286	26469311	-	741	-	-	-	virNOG29181;virNOG12013	IR	sp|Q8S8S9|MES1_ARATH Methylesterase 1 OS=Arabidopsis thaliana GN=MES1 PE=1 SV=1	methyl esterase 1	-	-	-	-
CsGy3G016670	689.261	129.955	1248.57	9.60772	3.26419	0.0227096	0.336962	Chr3	12376688	12377236	-	549	-	GO:0003677;GO:0003700;GO:0005634;GO:0006355;	K09286	virNOG10158;virNOG17335	K	sp|P93835|DRE1B_ARATH Dehydration-responsive element-binding protein 1B OS=Arabidopsis thaliana GN=DREB1B PE=1 SV=2	Ethylene-responsive transcription factor 10	GO:0006355//regulation of transcription, DNA-templated;	GO:0005634//nucleus;	GO:0003677//DNA binding;GO:0003700//DNA-binding transcription factor activity;	-
CsGy4G024940	357.974	210.771	505.178	2.39681	1.26111	0.0230196	0.339337	Chr4	30519507	30520151	-	645	-	-	-	virNOG20827	S	-	serine-rich protein-like protein	-	-	-	-
CsGy1G024050	98.5488	22.6326	174.465	7.70859	2.94647	0.0235462	0.342515	Chr1	22854004	22855608	-	1605	-	GO:0005739;GO:0006629;GO:0008970;GO:0010214;	-	virNOG00304	I	sp|Q3EBR6|PLA16_ARATH Phospholipase A1-Igamma2, chloroplastic OS=Arabidopsis thaliana GN=At2g30550 PE=1 SV=2	phospholipase A1-Igamma1, chloroplastic	GO:0006629//lipid metabolic process;GO:0010214//seed coat development;	GO:0005739//mitochondrion;	GO:0008970//phospholipase A1 activity;	-
CsGy3G018840	4.70283	0.356387	9.04928	25.3917	4.66629	0.0237472	0.343358	Chr3	14974916	14977846	-	1850	-	GO:0045735;	-	virNOG09232	S	sp|Q02897|GLUB2_ORYSJ Glutelin type-B 2 OS=Oryza sativa subsp. japonica GN=GLUB2 PE=2 SV=2	glutelin type-B 5	-	-	GO:0045735//nutrient reservoir activity;	-
CsGy5G007850	3.51145	0	7.02289	Inf	Inf	0.023954	0.343879	Chr5	5585304	5590428	+	1957	-	GO:0003333;GO:0005886;GO:0015171;GO:0016021;	K13946	virNOG02353	E	sp|Q9FEL8|LAX1_MEDTR Auxin transporter-like protein 1 OS=Medicago truncatula GN=LAX1 PE=2 SV=1	auxin transporter-like protein 1	GO:0003333//amino acid transmembrane transport;	GO:0005886//plasma membrane;GO:0016021//integral component of membrane;	GO:0015171//amino acid transmembrane transporter activity;	ko04075(Plant hormone signal transduction)
CsGy3G039970	70.2178	20.138	120.298	5.97365	2.57861	0.0240622	0.343972	Chr3	37528887	37529915	-	1029	-	GO:0016757;	-	virNOG05321	G	sp|Q9LN68|GATL1_ARATH Probable galacturonosyltransferase-like 1 OS=Arabidopsis thaliana GN=GATL1 PE=2 SV=1	Hexosyltransferase	-	-	GO:0016757//glycosyltransferase activity;	-
CsGy1G010200	14.9043	5.22527	24.5834	4.70472	2.23411	0.0241492	0.343995	Chr1	6357489	6359273	-	393	-	GO:0016021;	-	-	-	-	ankyrin repeat-containing protein At5g02620-like isoform X1	-	GO:0016021//integral component of membrane;	-	-
CsGy4G022460	23.4336	7.66221	39.2051	5.11668	2.35521	0.0243626	0.345635	Chr4	28926161	28926877	-	717	-	GO:0046983;	-	virNOG07212	K	sp|Q9SND4|HEC2_ARATH Transcription factor HEC2 OS=Arabidopsis thaliana GN=HEC2 PE=1 SV=1	transcription factor HEC2-like	-	-	GO:0046983//protein dimerization activity;	-
CsGy2G020650	79.7637	50.8404	108.687	2.13781	1.09613	0.0252755	0.351733	Chr2	29550054	29551298	+	1166	-	GO:0016021;	-	virNOG01991	R	sp|A0A1P8B554|THLP1_ARATH Thaumatin-like protein 1 OS=Arabidopsis thaliana GN=TLP1 PE=2 SV=1	thaumatin-like protein 1b	-	GO:0016021//integral component of membrane;	-	-
CsGy6G024890	43.8123	28.2563	59.3682	2.10106	1.07112	0.0254781	0.35282	Chr6	24617055	24622231	+	1846	-	GO:0003993;GO:0016311;GO:0046872;	-	virNOG13836	G	sp|Q9LXI7|PPA20_ARATH Probable purple acid phosphatase 20 OS=Arabidopsis thaliana GN=PAP20 PE=2 SV=1	Purple acid phosphatase	GO:0016311//dephosphorylation;	-	GO:0003993//acid phosphatase activity;GO:0046872//metal ion binding;	-
CsGy1G009380	253.118	52.4577	453.777	8.65036	3.11276	0.0257129	0.354233	Chr1	5832383	5833216	-	834	-	-	-	virNOG21769;virNOG17405	S	-	von willebrand factor A domain protein	-	-	-	-
CsGy6G018550	76.6804	38.926	114.435	2.9398	1.55572	0.0257804	0.354308	Chr6	19302569	19303759	-	1191	-	-	-	virNOG18759;virNOG09632	S	sp|Q9SLL2|BIG1B_ARATH Protein BIG GRAIN 1-like B OS=Arabidopsis thaliana GN=At1g54200 PE=2 SV=1	protein BIG GRAIN 1-like A	-	-	-	-
CsGy5G011060	20.5008	10.0699	30.9317	3.07171	1.61904	0.0277049	0.367597	Chr5	11701641	11702186	-	546	-	-	-	virNOG20715	S	-	plant/protein (Protein of unknown function%2C DUF538)	-	-	-	-
CsGy1G011260	15.4183	1.14778	29.6888	25.8663	4.693	0.0280641	0.370042	Chr1	7024588	7029752	-	252	-	GO:0004842;GO:0005634;GO:0005737;GO:0009611;GO:0009867;GO:0016567;GO:0016874;GO:0042742;	K16280	NOG05847;virNOG01196	OR	sp|Q8RX26|RGLG3_ARATH E3 ubiquitin-protein ligase RGLG3 OS=Arabidopsis thaliana GN=RGLG3 PE=1 SV=1	E3 ubiquitin-protein ligase RGLG1 isoform X2	GO:0009611//response to wounding;GO:0009867//jasmonic acid mediated signaling pathway;GO:0016567//protein ubiquitination;GO:0042742//defense response to bacterium;	GO:0005634//nucleus;GO:0005737//cytoplasm;	GO:0004842//ubiquitin-protein transferase activity;GO:0016874//ligase activity;	-
CsGy6G030750	8.31521	1.97514	14.6553	7.41986	2.89139	0.0294093	0.37715	Chr6	28798772	28799645	+	773	-	GO:0005737;GO:0030001;GO:0046914;GO:0046916;	-	virNOG24813;euNOG28459;virNOG20332	SPR	sp|Q9SFF7|HIP43_ARATH Heavy metal-associated isoprenylated plant protein 43 OS=Arabidopsis thaliana GN=HIPP43 PE=2 SV=1	heavy metal-associated isoprenylated plant protein 3-like	GO:0030001//metal ion transport;GO:0046916//cellular transition metal ion homeostasis;	GO:0005737//cytoplasm;	GO:0046914//transition metal ion binding;	-
CsGy3G023640	28.7223	14.2587	43.1859	3.02874	1.59872	0.0314599	0.387991	Chr3	23469419	23481443	+	4634	-	GO:0005524;GO:0016021;GO:0016887;	-	virNOG02670	Q	sp|Q949G3|PDR1_NICPL Pleiotropic drug resistance protein 1 OS=Nicotiana plumbaginifolia GN=PDR1 PE=1 SV=1	ABC transporter G family member 40	-	GO:0016021//integral component of membrane;	GO:0005524//ATP binding;GO:0016887//ATP hydrolysis activity;	-
CsGy6G035080	31.6115	19.4488	43.7742	2.25074	1.1704	0.0315483	0.388553	Chr6	31036134	31037176	+	666	-	-	-	virNOG00868	S	-	Uncharacterized protein	-	-	-	-
CsGy2G000430	65.6704	40.1299	91.211	2.27289	1.18453	0.0316963	0.389455	Chr2	288833	290440	+	1608	-	GO:0005737;GO:0048510;GO:0055114;GO:1990534;	K12259	virNOG09716	H	sp|Q9SU79|PAO5_ARATH Probable polyamine oxidase 5 OS=Arabidopsis thaliana GN=PAO5 PE=2 SV=1	probable polyamine oxidase 5	GO:0048510//regulation of timing of transition from vegetative to reproductive phase;GO:0055114//obsolete oxidation-reduction process;	GO:0005737//cytoplasm;	GO:1990534//thermospermine oxidase activity;	ko00410(beta-Alanine metabolism);ko00330(Arginine and proline metabolism)
CsGy1G016460	44.6964	28.3716	61.0211	2.15078	1.10486	0.0322104	0.39168	Chr1	13573178	13573635	-	410	-	-	-	-	-	-	Unknown Protein	-	-	-	-
CsGy6G020690	911.945	594.587	1229.3	2.06749	1.04788	0.0328499	0.394192	Chr6	21371995	21373702	-	1053	-	GO:0003700;GO:0005634;GO:0007623;GO:0008270;GO:0009845;GO:0043565;GO:0045893;	-	virNOG01002	K	sp|Q9SV30|GATA8_ARATH GATA transcription factor 8 OS=Arabidopsis thaliana GN=GATA8 PE=2 SV=1	GATA transcription factor	GO:0007623//circadian rhythm;GO:0009845//seed germination;GO:0045893//positive regulation of transcription, DNA-templated;	GO:0005634//nucleus;	GO:0003700//DNA-binding transcription factor activity;GO:0008270//zinc ion binding;GO:0043565//sequence-specific DNA binding;	-
CsGy6G009930	9.8576	3.55966	16.1555	4.53851	2.18222	0.0330005	0.395156	Chr6	8411406	8413861	+	1390	-	GO:0004499;GO:0050660;GO:0050661;GO:0055114;	K00485	virNOG09533	Q	sp|Q9LMA1|FMO1_ARATH Probable flavin-containing monooxygenase 1 OS=Arabidopsis thaliana GN=FMO1 PE=2 SV=1	Flavin-containing monooxygenase	GO:0055114//obsolete oxidation-reduction process;	-	GO:0004499//N,N-dimethylaniline monooxygenase activity;GO:0050660//flavin adenine dinucleotide binding;GO:0050661//NADP binding;	ko00982(Drug metabolism - cytochrome P450)
CsGy7G007730	6.54131	0	13.0826	Inf	Inf	0.0345557	0.406787	Chr7	5633879	5637716	+	1163	-	GO:0010468;GO:0046872;GO:0051252;	-	virNOG40530;virNOG09507	R	sp|F4K3G5|EDM2_ARATH Protein ENHANCED DOWNY MILDEW 2 OS=Arabidopsis thaliana GN=EDM2 PE=1 SV=1	protein ENHANCED DOWNY MILDEW 2-like	GO:0010468//regulation of gene expression;GO:0051252//regulation of RNA metabolic process;	-	GO:0046872//metal ion binding;	-
CsGy7G002020	25.7596	15.4675	36.0516	2.33079	1.22082	0.034806	0.408317	Chr7	1700940	1703973	+	2298	-	GO:0004420;GO:0005789;GO:0008299;GO:0015936;GO:0016021;GO:0050661;GO:0055114;	K00021	virNOG07933;COG1257	I	sp|O64966|HMDH1_GOSHI 3-hydroxy-3-methylglutaryl-coenzyme A reductase 1 OS=Gossypium hirsutum GN=HMG1 PE=3 SV=1	3-hydroxy-3-methylglutaryl coenzyme A reductase	GO:0008299//isoprenoid biosynthetic process;GO:0015936//coenzyme A metabolic process;GO:0055114//obsolete oxidation-reduction process;	GO:0005789//endoplasmic reticulum membrane;GO:0016021//integral component of membrane;	GO:0004420//hydroxymethylglutaryl-CoA reductase (NADPH) activity;GO:0050661//NADP binding;	ko04976(Bile secretion);ko04152(AMPK signaling pathway);ko00900(Terpenoid backbone biosynthesis)
CsGy3G011120	3.8702	0.28025	7.46016	26.6196	4.73442	0.0348634	0.408476	Chr3	8651948	8653095	+	987	-	GO:0009846;GO:0016021;GO:0016760;GO:0030244;GO:0071555;	-	virNOG11549;virNOG03814	G	sp|O49323|CSLD1_ARATH Cellulose synthase-like protein D1 OS=Arabidopsis thaliana GN=CSLD1 PE=2 SV=1	cellulose synthase-like protein D1	GO:0009846//pollen germination;GO:0030244//cellulose biosynthetic process;GO:0071555//cell wall organization;	GO:0016021//integral component of membrane;	GO:0016760//cellulose synthase (UDP-forming) activity;	-
CsGy2G023990	5.16439	0.643332	9.68546	15.0552	3.91219	0.0356993	0.41216	Chr2	31763442	31768790	-	378	-	-	-	-	-	-	Unknown Protein	-	-	-	-
CsGy4G018520	31.7225	16.243	47.2019	2.90598	1.53902	0.0365538	0.417821	Chr4	24119777	24122469	+	348	-	GO:0016491;GO:0055114;	-	virNOG00608	R	sp|P28475|S6PD_MALDO NADP-dependent D-sorbitol-6-phosphate dehydrogenase OS=Malus domestica GN=S6PDH PE=2 SV=1	NAD(P)-linked oxidoreductase superfamily protein	GO:0055114//obsolete oxidation-reduction process;	-	GO:0016491//oxidoreductase activity;	-
CsGy6G013340	18.612	6.20243	31.0216	5.00152	2.32237	0.0377861	0.422313	Chr6	11765586	11766969	-	1000	-	GO:0016021;	K17279	virNOG12576;KOG1725;virNOG18255	SU	sp|Q682H0|HA22F_ARATH HVA22-like protein f OS=Arabidopsis thaliana GN=HVA22F PE=2 SV=1	HVA22-like protein	-	GO:0016021//integral component of membrane;	-	-
CsGy7G011500	161.158	107.241	215.076	2.00554	1.00399	0.0379355	0.42258	Chr7	14516685	14520618	+	1721	-	GO:0016788;	-	virNOG09276	R	sp|O23470|GDL64_ARATH GDSL esterase/lipase At4g16230 OS=Arabidopsis thaliana GN=At4g16230 PE=3 SV=2	GDSL esterase/lipase At4g16230-like	-	-	GO:0016788//hydrolase activity, acting on ester bonds;	-
CsGy3G028670	1198.9	366.868	2030.92	5.53585	2.4688	0.0390712	0.426674	Chr3	29531602	29540854	-	8520	-	GO:0016491;GO:0055114;	-	virNOG01090	R	sp|P23901|ALDR_HORVU Aldose reductase OS=Hordeum vulgare PE=1 SV=1	aldose reductase	GO:0055114//obsolete oxidation-reduction process;	-	GO:0016491//oxidoreductase activity;	-
CsGy6G016230	54.2848	25.8978	82.6718	3.19224	1.67457	0.0397751	0.430727	Chr6	15296043	15297923	-	1881	-	GO:0000145;GO:0006887;	K07195	virNOG16311;virNOG01158	U	sp|Q8VY27|E70H1_ARATH Exocyst complex component EXO70H1 OS=Arabidopsis thaliana GN=EXO70H1 PE=1 SV=1	exocyst complex component EXO70B1-like	GO:0006887//exocytosis;	GO:0000145//exocyst;	-	ko05132(Salmonella infection);ko04910(Insulin signaling pathway)
CsGy7G014830	30.8191	19.7241	41.9141	2.12502	1.08748	0.0408197	0.435864	Chr7	18870594	18873217	+	2232	-	GO:0016042;GO:0016787;	-	virNOG04544	I	sp|Q93ZQ3|PLP9_ARATH Probable inactive patatin-like protein 9 OS=Arabidopsis thaliana GN=PLP9 PE=2 SV=1	Patatin	GO:0016042//lipid catabolic process;	-	GO:0016787//hydrolase activity;	-
CsGy1G020280	851.588	484.524	1218.65	2.51515	1.33065	0.0416574	0.442125	Chr1	19005999	19012579	+	3747	-	GO:0000166;GO:0005576;GO:0016021;GO:0019829;GO:0030001;GO:0046872;	K01534	virNOG02768;COG2217	P	sp|O64474|HMA4_ARATH Putative cadmium/zinc-transporting ATPase HMA4 OS=Arabidopsis thaliana GN=HMA4 PE=1 SV=2	Heavy metal ATPase 4	GO:0030001//metal ion transport;	GO:0005576//extracellular region;GO:0016021//integral component of membrane;	GO:0000166//nucleotide binding;GO:0019829//ATPase-coupled cation transmembrane transporter activity;GO:0046872//metal ion binding;	-
CsGy3G012140	205.957	127.557	284.356	2.22924	1.15655	0.0429974	0.449241	Chr3	9229061	9229747	-	687	-	GO:0003677;GO:0003700;GO:0005634;GO:0006355;	K14516	virNOG22753;virNOG19226	K	sp|Q8LDC8|ERF92_ARATH Ethylene-responsive transcription factor 1B OS=Arabidopsis thaliana GN=ERF1B PE=1 SV=2	Ethylene-responsive transcription factor 1B	GO:0006355//regulation of transcription, DNA-templated;	GO:0005634//nucleus;	GO:0003677//DNA binding;GO:0003700//DNA-binding transcription factor activity;	ko04075(Plant hormone signal transduction);ko04016(MAPK signaling pathway - plant)
CsGy7G008460	345.528	194.886	496.171	2.54596	1.34821	0.0438454	0.453136	Chr7	9500603	9501564	-	857	-	-	-	virNOG26307;virNOG24842;NOG176802	SR	sp|Q8W453|DIRL1_ARATH Putative lipid-transfer protein DIR1 OS=Arabidopsis thaliana GN=DIR1 PE=1 SV=1	putative lipid-transfer protein DIR1	-	-	-	-
CsGy3G043640	16.0876	8.08554	24.0897	2.97935	1.575	0.0454367	0.461228	Chr3	40512821	40513794	+	966	-	-	-	virNOG17557	S	sp|Q9FXA4|PUB26_ARATH U-box domain-containing protein 26 OS=Arabidopsis thaliana GN=PUB26 PE=2 SV=1	U-box domain-containing protein 26	-	-	-	-
CsGy2G016250	34.6949	21.9041	47.4858	2.1679	1.1163	0.0470058	0.463987	Chr2	16263975	16265237	-	1163	-	-	-	virNOG34651	S	-	enabled-like protein (DUF1635)	-	-	-	-
CsGy0G001210	15.4479	7.76264	23.1331	2.98005	1.57534	0.0478218	0.468307	Chr0	16430719	16432116	-	1012	-	GO:0016020;	-	virNOG27139	R	sp|A8MRP4|THNL2_ARATH Thionin-like protein 2 OS=Arabidopsis thaliana GN=At1g12663 PE=3 SV=1	thionin-like protein 2	-	GO:0016020//membrane;	-	-
CsGy6G003200	5.24853	0.28025	10.2168	36.456	5.18808	0.0480728	0.469006	Chr6	2639338	2640687	-	654	-	GO:0005737;GO:0016021;GO:0030001;GO:0046914;GO:0046916;	-	virNOG25069	S	sp|A0JPW5|HIP19_ARATH Heavy metal-associated isoprenylated plant protein 19 OS=Arabidopsis thaliana GN=HIPP19 PE=2 SV=1	Copper transport protein family	GO:0030001//metal ion transport;GO:0046916//cellular transition metal ion homeostasis;	GO:0005737//cytoplasm;GO:0016021//integral component of membrane;	GO:0046914//transition metal ion binding;	-
CsGy3G003640	3.63696	0.286944	6.98698	24.3496	4.60583	0.0480884	0.469006	Chr3	2970190	2975024	+	1248	-	GO:0000287;GO:0008152;GO:0010333;	K15803	virNOG05092;virNOG28426	R	sp|Q6Q3H3|TPSGD_VITVI (-)-germacrene D synthase OS=Vitis vinifera GN=VIT_19s0014g04930 PE=1 SV=1	(-)-germacrene D synthase-like	GO:0008152//metabolic process;	-	GO:0000287//magnesium ion binding;GO:0010333//terpene synthase activity;	ko00909(Sesquiterpenoid and triterpenoid biosynthesis)
CsGy6G014160	650.118	302.981	997.255	3.29148	1.71873	0.0483673	0.469898	Chr6	12524964	12526323	+	1251	-	GO:0016021;GO:0016874;GO:0030001;GO:0046873;GO:0055085;	K11982	NOG122401;virNOG00007;virNOG10608	O	sp|O22283|RHC2A_ARATH Probable E3 ubiquitin-protein ligase RHC2A OS=Arabidopsis thaliana GN=RHC2A PE=2 SV=1	E3 ubiquitin-protein ligase RING1	GO:0030001//metal ion transport;GO:0055085//transmembrane transport;	GO:0016021//integral component of membrane;	GO:0016874//ligase activity;GO:0046873//metal ion transmembrane transporter activity;	-
CsGy2G013670	33.6724	10.8747	56.4701	5.19282	2.37652	0.0488459	0.471969	Chr2	13334458	13334760	-	303	-	-	-	virNOG24937;virNOG34586	S	-	Unknown Protein	-	-	-	-
CsGy1G012790	6.55966	1.35611	11.7632	8.67426	3.11674	0.0489954	0.472498	Chr1	8206902	8208119	-	546	-	-	-	virNOG30575	R	sp|Q8LEE9|FLA12_ARATH Fasciclin-like arabinogalactan protein 12 OS=Arabidopsis thaliana GN=FLA12 PE=2 SV=2	Unknown Protein	-	-	-	-
CsGy5G006590	72.4473	25.9037	118.991	4.59359	2.19962	0.0493152	0.473976	Chr5	4473848	4476511	+	1387	-	-	K01054	virNOG02898	I	sp|Q9C942|CSE_ARATH Caffeoylshikimate esterase OS=Arabidopsis thaliana GN=CSE PE=1 SV=1	caffeoylshikimate esterase	-	-	-	ko04923(Regulation of lipolysis in adipocytes);ko04723(Retrograde endocannabinoid signaling);ko04714(Thermogenesis);ko00561(Glycerolipid metabolism)
CsGy5G016130	164.312	74.8767	253.746	3.38886	1.7608	0.0494878	0.475382	Chr5	22483998	22485098	+	1101	-	GO:0004222;GO:0006508;GO:0008270;GO:0031012;	-	virNOG08784	OW	sp|O04529|2MMP_ARATH Metalloendoproteinase 2-MMP OS=Arabidopsis thaliana GN=2MMP PE=1 SV=1	metalloendoproteinase 2-MMP	GO:0006508//proteolysis;	GO:0031012//extracellular matrix;	GO:0004222//metalloendopeptidase activity;GO:0008270//zinc ion binding;	-
CsGy5G025300	287.968	139.061	436.876	3.14163	1.65151	0.0495942	0.475648	Chr5	29621695	29622522	-	828	-	GO:0004751;GO:0009052;	K01807	virNOG12320	G	sp|Q9ZU38|RPI2_ARATH Probable ribose-5-phosphate isomerase 2 OS=Arabidopsis thaliana GN=RPI2 PE=1 SV=1	probable ribose-5-phosphate isomerase 2	GO:0009052//pentose-phosphate shunt, non-oxidative branch;	-	GO:0004751//ribose-5-phosphate isomerase activity;	ko00710(Carbon fixation in photosynthetic organisms);ko00030(Pentose phosphate pathway)
CsGy7G002100	129.416	234.763	24.0691	0.102525	-3.28595	1.53672e-20	1.39204e-16	Chr7	1753645	1764724	-	3608	-	GO:0000155;GO:0000160;GO:0005524;GO:0005622;GO:0023014;	-	virNOG07195	T	sp|P93025|PHOT2_ARATH Phototropin-2 OS=Arabidopsis thaliana GN=PHOT2 PE=1 SV=2	phototropin-2-like isoform X1	GO:0000160//phosphorelay signal transduction system;	GO:0005622//intracellular anatomical structure;	GO:0000155//phosphorelay sensor kinase activity;GO:0005524//ATP binding;	-
CsGy7G007870	128.982	229.55	28.4132	0.123778	-3.01417	1.97858e-18	7.16919e-15	Chr7	6045634	6048616	-	863	-	GO:0009941;GO:0016021;	K15115	virNOG13026	C	sp|Q7XA87|FOLT1_ARATH Folate transporter 1, chloroplastic OS=Arabidopsis thaliana GN=FOLT1 PE=2 SV=1	folate transporter 1, chloroplastic isoform X2	-	GO:0009941//chloroplast envelope;GO:0016021//integral component of membrane;	-	-
CsGy1G027850	1173.99	1817.09	530.894	0.292167	-1.77514	3.33455e-18	1.00687e-14	Chr1	26180719	26182801	+	1266	-	GO:0005576;GO:0030145;GO:0045735;	-	virNOG13595	R	sp|Q9ZRA4|AB19A_PRUPE Auxin-binding protein ABP19a OS=Prunus persica GN=ABP19A PE=3 SV=1	Germin protein subfamily 3 member 3	-	GO:0005576//extracellular region;	GO:0030145//manganese ion binding;GO:0045735//nutrient reservoir activity;	-
CsGy7G008150	421.28	713.109	129.452	0.181532	-2.46171	1.15613e-16	2.61821e-13	Chr7	8900164	8903518	+	1014	-	GO:0016021;GO:0030001;GO:0046873;GO:0055085;	K14709	virNOG01413	P	sp|Q94EG9|ZIP11_ARATH Zinc transporter 11 OS=Arabidopsis thaliana GN=ZIP11 PE=2 SV=1	zinc transporter 11	GO:0030001//metal ion transport;GO:0055085//transmembrane transport;	GO:0016021//integral component of membrane;	GO:0046873//metal ion transmembrane transporter activity;	ko05012(Parkinson disease);ko05010(Alzheimer disease)
CsGy5G025890	6892.31	10048.1	3736.47	0.371857	-1.42718	9.66034e-15	1.94463e-11	Chr5	29960330	29962585	+	884	-	GO:0005737;GO:0030001;GO:0046914;GO:0046916;	K07213	KOG1603;virNOG23233	P	sp|O82089|CCH_ARATH Copper transport protein CCH OS=Arabidopsis thaliana GN=CCH PE=1 SV=1	copper transport protein ATX1-like	GO:0030001//metal ion transport;GO:0046916//cellular transition metal ion homeostasis;	GO:0005737//cytoplasm;	GO:0046914//transition metal ion binding;	ko04978(Mineral absorption)
CsGy2G027220	245.007	395.847	94.1678	0.237889	-2.07164	2.87628e-14	5.21096e-11	Chr2	34772305	34773272	-	471	-	GO:0006952;GO:0009607;	-	virNOG19839	S	sp|Q4QTJ2|NCS1_PAPSO S-norcoclaurine synthase 1 OS=Papaver somniferum GN=NCS1 PE=1 SV=1	S-norcoclaurine synthase 1-like	GO:0006952//defense response;GO:0009607//response to biotic stimulus;	-	-	-
CsGy6G013930	1820.92	2695.58	946.274	0.351047	-1.51026	4.59601e-14	7.56963e-11	Chr6	12352669	12370337	+	6216	-	GO:0005737;GO:0005980;GO:0008184;GO:0030170;	K00688	virNOG01311	G	sp|P32811|PHSH_SOLTU Alpha-glucan phosphorylase, H isozyme OS=Solanum tuberosum PE=1 SV=1	alpha-glucan phosphorylase 2	GO:0005980//glycogen catabolic process;	GO:0005737//cytoplasm;	GO:0008184//glycogen phosphorylase activity;GO:0030170//pyridoxal phosphate binding;	ko04931(Insulin resistance);ko04922(Glucagon signaling pathway);ko04910(Insulin signaling pathway);ko04217(Necroptosis);ko02026(Biofilm formation - Escherichia coli);ko00500(Starch and sucrose metabolism)
CsGy5G006020	745.841	1274.02	217.666	0.17085	-2.5492	1.32016e-13	1.99311e-10	Chr5	4017046	4021304	+	3168	-	GO:0009507;GO:0016021;	-	virNOG00690	O	sp|Q9FMX6|DJC76_ARATH Chaperone protein dnaJ C76, chloroplastic OS=Arabidopsis thaliana GN=DJC76 PE=2 SV=1	Chaperone protein DnaJ	-	GO:0009507//chloroplast;GO:0016021//integral component of membrane;	-	-
CsGy1G006980	2931.77	4263.85	1599.68	0.375174	-1.41437	1.84762e-13	2.57487e-10	Chr1	4468591	4470239	+	1311	-	GO:0000413;GO:0003755;	-	virNOG03158	O	sp|Q9LDY5|FK172_ARATH Peptidyl-prolyl cis-trans isomerase FKBP17-2, chloroplastic OS=Arabidopsis thaliana GN=FKBP17-2 PE=1 SV=1	Peptidylprolyl isomerase	GO:0000413//protein peptidyl-prolyl isomerization;	-	GO:0003755//peptidyl-prolyl cis-trans isomerase activity;	-
CsGy4G024980	273.592	436.153	111.03	0.254568	-1.97388	6.78755e-13	8.78358e-10	Chr4	30540002	30541607	-	975	-	GO:0003677;GO:0005634;GO:0010197;	-	virNOG15405	K	sp|Q9SGS2|HMGB9_ARATH High mobility group B protein 9 OS=Arabidopsis thaliana GN=HMGB9 PE=1 SV=1	high mobility group B protein 9	GO:0010197//polar nucleus fusion;	GO:0005634//nucleus;	GO:0003677//DNA binding;	-
CsGy1G024600	817.78	1215.53	420.027	0.34555	-1.53303	8.30918e-13	1.00358e-09	Chr1	23474675	23478156	-	1012	-	GO:0016614;GO:0050660;GO:0055114;	-	virNOG39050;virNOG39462;virNOG13063;virNOG39040	R	sp|Q9FI21|BBE28_ARATH Berberine bridge enzyme-like 28 OS=Arabidopsis thaliana GN=At5g44440 PE=1 SV=1	Berberine bridge enzyme-like 24	GO:0055114//obsolete oxidation-reduction process;	-	GO:0016614//oxidoreductase activity, acting on CH-OH group of donors;GO:0050660//flavin adenine dinucleotide binding;	-
CsGy5G005210	595.469	882.743	308.195	0.349134	-1.51815	3.49519e-12	3.95764e-09	Chr5	3343579	3349332	+	2850	-	GO:0004672;GO:0005524;GO:0006468;GO:0016021;	-	virNOG14925;virNOG31306;NOG122780	ST	sp|Q8VZG8|MIK2_ARATH MDIS1-interacting receptor like kinase 2 OS=Arabidopsis thaliana GN=MIK2 PE=1 SV=3	Receptor protein kinase, putative	GO:0006468//protein phosphorylation;	GO:0016021//integral component of membrane;	GO:0004672//protein kinase activity;GO:0005524//ATP binding;	-
CsGy5G011220	99.8316	168.52	31.1434	0.184806	-2.43592	2.27009e-11	2.41925e-08	Chr5	11984474	11985145	-	462	-	GO:0006952;GO:0009607;	-	virNOG23041;virNOG28110	SR	sp|Q9ZVF3|ML328_ARATH MLP-like protein 328 OS=Arabidopsis thaliana GN=MLP328 PE=2 SV=1	MLP-like protein 328	GO:0006952//defense response;GO:0009607//response to biotic stimulus;	-	-	-
CsGy6G017090	81.9045	142.492	21.3165	0.149598	-2.74084	2.42175e-11	2.43749e-08	Chr6	17617526	17620290	+	1314	-	GO:0007076;GO:1903046;	K11491	virNOG06119	S	sp|Q6ZQK0|CNDD3_MOUSE Condensin-2 complex subunit D3 OS=Mus musculus GN=Ncapd3 PE=1 SV=3	condensin-2 complex subunit D3	GO:0007076//mitotic chromosome condensation;GO:1903046//meiotic cell cycle process;	-	-	-
CsGy3G002010	2468.94	3446.51	1491.37	0.432718	-1.2085	1.19911e-10	1.08621e-07	Chr3	1586807	1589655	+	2175	-	GO:0000272;GO:0016161;	K01177	virNOG12517	G	sp|O23553|BAM3_ARATH Beta-amylase 3, chloroplastic OS=Arabidopsis thaliana GN=BAM3 PE=1 SV=3	Beta-amylase	GO:0000272//polysaccharide catabolic process;	-	GO:0016161//beta-amylase activity;	ko00500(Starch and sucrose metabolism)
CsGy7G003630	716.511	1028.15	404.871	0.393785	-1.34452	1.69106e-10	1.44806e-07	Chr7	2797740	2803413	+	4616	-	GO:0000272;GO:0016161;	-	virNOG01819	R	sp|P10538|AMYB_SOYBN Beta-amylase OS=Glycine max GN=BMY1 PE=1 SV=3	Beta-amylase	GO:0000272//polysaccharide catabolic process;	-	GO:0016161//beta-amylase activity;	-
CsGy5G024620	607.753	878.927	336.579	0.382943	-1.3848	1.83835e-10	1.44806e-07	Chr5	29198332	29200128	-	1113	-	GO:0030001;GO:0046872;	-	virNOG25875;virNOG24319	S	-	hypothetical protein	GO:0030001//metal ion transport;	-	GO:0046872//metal ion binding;	-
CsGy6G008470	54.1493	95.6525	12.6461	0.132209	-2.91911	1.15151e-09	6.95396e-07	Chr6	7063374	7064633	-	1008	-	-	-	-	-	-	Uncharacterized protein	-	-	-	-
CsGy6G021980	1046.22	1639.09	453.349	0.276586	-1.8542	2.19823e-09	1.24454e-06	Chr6	22551668	22554645	+	1680	-	-	-	virNOG19452	O	sp|Q4UKR8|HSPC2_RICFE Small heat shock protein C2 OS=Rickettsia felis (strain ATCC VR-1525 / URRWXCal2) GN=hspC2 PE=3 SV=1	HSP27.8	-	-	-	-
CsGy5G021940	2431.98	3361.18	1502.78	0.447098	-1.16134	3.7877e-09	1.96062e-06	Chr5	27555824	27571925	-	6580	-	GO:0005524;GO:0016301;GO:0016310;	K08244	virNOG08675	R	sp|Q8LPT9|GWD1_CITRE Alpha-glucan water dikinase, chloroplastic OS=Citrus reticulata GN=R1 PE=2 SV=1	Alpha-glucan water dikinase, chloroplastic	GO:0016310//phosphorylation;	-	GO:0005524//ATP binding;GO:0016301//kinase activity;	-
CsGy2G019290	626.329	990.868	261.789	0.264202	-1.92029	4.23357e-09	2.13054e-06	Chr2	28712337	28717371	-	1637	-	GO:0016042;GO:0016787;	-	virNOG08833	I	sp|O48723|PLP2_ARATH Patatin-like protein 2 OS=Arabidopsis thaliana GN=PLP2 PE=1 SV=1	Patatin	GO:0016042//lipid catabolic process;	-	GO:0016787//hydrolase activity;	-
CsGy4G001080	1495.86	2407.27	584.453	0.242787	-2.04224	1.48223e-08	6.88552e-06	Chr4	665684	668197	-	1745	-	GO:0005773;GO:0006950;GO:0016787;	-	virNOG21374	S	sp|Q8VYN9|PHO32_ARATH Universal stress protein PHOS32 OS=Arabidopsis thaliana GN=PHOS32 PE=1 SV=1	universal stress protein A-like protein	GO:0006950//response to stress;	GO:0005773//vacuole;	GO:0016787//hydrolase activity;	-
CsGy6G006070	4255.11	6238.56	2271.66	0.364132	-1.45747	1.94764e-08	8.82134e-06	Chr6	5357461	5361815	+	2659	-	GO:0009651;GO:0009737;	-	virNOG12302	S	-	Nuclear factor 1 A-type isoform 2	GO:0009651//response to salt stress;GO:0009737//response to abscisic acid;	-	-	-
CsGy1G010890	276.282	405.334	147.23	0.36323	-1.46104	2.48674e-08	1.09883e-05	Chr1	6853704	6859085	+	2283	-	GO:0005524;GO:0016301;GO:0016310;	K20115	virNOG04050	R	sp|O49562|PDRP1_ARATH Pyruvate, phosphate dikinase regulatory protein 1, chloroplastic OS=Arabidopsis thaliana GN=RP1 PE=1 SV=1	Putative pyruvate, phosphate dikinase regulatory protein	GO:0016310//phosphorylation;	-	GO:0005524//ATP binding;GO:0016301//kinase activity;	-
CsGy1G002140	217.264	326.566	107.961	0.330596	-1.59686	3.33981e-08	1.42262e-05	Chr1	1364727	1366551	+	915	-	-	-	virNOG01329	O	sp|Q6L4S3|HIRL1_ORYSJ Hypersensitive-induced response protein-like protein 1 OS=Oryza sativa subsp. japonica GN=HIRL1 PE=2 SV=1	Hypersensitive-induced response protein-like protein 1	-	-	-	-
CsGy4G010830	934.072	1280.17	587.976	0.459296	-1.1225	4.42403e-08	1.82159e-05	Chr4	9998654	10001833	+	1125	-	GO:0003824;GO:0005975;GO:0030246;	-	virNOG03778	S	sp|Q9C503|NDF5_ARATH Protein NDH-DEPENDENT CYCLIC ELECTRON FLOW 5 OS=Arabidopsis thaliana GN=NDF5 PE=2 SV=1	protein NDH-DEPENDENT CYCLIC ELECTRON FLOW 5	GO:0005975//carbohydrate metabolic process;	-	GO:0003824//catalytic activity;GO:0030246//carbohydrate binding;	-
CsGy2G000740	1883.62	2532.63	1234.61	0.487479	-1.03659	4.54388e-08	1.82937e-05	Chr2	466693	467946	+	1137	-	-	-	virNOG22155;virNOG24891	K	-	oxidative stress 3	-	-	-	-
CsGy1G016600	3299.59	4432.5	2166.68	0.488816	-1.03264	5.20148e-08	2.04859e-05	Chr1	13873308	13877732	+	2426	-	GO:0009536;GO:0010304;GO:0015996;GO:0016021;GO:0047936;GO:0055114;	K13606	virNOG07454	Q	sp|Q5N800|NYC1_ORYSJ Probable chlorophyll(ide) b reductase NYC1, chloroplastic OS=Oryza sativa subsp. japonica GN=NYC1 PE=1 SV=1	probable chlorophyll(Ide) b reductase NYC1, chloroplastic	GO:0010304//PSII associated light-harvesting complex II catabolic process;GO:0015996//chlorophyll catabolic process;GO:0055114//obsolete oxidation-reduction process;	GO:0009536//plastid;GO:0016021//integral component of membrane;	GO:0047936//glucose 1-dehydrogenase [NAD(P)] activity;	ko00860(Porphyrin metabolism)
CsGy3G009680	150.004	240.847	59.1605	0.245635	-2.02541	1.06877e-07	3.79666e-05	Chr3	7763673	7764938	-	1153	-	-	-	virNOG20967;virNOG11946	S	-	hypothetical protein (DUF1442)	-	-	-	-
CsGy5G021650	476.161	681.441	270.881	0.397512	-1.33093	1.63032e-07	5.57294e-05	Chr5	27335552	27340662	+	1839	-	GO:0016021;	-	virNOG04842	S	-	lysine ketoglutarate reductase trans-splicing protein (DUF707)	-	GO:0016021//integral component of membrane;	-	-
CsGy6G009430	898.349	1510.44	286.261	0.189522	-2.39956	1.81595e-07	5.87491e-05	Chr6	7898915	7905983	-	2681	-	GO:0005634;GO:0008270;GO:0016021;	-	virNOG09433	R	sp|Q9LUA9|COL10_ARATH Zinc finger protein CONSTANS-LIKE 10 OS=Arabidopsis thaliana GN=COL10 PE=1 SV=1	zinc finger protein CONSTANS-LIKE 9-like isoform X1	-	GO:0005634//nucleus;GO:0016021//integral component of membrane;	GO:0008270//zinc ion binding;	-
CsGy6G017080	186.595	275.627	97.5629	0.353967	-1.49831	1.95246e-07	6.09874e-05	Chr6	17608923	17611871	+	1110	-	GO:0005739;GO:0016651;GO:0048038;GO:0051287;GO:0055114;	K03935	virNOG11067;COG0649	C	sp|Q36450|NDUS2_NICSY NADH dehydrogenase [ubiquinone] iron-sulfur protein 2 OS=Nicotiana sylvestris GN=NAD7 PE=2 SV=1	NADH-quinone oxidoreductase subunit D	GO:0055114//obsolete oxidation-reduction process;	GO:0005739//mitochondrion;	GO:0016651//oxidoreductase activity, acting on NAD(P)H;GO:0048038//quinone binding;GO:0051287//NAD binding;	ko05415(Diabetic cardiomyopathy);ko05208(Chemical carcinogenesis - reactive oxygen species);ko05022(Pathways of neurodegeneration - multiple diseases);ko05020(Prion disease);ko05016(Huntington disease);ko05014(Amyotrophic lateral sclerosis);ko05012(Parkinson disease);ko05010(Alzheimer disease);ko04932(Non-alcoholic fatty liver disease);ko04723(Retrograde endocannabinoid signaling);ko04714(Thermog…
CsGy2G025360	1062.25	1430.44	694.056	0.485206	-1.04333	2.08404e-07	6.30794e-05	Chr2	32814073	32819070	-	3444	-	GO:0004672;GO:0005524;GO:0006468;GO:0016021;	-	virNOG03568	T	sp|Q8LFN2|Y3037_ARATH Probable inactive leucine-rich repeat receptor-like protein kinase At3g03770 OS=Arabidopsis thaliana GN=At3g03770 PE=2 SV=1	Leucine-rich repeat protein kinase family protein	GO:0006468//protein phosphorylation;	GO:0016021//integral component of membrane;	GO:0004672//protein kinase activity;GO:0005524//ATP binding;	-
CsGy3G019660	2168.21	3029.18	1307.25	0.43155	-1.2124	2.23461e-07	6.60268e-05	Chr3	15827037	15833873	-	3833	-	GO:0005655;	-	virNOG14054	S	-	Ribonuclease P protein subunit P38-like protein	-	GO:0005655//nucleolar ribonuclease P complex;	-	-
CsGy1G021310	385.784	538.674	232.895	0.432349	-1.20973	2.5985e-07	7.45986e-05	Chr1	20049620	20055357	+	2163	-	GO:0003677;GO:0005634;GO:0006281;GO:0035312;GO:0090305;	K10746	virNOG00834	L	sp|Q8L6Z7|EXO1_ARATH Exonuclease 1 OS=Arabidopsis thaliana GN=EXO1 PE=2 SV=2	exonuclease 1	GO:0006281//DNA repair;GO:0090305//nucleic acid phosphodiester bond hydrolysis;	GO:0005634//nucleus;	GO:0003677//DNA binding;GO:0035312//5'-3' exodeoxyribonuclease activity;	ko03430(Mismatch repair)
CsGy5G011210	50.5288	85.3659	15.6917	0.183817	-2.44366	3.37867e-07	9.00167e-05	Chr5	11976850	11977502	-	462	-	GO:0006952;GO:0009607;	-	virNOG23041;virNOG28110	SR	sp|Q9ZVF3|ML328_ARATH MLP-like protein 328 OS=Arabidopsis thaliana GN=MLP328 PE=2 SV=1	MLP-like protein 328	GO:0006952//defense response;GO:0009607//response to biotic stimulus;	-	-	-
CsGy3G027370	768.013	1048.69	487.34	0.464714	-1.10558	3.49882e-07	9.18669e-05	Chr3	28467219	28470705	-	1565	-	GO:0016021;	-	virNOG13397	S	-	Uncharacterized protein family (UPF0114)	-	GO:0016021//integral component of membrane;	-	-
CsGy3G019510	682.159	922.501	441.816	0.478933	-1.0621	4.1719e-07	0.000106454	Chr3	15729694	15734450	-	3165	-	GO:0016021;GO:0055085;	-	virNOG12909	P	sp|Q2EF88|YSL3_ARATH Metal-nicotianamine transporter YSL3 OS=Arabidopsis thaliana GN=YSL3 PE=2 SV=1	metal-nicotianamine transporter YSL3	GO:0055085//transmembrane transport;	GO:0016021//integral component of membrane;	-	-
CsGy6G000640	483.731	668.003	299.459	0.44829	-1.15749	4.55403e-07	0.000114591	Chr6	438669	443143	+	1964	-	GO:0009570;	-	virNOG12814	S	-	ribosomal RNA small subunit methyltransferase G	-	GO:0009570//chloroplast stroma;	-	-
CsGy6G017910	82.7496	143.389	22.1103	0.154198	-2.69714	4.64422e-07	0.000115259	Chr6	18738726	18743439	+	2711	-	GO:0004672;GO:0005509;GO:0005524;GO:0006468;GO:0016021;GO:0030247;	-	virNOG01267;NOG128933	T	sp|Q9LMP1|WAK2_ARATH Wall-associated receptor kinase 2 OS=Arabidopsis thaliana GN=WAK2 PE=1 SV=1	wall-associated receptor kinase 2-like	GO:0006468//protein phosphorylation;	GO:0016021//integral component of membrane;	GO:0004672//protein kinase activity;GO:0005509//calcium ion binding;GO:0005524//ATP binding;GO:0030247//polysaccharide binding;	-
CsGy1G005540	1357.78	1945.07	770.49	0.396125	-1.33597	5.2614e-07	0.000125422	Chr1	3626877	3634144	+	3929	-	GO:0000160;GO:0003677;GO:0003700;GO:0005634;GO:0006355;GO:0007623;GO:0010031;GO:0010629;GO:0016301;GO:0016310;	K12127	virNOG00994	K	sp|Q9LKL2|APRR1_ARATH Two-component response regulator-like APRR1 OS=Arabidopsis thaliana GN=APRR1 PE=1 SV=1	two-component response regulator-like APRR1	GO:0000160//phosphorelay signal transduction system;GO:0006355//regulation of transcription, DNA-templated;GO:0007623//circadian rhythm;GO:0010031//circumnutation;GO:0010629//negative regulation of gene expression;GO:0016310//phosphorylation;	GO:0005634//nucleus;	GO:0003677//DNA binding;GO:0003700//DNA-binding transcription factor activity;GO:0016301//kinase activity;	ko04712(Circadian rhythm - plant)
CsGy3G012440	1007.9	1346.54	669.256	0.497019	-1.00863	8.30745e-07	0.00018581	Chr3	9377124	9382563	-	2554	-	GO:0016021;GO:0016760;GO:0030244;GO:0071555;	-	virNOG00274	S	sp|Q651X7|CSLE1_ORYSJ Cellulose synthase-like protein E1 OS=Oryza sativa subsp. japonica GN=CSLE1 PE=2 SV=2	cellulose synthase-like protein G2 isoform X2	GO:0030244//cellulose biosynthetic process;GO:0071555//cell wall organization;	GO:0016021//integral component of membrane;	GO:0016760//cellulose synthase (UDP-forming) activity;	-
CsGy1G023210	4212.3	7182.84	1241.76	0.172879	-2.53216	8.83298e-07	0.000195155	Chr1	22088862	22093986	+	2290	-	GO:0005524;GO:0009228;GO:0016830;GO:0051536;	K03147	virNOG07001	H	sp|O82392|THIC_ARATH Phosphomethylpyrimidine synthase, chloroplastic OS=Arabidopsis thaliana GN=THIC PE=1 SV=1	Phosphomethylpyrimidine synthase	GO:0009228//thiamine biosynthetic process;	-	GO:0005524//ATP binding;GO:0016830//carbon-carbon lyase activity;GO:0051536//iron-sulfur cluster binding;	ko00730(Thiamine metabolism)
CsGy2G024240	148.001	218.016	77.9856	0.357706	-1.48315	9.44414e-07	0.00020369	Chr2	32018378	32020910	-	1809	-	GO:0003677;GO:0005524;GO:0016787;	K10896	virNOG09452;virNOG40601	AR	sp|I3XHK1|FANCM_ARATH DEAD-box ATP-dependent RNA helicase FANCM OS=Arabidopsis thaliana GN=FANCM PE=2 SV=1	Fanconi anemia group M protein isoform X1	-	-	GO:0003677//DNA binding;GO:0005524//ATP binding;GO:0016787//hydrolase activity;	ko03460(Fanconi anemia pathway)
CsGy3G015640	58.7884	96.4154	21.1614	0.219481	-2.18783	1.21464e-06	0.000254546	Chr3	11548056	11549009	+	841	-	GO:0006952;GO:0009607;	-	virNOG24009;euNOG20118;virNOG21720	S	sp|Q9SSK5|MLP43_ARATH MLP-like protein 43 OS=Arabidopsis thaliana GN=MLP43 PE=1 SV=1	MLP-like protein 43	GO:0006952//defense response;GO:0009607//response to biotic stimulus;	-	-	-
CsGy5G026200	173.964	254.616	93.3126	0.366483	-1.44818	1.30211e-06	0.000268073	Chr5	30231573	30246454	-	4885	-	GO:0005983;GO:0009570;GO:0010303;GO:0019252;GO:0051060;	-	virNOG01883	G	sp|Q8GTR4|PULA1_ARATH Pullulanase 1, chloroplastic OS=Arabidopsis thaliana GN=PU1 PE=1 SV=2	pullulanase 1, chloroplastic	GO:0005983//starch catabolic process;GO:0019252//starch biosynthetic process;	GO:0009570//chloroplast stroma;	GO:0010303//limit dextrinase activity;GO:0051060//pullulanase activity;	-
CsGy7G020020	261.236	367.029	155.444	0.423518	-1.2395	1.58608e-06	0.00031577	Chr7	22520416	22524148	+	1715	-	GO:0005743;GO:0006839;GO:0016021;GO:0022857;GO:0055085;	K14684	virNOG02737	C	sp|Q9LJX5|BRTL1_ARATH Probable mitochondrial adenine nucleotide transporter BTL1 OS=Arabidopsis thaliana GN=At3g20240 PE=2 SV=1	Mitochondrial carrier protein	GO:0006839//mitochondrial transport;GO:0055085//transmembrane transport;	GO:0005743//mitochondrial inner membrane;GO:0016021//integral component of membrane;	GO:0022857//transmembrane transporter activity;	-
CsGy6G000950	923.6	1428.8	418.395	0.292828	-1.77187	1.80424e-06	0.000346994	Chr6	662774	667942	-	4141	-	GO:0051087;	-	virNOG08654	T	sp|O82345|BAG6_ARATH BAG family molecular chaperone regulator 6 OS=Arabidopsis thaliana GN=BAG6 PE=1 SV=1	BAG family molecular chaperone regulator 6	-	-	GO:0051087//chaperone binding;	-
CsGy1G023130	400.972	637.336	164.607	0.258274	-1.95303	1.83869e-06	0.000346994	Chr1	22030786	22033226	-	1330	-	-	-	virNOG17918	S	-	Maternal effect embryo arrest 59	-	-	-	-
CsGy3G041650	60.7081	98.3303	23.0858	0.234778	-2.09063	2.13851e-06	0.00039534	Chr3	38876018	38877313	+	1178	-	-	-	virNOG25734	S	-	histone deacetylase-like protein	-	-	-	-
CsGy4G020440	93.49	143.501	43.4794	0.302991	-1.72265	2.17691e-06	0.000396573	Chr4	27335720	27338228	-	2415	-	GO:0008152;GO:0043231;GO:0080043;GO:0080044;	-	virNOG04097	CG	sp|Q9LHJ2|U82A1_ARATH UDP-glycosyltransferase 82A1 OS=Arabidopsis thaliana GN=UGT82A1 PE=2 SV=1	Glycosyltransferase	GO:0008152//metabolic process;	GO:0043231//intracellular membrane-bounded organelle;	GO:0080043//quercetin 3-O-glucosyltransferase activity;GO:0080044//quercetin 7-O-glucosyltransferase activity;	-
CsGy6G007640	181.419	276.974	85.8641	0.310008	-1.68962	2.18895e-06	0.000396573	Chr6	6429123	6432763	+	501	-	GO:0009733;	K14488	virNOG21462	S	sp|Q9SGU2|SAU71_ARATH Auxin-responsive protein SAUR71 OS=Arabidopsis thaliana GN=SAUR71 PE=2 SV=1	auxin-responsive protein SAUR36	GO:0009733//response to auxin;	-	-	ko04075(Plant hormone signal transduction)
CsGy3G029570	4774.68	7491.19	2058.16	0.274743	-1.86384	2.31007e-06	0.000414371	Chr3	30002995	30004626	+	1206	-	-	-	virNOG19040	R	-	PAR1 protein	-	-	-	-
CsGy5G004290	1134.76	1617	652.519	0.403536	-1.30923	2.56262e-06	0.000450748	Chr5	2858824	2862684	+	1725	-	GO:0016491;GO:0055114;	-	virNOG06021	QG	sp|B5F3F4|IOLG_SALA4 Inositol 2-dehydrogenase OS=Salmonella agona (strain SL483) GN=iolG PE=3 SV=1	inositol 2-dehydrogenase 2	GO:0055114//obsolete oxidation-reduction process;	-	GO:0016491//oxidoreductase activity;	-
CsGy1G023700	247.968	345.773	150.163	0.434283	-1.20329	2.71781e-06	0.000473447	Chr1	22469462	22473173	-	2776	-	GO:0015299;GO:0016021;GO:1902600;	-	virNOG15719	P	sp|Q1HDT2|CHX24_ARATH Cation/H(+) antiporter 24 OS=Arabidopsis thaliana GN=CHX24 PE=2 SV=2	cation/H(+) antiporter 24	GO:1902600//proton transmembrane transport;	GO:0016021//integral component of membrane;	GO:0015299//solute:proton antiporter activity;	-
CsGy5G016770	159.1	232.13	86.0705	0.370786	-1.43134	2.97932e-06	0.00051406	Chr5	23149891	23153040	-	2061	-	GO:0004177;GO:0006508;GO:0008237;GO:0008270;	K01254	virNOG05471	OIEV	sp|Q9FY49|LKHA4_ARATH Leukotriene A-4 hydrolase homolog OS=Arabidopsis thaliana GN=LKHA4 PE=2 SV=1	leukotriene A-4 hydrolase homolog	GO:0006508//proteolysis;	-	GO:0004177//aminopeptidase activity;GO:0008237//metallopeptidase activity;GO:0008270//zinc ion binding;	ko00590(Arachidonic acid metabolism)
CsGy5G017940	64.7597	104.508	25.0118	0.23933	-2.06293	3.26624e-06	0.000558249	Chr5	24147304	24150700	-	906	-	-	-	virNOG01125	O	sp|Q9FMX6|DJC76_ARATH Chaperone protein dnaJ C76, chloroplastic OS=Arabidopsis thaliana GN=DJC76 PE=2 SV=1	Chaperone protein dnaJ	-	-	-	-
CsGy3G016890	20.822	38.9936	2.65043	0.0679708	-3.87894	3.56807e-06	0.000598544	Chr3	12984065	12985663	-	830	-	-	-	virNOG25779	S	-	Uncharacterized protein	-	-	-	-
CsGy3G017350	439.896	675.434	204.358	0.302557	-1.72472	4.31242e-06	0.000703857	Chr3	13325720	13330205	-	1768	-	GO:0003677;GO:0005634;GO:0006355;GO:0009651;GO:0009723;GO:0009737;GO:0009739;GO:0009751;GO:0009753;GO:0042752;GO:0046686;	-	virNOG06677	K	sp|Q8H0W3|RVE6_ARATH Protein REVEILLE 6 OS=Arabidopsis thaliana GN=RVE6 PE=2 SV=1	protein REVEILLE 6-like isoform X2	GO:0006355//regulation of transcription, DNA-templated;GO:0009651//response to salt stress;GO:0009723//response to ethylene;GO:0009737//response to abscisic acid;GO:0009739//response to gibberellin;GO:0009751//response to salicylic acid;GO:0009753//response to jasmonic acid;GO:0042752//regulation of circadian rhythm;GO:0046686//response to cadmium ion;	GO:0005634//nucleus;	GO:0003677//DNA binding;	-
CsGy1G029100	961.386	1456.92	465.848	0.319747	-1.645	4.53679e-06	0.000733867	Chr1	27130119	27137305	-	2371	-	GO:0005507;GO:0005576;GO:0008447;GO:0055114;	K00423	virNOG02241	Q	sp|P14133|ASO_CUCSA L-ascorbate oxidase OS=Cucumis sativus PE=1 SV=1	L-ascorbate oxidase	GO:0055114//obsolete oxidation-reduction process;	GO:0005576//extracellular region;	GO:0005507//copper ion binding;GO:0008447//L-ascorbate oxidase activity;	ko00053(Ascorbate and aldarate metabolism)
CsGy3G013320	185.985	296.571	75.3987	0.254234	-1.97577	5.06664e-06	0.000805195	Chr3	9951678	9955944	+	2041	-	-	-	virNOG05403	I	sp|Q9UU99|YJX4_SCHPO CRAL-TRIO domain-containing protein C23B6.04c OS=Schizosaccharomyces pombe (strain 972 / ATCC 24843) GN=SPCC23B6.04c PE=1 SV=1	Sec14p-like phosphatidylinositol transfer family protein	-	-	-	-
CsGy7G002610	41.5422	69.6726	13.4117	0.192496	-2.3771	5.44133e-06	0.000857222	Chr7	2094961	2101416	+	1074	-	GO:0005524;	K10706	virNOG00915	A	sp|B6SFA4|MAA3_ARATH Probable helicase MAGATAMA 3 OS=Arabidopsis thaliana GN=MAA3 PE=2 SV=1	RNA helicase	-	-	GO:0005524//ATP binding;	ko05014(Amyotrophic lateral sclerosis)
CsGy5G015280	242.734	339.759	145.709	0.428862	-1.22142	5.64427e-06	0.000881528	Chr5	21284642	21290395	+	1951	-	-	-	virNOG03679	S	-	Transglut_core2 domain-containing protein	-	-	-	-
CsGy3G017250	300.467	412.085	188.849	0.458278	-1.12571	6.18126e-06	0.000957144	Chr3	13255292	13259480	-	2131	-	GO:0016021;GO:0016491;GO:0055114;	-	virNOG01268	QP	sp|Q8W110|FRO4_ARATH Ferric reduction oxidase 4 OS=Arabidopsis thaliana GN=FRO4 PE=2 SV=1	ferric reduction oxidase 4-like	GO:0055114//obsolete oxidation-reduction process;	GO:0016021//integral component of membrane;	GO:0016491//oxidoreductase activity;	-
CsGy2G018070	1204.27	1625.07	783.479	0.482121	-1.05253	6.9368e-06	0.00106503	Chr2	27876205	27881683	-	3339	-	-	K12125	virNOG04967	S	sp|O82804|ELF3_ARATH Protein EARLY FLOWERING 3 OS=Arabidopsis thaliana GN=ELF3 PE=1 SV=1	protein EARLY FLOWERING 3	-	-	-	ko04712(Circadian rhythm - plant)
CsGy1G029430	509.78	754.479	265.081	0.351342	-1.50905	7.80971e-06	0.00118898	Chr1	27541239	27541851	+	408	-	GO:0004553;GO:0005975;	K01188	virNOG09822;virNOG28780;COG2723	G	sp|Q9SPP9|RG1_RAUSE Raucaffricine-O-beta-D-glucosidase OS=Rauvolfia serpentina GN=RG PE=1 SV=1	beta-glucosidase 12	GO:0005975//carbohydrate metabolic process;	-	GO:0004553//hydrolase activity, hydrolyzing O-glycosyl compounds;	ko00940(Phenylpropanoid biosynthesis);ko00500(Starch and sucrose metabolism);ko00460(Cyanoamino acid metabolism)
CsGy1G020510	94.0794	143.226	44.9327	0.313718	-1.67246	8.10929e-06	0.0012243	Chr1	19205780	19210048	-	1756	-	-	-	virNOG11158	R	sp|O64566|PIRL6_ARATH Plant intracellular Ras-group-related LRR protein 6 OS=Arabidopsis thaliana GN=PIRL6 PE=2 SV=1	Leucine rich repeat protein	-	-	-	-
CsGy7G000250	167.335	238.231	96.4383	0.40481	-1.30468	8.73017e-06	0.00130715	Chr7	336180	337520	+	1201	-	GO:0005622;GO:0008270;GO:0016020;	-	virNOG14851;virNOG20418;virNOG15953	SK	sp|Q0IGM7|BBX20_ARATH B-box zinc finger protein 20 OS=Arabidopsis thaliana GN=BBX20 PE=1 SV=1	B-box zinc finger protein 20-like isoform X1	-	GO:0005622//intracellular anatomical structure;GO:0016020//membrane;	GO:0008270//zinc ion binding;	-
CsGy5G009340	36.1656	64.566	7.7653	0.120269	-3.05566	9.70377e-06	0.00142929	Chr5	7887184	7888181	+	780	-	GO:0006952;GO:0009607;	-	euNOG20118;virNOG21720	S	sp|Q9SSK5|MLP43_ARATH MLP-like protein 43 OS=Arabidopsis thaliana GN=MLP43 PE=1 SV=1	MLP-like protein 43	GO:0006952//defense response;GO:0009607//response to biotic stimulus;	-	-	-
CsGy1G032470	543.893	908.517	179.269	0.19732	-2.34139	1.00634e-05	0.00147031	Chr1	32092884	32102703	-	1553	-	GO:0003824;GO:0009116;GO:0016021;	-	virNOG01737	R	sp|Q07469|BSPA_POPDE Bark storage protein A OS=Populus deltoides GN=BSPA PE=2 SV=1	bark storage protein A	GO:0009116//nucleoside metabolic process;	GO:0016021//integral component of membrane;	GO:0003824//catalytic activity;	-
CsGy2G014270	680.185	964.194	396.176	0.410888	-1.28318	1.16926e-05	0.00166799	Chr2	14534582	14541267	-	2209	-	GO:0004674;GO:0005524;GO:0006468;	K14498	virNOG10052;virNOG29072	T	sp|Q39193|SRK2I_ARATH Serine/threonine-protein kinase SRK2I OS=Arabidopsis thaliana GN=SRK2I PE=1 SV=1	serine/threonine-protein kinase SRK2I	GO:0006468//protein phosphorylation;	-	GO:0004674//protein serine/threonine kinase activity;GO:0005524//ATP binding;	ko04075(Plant hormone signal transduction);ko04016(MAPK signaling pathway - plant)
CsGy1G029370	326.908	438.623	215.193	0.49061	-1.02735	1.40556e-05	0.00192319	Chr1	27458463	27470878	+	1421	-	GO:0004553;GO:0005975;	K01188	virNOG17139;virNOG09822;COG2723	G	sp|B8AVF0|BGL12_ORYSI Beta-glucosidase 12 OS=Oryza sativa subsp. indica GN=BGLU12 PE=3 SV=1	beta-glucosidase 12-like	GO:0005975//carbohydrate metabolic process;	-	GO:0004553//hydrolase activity, hydrolyzing O-glycosyl compounds;	ko00940(Phenylpropanoid biosynthesis);ko00500(Starch and sucrose metabolism);ko00460(Cyanoamino acid metabolism)
CsGy7G005410	150.957	213.529	88.3843	0.413921	-1.27257	2.25801e-05	0.00300796	Chr7	3973892	3986017	+	1020	-	GO:0010181;GO:0016491;GO:0055114;	K05894	virNOG00484	C	sp|B9FSC8|OPR11_ORYSJ Putative 12-oxophytodienoate reductase 11 OS=Oryza sativa subsp. japonica GN=OPR11 PE=2 SV=1	putative 12-oxophytodienoate reductase 11	GO:0055114//obsolete oxidation-reduction process;	-	GO:0010181//FMN binding;GO:0016491//oxidoreductase activity;	ko00592(alpha-Linolenic acid metabolism)
CsGy7G006960	2022.68	2872.51	1172.86	0.408303	-1.29229	2.2846e-05	0.00301895	Chr7	5069624	5072022	+	2225	-	-	-	virNOG06010;COG4886;virNOG04219	SR	sp|Q8W3M4|Y4744_ARATH Uncharacterized protein At4g06744 OS=Arabidopsis thaliana GN=At4g06744 PE=2 SV=1	Leucine-rich repeat (LRR) family protein	-	-	-	-
CsGy2G011780	969.474	1444.18	494.764	0.342591	-1.54544	2.67586e-05	0.00348767	Chr2	11760958	11762399	-	1127	-	GO:0010183;GO:0036033;	-	virNOG18243	S	sp|Q9XIM0|MEE14_ARATH CCG-binding protein 1 OS=Arabidopsis thaliana GN=MEE14 PE=1 SV=1	CCG-binding protein 1	GO:0010183//pollen tube guidance;	-	GO:0036033//mediator complex binding;	-
CsGy2G010520	592.606	1034.7	150.515	0.145467	-2.78123	2.78861e-05	0.00350842	Chr2	10344003	10346451	-	1770	-	GO:0016491;GO:0046872;GO:0055114;	-	virNOG04549	Q	sp|P93824|ACCH6_ARATH 1-aminocyclopropane-1-carboxylate oxidase homolog 6 OS=Arabidopsis thaliana GN=At1g04350 PE=2 SV=1	1-aminocyclopropane-1-carboxylate oxidase homolog 6	GO:0055114//obsolete oxidation-reduction process;	-	GO:0016491//oxidoreductase activity;GO:0046872//metal ion binding;	-
CsGy3G041200	54.5069	85.0028	24.011	0.282473	-1.82381	2.93122e-05	0.0036624	Chr3	38529079	38529756	+	678	-	-	-	virNOG21463	S	sp|Q9SGS5|Y1607_ARATH Uncharacterized protein At1g76070 OS=Arabidopsis thaliana GN=At1g76070 PE=1 SV=1	hypothetical protein	-	-	-	-
CsGy2G025980	301.11	403.891	198.329	0.491046	-1.02607	3.58624e-05	0.00433146	Chr2	33501692	33505337	-	1879	-	-	-	virNOG08409;NOG208934	R	-	alpha/beta-Hydrolases superfamily protein	-	-	-	-
CsGy6G031980	117.45	169.661	65.24	0.384532	-1.37883	4.0374e-05	0.00480746	Chr6	29420847	29423168	+	831	-	GO:0004568;GO:0005975;GO:0006032;GO:0008061;GO:0016998;	K20547	virNOG01205	G	sp|Q09023|CHI2_BRANA Endochitinase CH25 OS=Brassica napus PE=2 SV=1	Chitinase	GO:0005975//carbohydrate metabolic process;GO:0006032//chitin catabolic process;GO:0016998//cell wall macromolecule catabolic process;	-	GO:0004568//chitinase activity;GO:0008061//chitin binding;	ko04016(MAPK signaling pathway - plant);ko00520(Amino sugar and nucleotide sugar metabolism)
CsGy2G020280	1077.24	1516.45	638.016	0.420729	-1.24904	4.05995e-05	0.00480746	Chr2	29275738	29280244	+	1655	-	GO:0006508;GO:0008234;	K01373	virNOG00796	O	sp|P43296|RD19A_ARATH Cysteine protease RD19A OS=Arabidopsis thaliana GN=RD19A PE=1 SV=1	Cysteine protease	GO:0006508//proteolysis;	-	GO:0008234//cysteine-type peptidase activity;	ko04626(Plant-pathogen interaction);ko04210(Apoptosis);ko04142(Lysosome)
CsGy2G020080	277.78	385.836	169.724	0.439886	-1.1848	4.10794e-05	0.00483269	Chr2	29165741	29166238	+	498	-	GO:0003700;GO:0006355;	-	virNOG22608;virNOG21589	K	sp|C0Z2L5|BZP44_ARATH bZIP transcription factor 44 OS=Arabidopsis thaliana GN=BZIP44 PE=1 SV=1	bZIP transcription factor 53	GO:0006355//regulation of transcription, DNA-templated;	-	GO:0003700//DNA-binding transcription factor activity;	-
CsGy5G001890	206.616	283.632	129.6	0.456928	-1.12996	4.4176e-05	0.0050728	Chr5	1182573	1188832	-	1862	-	GO:0004849;GO:0005524;GO:0005829;GO:0006206;GO:0006222;GO:0009507;GO:0016310;GO:0043097;	-	virNOG07785	HF	-	putative uridine kinase C227.14	GO:0006206//pyrimidine nucleobase metabolic process;GO:0006222//UMP biosynthetic process;GO:0016310//phosphorylation;GO:0043097//pyrimidine nucleoside salvage;	GO:0005829//cytosol;GO:0009507//chloroplast;	GO:0004849//uridine kinase activity;GO:0005524//ATP binding;	-
CsGy0G000400	140.992	207.481	74.5028	0.359083	-1.47761	4.42403e-05	0.0050728	Chr0	8004154	8009325	+	1894	-	GO:0016020;	-	virNOG05436	P	sp|Q6R8G7|PHO13_ARATH Phosphate transporter PHO1 homolog 3 OS=Arabidopsis thaliana GN=PHO1;H3 PE=2 SV=2	phosphate transporter PHO1 homolog 9-like	-	GO:0016020//membrane;	-	-
CsGy4G017900	3851.41	5291.19	2411.62	0.45578	-1.13359	4.92557e-05	0.00561236	Chr4	23072527	23086278	+	4450	-	GO:0004134;GO:0005977;GO:2001070;	K00705	virNOG00264	G	sp|Q8RXD9|DPE2_ARATH 4-alpha-glucanotransferase DPE2 OS=Arabidopsis thaliana GN=DPE2 PE=1 SV=1	4-alpha-glucanotransferase DPE2	GO:0005977//glycogen metabolic process;	-	GO:0004134//4-alpha-glucanotransferase activity;GO:2001070//starch binding;	ko00500(Starch and sucrose metabolism)
CsGy3G041660	177.853	249.151	106.555	0.427671	-1.22543	5.25679e-05	0.00595233	Chr3	38878674	38884108	-	3637	-	-	-	virNOG14364	S	sp|Q84MB2|TIF8_ARATH Protein TIFY 8 OS=Arabidopsis thaliana GN=TIFY8 PE=1 SV=1	protein TIFY 8-like isoform X2	-	-	-	-
CsGy2G023220	259.057	347.074	171.039	0.492803	-1.02092	5.98391e-05	0.00648522	Chr2	31290110	31291144	-	1035	-	GO:0016021;	-	virNOG06268	G	sp|Q9SKJ7|PT225_ARATH Probable sugar phosphate/phosphate translocator At2g25520 OS=Arabidopsis thaliana GN=At2g25520 PE=1 SV=1	Probable sugar phosphate/phosphate translocator At5g25400	-	GO:0016021//integral component of membrane;	-	-
CsGy3G043290	3668.5	5158.41	2178.58	0.422336	-1.24354	7.12378e-05	0.00737494	Chr3	40248748	40257417	+	4122	-	GO:0004612;GO:0005524;GO:0005737;GO:0006094;GO:0016301;GO:0016310;	K01610	virNOG02962	C	sp|P42066|PCKA_CUCSA Phosphoenolpyruvate carboxykinase (ATP) OS=Cucumis sativus GN=PCK PE=2 SV=1	Phosphoenolpyruvate carboxykinase (ATP)	GO:0006094//gluconeogenesis;GO:0016310//phosphorylation;	GO:0005737//cytoplasm;	GO:0004612//phosphoenolpyruvate carboxykinase (ATP) activity;GO:0005524//ATP binding;GO:0016301//kinase activity;	ko00710(Carbon fixation in photosynthetic organisms);ko00620(Pyruvate metabolism);ko00020(Citrate cycle (TCA cycle));ko00010(Glycolysis / Gluconeogenesis)
CsGy2G005670	296.02	453.439	138.6	0.305664	-1.70998	7.54676e-05	0.00768116	Chr2	3974948	3975481	+	534	-	GO:0046983;	-	virNOG22432	S	sp|Q9M0B9|IBL1_ARATH Transcription factor IBH1-like 1 OS=Arabidopsis thaliana GN=IBL1 PE=1 SV=1	transcription factor IBH1-like	-	-	GO:0046983//protein dimerization activity;	-
CsGy5G003270	46.2432	72.8583	19.628	0.2694	-1.89218	8.11521e-05	0.00812284	Chr5	2138165	2143932	+	1954	-	GO:0000977;GO:0003700;GO:0005634;GO:0045944;GO:0046983;	K09260	virNOG19641;virNOG34466	K	sp|O82743|AGL19_ARATH Agamous-like MADS-box protein AGL19 OS=Arabidopsis thaliana GN=AGL19 PE=1 SV=1	MADS-box transcription factor 50	GO:0045944//positive regulation of transcription by RNA polymerase II;	GO:0005634//nucleus;	GO:0000977//RNA polymerase II transcription regulatory region sequence-specific DNA binding;GO:0003700//DNA-binding transcription factor activity;GO:0046983//protein dimerization activity;	ko05418(Fluid shear stress and atherosclerosis);ko04928(Parathyroid hormone synthesis, secretion and action);ko04371(Apelin signaling pathway);ko04022(cGMP-PKG signaling pathway);ko04013(MAPK signaling pathway - fly)
CsGy2G022830	66.456	100.802	32.1096	0.31854	-1.65045	9.11947e-05	0.00899366	Chr2	31037987	31039647	-	845	-	-	-	-	-	-	coiled-coil domain-containing protein 93 isoform X1	-	-	-	-
CsGy7G019440	144.777	199.371	90.1819	0.452331	-1.14455	9.40053e-05	0.00910745	Chr7	22014904	22017471	-	2568	-	GO:0004674;GO:0005524;GO:0006468;	-	virNOG01525	T	sp|Q9T020|Y4391_ARATH Probable receptor-like protein kinase At4g39110 OS=Arabidopsis thaliana GN=At4g39110 PE=3 SV=1	Putative receptor-like protein kinase	GO:0006468//protein phosphorylation;	-	GO:0004674//protein serine/threonine kinase activity;GO:0005524//ATP binding;	-
CsGy6G013900	202.548	279.481	125.615	0.449458	-1.15374	0.000102394	0.00986742	Chr6	12336332	12338342	+	1208	-	GO:0006857;GO:0016021;GO:0022857;GO:0055085;	K14638	virNOG02212	E	sp|Q9M390|PTR1_ARATH Protein NRT1/ PTR FAMILY 8.1 OS=Arabidopsis thaliana GN=NPF8.1 PE=1 SV=1	protein NRT1/ PTR FAMILY 8.1-like	GO:0006857//oligopeptide transport;GO:0055085//transmembrane transport;	GO:0016021//integral component of membrane;	GO:0022857//transmembrane transporter activity;	-
CsGy3G015630	24.0715	41.6163	6.52665	0.156829	-2.67273	0.000111583	0.010584	Chr3	11543751	11545143	+	465	-	GO:0006952;GO:0009607;	-	virNOG24009;euNOG20118;virNOG21720	S	sp|Q941R6|MLP31_ARATH MLP-like protein 31 OS=Arabidopsis thaliana GN=MLP31 PE=2 SV=2	MLP-like protein 31	GO:0006952//defense response;GO:0009607//response to biotic stimulus;	-	-	-
CsGy3G037460	336.65	470.042	203.258	0.432426	-1.20947	0.00011842	0.0110021	Chr3	35318213	35323433	-	2086	-	GO:0005983;GO:0006470;GO:0008138;GO:0009569;GO:0009570;GO:0019203;	-	virNOG01454	V	sp|F4J117|LSF1_ARATH Phosphoglucan phosphatase LSF1, chloroplastic OS=Arabidopsis thaliana GN=LSF1 PE=1 SV=1	phosphoglucan phosphatase LSF1, chloroplastic-like	GO:0005983//starch catabolic process;GO:0006470//protein dephosphorylation;	GO:0009569//chloroplast starch grain;GO:0009570//chloroplast stroma;	GO:0008138//protein tyrosine/serine/threonine phosphatase activity;GO:0019203//carbohydrate phosphatase activity;	-
CsGy5G014450	229.642	393.01	66.2738	0.168631	-2.56806	0.000129031	0.0119268	Chr5	19899911	19900786	+	776	-	-	-	virNOG23210	S	-	senescence-associated family protein%2C putative (DUF581)	-	-	-	-
CsGy1G025460	148.324	262.119	34.5292	0.131731	-2.92433	0.000133534	0.0122184	Chr1	24380825	24384649	-	525	-	-	-	-	-	-	Uncharacterized protein	-	-	-	-
CsGy3G042120	192.378	260.463	124.293	0.477202	-1.06733	0.000173696	0.0155523	Chr3	39267443	39268252	-	678	-	-	-	virNOG03521;virNOG23258	KU	-	stress response NST1-like protein	-	-	-	-
CsGy2G006470	78.6801	114.755	42.6053	0.371272	-1.42945	0.000179448	0.0158588	Chr2	4800757	4802104	-	697	-	-	-	virNOG35876;virNOG27145	R	sp|P82773|DF182_ARATH Defensin-like protein 182 OS=Arabidopsis thaliana GN=PDF3.2 PE=2 SV=1	Defensin-like protein 182	-	-	-	-
CsGy1G013650	232.922	372.751	93.0931	0.249746	-2.00147	0.000187394	0.0163068	Chr1	9190530	9193398	-	1130	-	GO:0004089;GO:0006730;GO:0008270;	K01674	virNOG00515;virNOG12609	R	sp|Q8L817|ATCA7_ARATH Alpha carbonic anhydrase 7 OS=Arabidopsis thaliana GN=ACA7 PE=2 SV=1	alpha carbonic anhydrase 7-like	GO:0006730//one-carbon metabolic process;	-	GO:0004089//carbonate dehydratase activity;GO:0008270//zinc ion binding;	ko00910(Nitrogen metabolism)
CsGy3G001660	191.857	257.388	126.325	0.490797	-1.0268	0.000223536	0.0190556	Chr3	1241058	1241642	+	585	-	GO:0003676;	-	virNOG21047;virNOG19068	K	sp|O80942|ZFP10_ARATH Zinc finger protein 10 OS=Arabidopsis thaliana GN=ZFP10 PE=2 SV=1	Palmate-like pentafoliata 1 transcription factor	-	-	GO:0003676//nucleic acid binding;	-
CsGy6G032840	560.466	792.213	328.719	0.414938	-1.26903	0.000231474	0.0190618	Chr6	29859603	29860777	-	669	-	GO:0009409;GO:0009414;GO:0009534;GO:0009651;GO:0044183;GO:0061077;	-	virNOG19047	S	sp|Q94AU9|RBCX1_ARATH Chaperonin-like RBCX protein 1, chloroplastic OS=Arabidopsis thaliana GN=RBCX1 PE=1 SV=1	Chaperonin-like RbcX protein	GO:0009409//response to cold;GO:0009414//response to water deprivation;GO:0009651//response to salt stress;GO:0061077//chaperone-mediated protein folding;	GO:0009534//chloroplast thylakoid;	GO:0044183//protein folding chaperone;	-
CsGy1G006830	165.119	224.37	105.869	0.47185	-1.0836	0.000241756	0.0197407	Chr1	4378253	4381093	-	1464	-	GO:0004252;GO:0006508;	-	virNOG03975	S	-	alpha/beta hydrolase family protein	GO:0006508//proteolysis;	-	GO:0004252//serine-type endopeptidase activity;	-
CsGy7G007160	124.108	197.088	51.1293	0.259424	-1.94662	0.000241896	0.0197407	Chr7	5153014	5157732	+	2202	-	-	-	virNOG23762;virNOG36926	S	-	cold regulated protein 27	-	-	-	-
CsGy1G029440	103.812	156.496	51.1276	0.326702	-1.61395	0.000254324	0.0202087	Chr1	27542247	27550943	+	348	-	GO:0004553;GO:0005975;	K01188	virNOG17139;virNOG09822	G	sp|P26205|BGLT_TRIRP Cyanogenic beta-glucosidase (Fragment) OS=Trifolium repens GN=LI PE=1 SV=1	beta-glucosidase 12	GO:0005975//carbohydrate metabolic process;	-	GO:0004553//hydrolase activity, hydrolyzing O-glycosyl compounds;	ko00940(Phenylpropanoid biosynthesis);ko00500(Starch and sucrose metabolism);ko00460(Cyanoamino acid metabolism)
CsGy3G005540	146.192	233.346	59.0378	0.253006	-1.98276	0.000264732	0.0207625	Chr3	4473569	4474210	+	642	-	-	-	virNOG17824	S	-	Potassium/sodium hyperpolarization-activated cyclic nucleotide-gated channel 1	-	-	-	-
CsGy4G004320	165.624	223.03	108.217	0.485211	-1.04331	0.00027256	0.021193	Chr4	2821798	2827696	+	1852	-	GO:0005739;GO:0009536;GO:0016020;GO:0017121;GO:0017128;	-	virNOG11077	M	sp|P47140|AIM25_YEAST Altered inheritance rate of mitochondria protein 25 OS=Saccharomyces cerevisiae (strain ATCC 204508 / S288c) GN=AIM25 PE=3 SV=1	Phospholipid scramblase	GO:0017121//plasma membrane phospholipid scrambling;	GO:0005739//mitochondrion;GO:0009536//plastid;GO:0016020//membrane;	GO:0017128//phospholipid scramblase activity;	-
CsGy7G006240	734.282	1233.26	235.304	0.190798	-2.38988	0.000277109	0.0212728	Chr7	4582528	4584656	+	1334	-	GO:0005576;	K13449	virNOG19166;virNOG25063;virNOG14826	S	sp|P33154|PR1_ARATH Pathogenesis-related protein 1 OS=Arabidopsis thaliana GN=At2g14610 PE=1 SV=1	Cysteine-rich venom protein	-	GO:0005576//extracellular region;	-	ko04626(Plant-pathogen interaction);ko04075(Plant hormone signal transduction);ko04016(MAPK signaling pathway - plant)
CsGy1G008890	42.5241	66.6401	18.4082	0.276234	-1.85604	0.000291054	0.0218798	Chr1	5553953	5554576	+	624	-	GO:0004497;GO:0005506;GO:0016021;GO:0016705;GO:0020037;GO:0055114;	-	COG2124;virNOG06151;virNOG03061	Q	sp|P24465|C71A1_PERAE Cytochrome P450 71A1 OS=Persea americana GN=CYP71A1 PE=1 SV=2	Cytochrome P450	GO:0055114//obsolete oxidation-reduction process;	GO:0016021//integral component of membrane;	GO:0004497//monooxygenase activity;GO:0005506//iron ion binding;GO:0016705//oxidoreductase activity, acting on paired donors, with incorporation or reduction of molecular oxygen;GO:0020037//heme binding;	-
CsGy6G001000	87.0251	135.267	38.7828	0.286712	-1.80233	0.000310846	0.0230804	Chr6	690993	696881	+	831	-	GO:0009733;	K14488	virNOG24062;virNOG22840	S	sp|O22150|SAU36_ARATH Auxin-responsive protein SAUR36 OS=Arabidopsis thaliana GN=SAUR36 PE=2 SV=1	auxin-responsive protein SAUR36-like	GO:0009733//response to auxin;	-	-	ko04075(Plant hormone signal transduction)
CsGy2G019780	73.2545	112.78	33.7288	0.299066	-1.74146	0.000323845	0.0238714	Chr2	29009578	29009880	-	303	-	GO:0003677;GO:0005634;	-	virNOG23401;virNOG23614	K	sp|Q1A173|RADL6_ARATH Protein RADIALIS-like 6 OS=Arabidopsis thaliana GN=RL6 PE=2 SV=1	protein RADIALIS-like 4	-	GO:0005634//nucleus;	GO:0003677//DNA binding;	-
CsGy5G028510	169.041	258.37	79.7108	0.308514	-1.69659	0.000333618	0.0242737	Chr5	32166345	32171534	-	1689	-	GO:0016020;	-	virNOG05436;COG5409	TP	sp|Q9LJW0|PHO19_ARATH Phosphate transporter PHO1 homolog 9 OS=Arabidopsis thaliana GN=PHO1-H9 PE=2 SV=1	phosphate transporter PHO1 homolog 9-like	-	GO:0016020//membrane;	-	-
CsGy3G024540	2228.42	4241.86	214.967	0.0506776	-4.30251	0.000402375	0.0284759	Chr3	24630945	24633184	-	817	-	GO:0007623;GO:0098807;	-	virNOG23051	S	sp|Q96500|LIRP1_ARATH Light-regulated protein 1, chloroplastic OS=Arabidopsis thaliana GN=LIR1 PE=1 SV=1	light-regulated protein isoform X3	GO:0007623//circadian rhythm;	GO:0098807//chloroplast thylakoid membrane protein complex;	-	-
CsGy3G040370	129.311	176.892	81.7289	0.462027	-1.11395	0.000416448	0.0290184	Chr3	37806075	37808734	+	1479	-	GO:0030246;	-	virNOG11647;virNOG01678	R	sp|F4HQX1|JAL3_ARATH Jacalin-related lectin 3 OS=Arabidopsis thaliana GN=JAL3 PE=2 SV=1	jacalin-related lectin 3-like	-	-	GO:0030246//carbohydrate binding;	-
CsGy4G022750	338.012	519.287	156.737	0.301831	-1.72818	0.000502392	0.0338358	Chr4	29098733	29100940	+	1931	-	GO:0016787;	K13051	virNOG06201	E	sp|Q8GXG1|ASPGB_ARATH Probable isoaspartyl peptidase/L-asparaginase 2 OS=Arabidopsis thaliana GN=At3g16150 PE=2 SV=2	probable isoaspartyl peptidase/L-asparaginase 2	-	-	GO:0016787//hydrolase activity;	ko00460(Cyanoamino acid metabolism);ko00250(Alanine, aspartate and glutamate metabolism)
CsGy2G017730	4390.3	6002.09	2778.5	0.462921	-1.11116	0.000546798	0.036287	Chr2	27635071	27640799	+	2765	-	GO:0004672;GO:0005524;GO:0005634;GO:0005829;GO:0006468;GO:0048586;GO:0071472;	K08818	NOG02830;virNOG03111	T	sp|A2XUW1|CDKG2_ORYSI Cyclin-dependent kinase G-2 OS=Oryza sativa subsp. indica GN=CDKG-2 PE=3 SV=1	cyclin-dependent kinase G-2 isoform X1	GO:0006468//protein phosphorylation;GO:0048586//regulation of long-day photoperiodism, flowering;GO:0071472//cellular response to salt stress;	GO:0005634//nucleus;GO:0005829//cytosol;	GO:0004672//protein kinase activity;GO:0005524//ATP binding;	-
CsGy3G035530	113.052	155.223	70.8814	0.456643	-1.13086	0.00056262	0.0372007	Chr3	34016853	34020032	+	2705	-	GO:0005634;GO:0005737;GO:0009864;GO:0019005;GO:0030162;GO:0031625;GO:0043161;	K14508	virNOG00233	R	sp|Q9ZVC2|NPR5_ARATH Regulatory protein NPR5 OS=Arabidopsis thaliana GN=NPR5 PE=1 SV=1	BTB/POZ domain and ankyrin repeat-containing protein NPR5	GO:0009864//induced systemic resistance, jasmonic acid mediated signaling pathway;GO:0030162//regulation of proteolysis;GO:0043161//proteasome-mediated ubiquitin-dependent protein catabolic process;	GO:0005634//nucleus;GO:0005737//cytoplasm;GO:0019005//SCF ubiquitin ligase complex;	GO:0031625//ubiquitin protein ligase binding;	ko04075(Plant hormone signal transduction)
CsGy7G003180	941.556	1386.53	496.577	0.358143	-1.48139	0.000572684	0.0377284	Chr7	2488596	2494370	+	1944	-	GO:0004497;GO:0005506;GO:0009941;GO:0016125;GO:0016705;GO:0016829;GO:0020037;GO:0055114;	K10528	virNOG13649	Q	sp|K4CF70|HPL_SOLLC Fatty acid hydroperoxide lyase, chloroplastic OS=Solanum lycopersicum GN=HPL PE=1 SV=1	fatty acid hydroperoxide lyase, chloroplastic	GO:0016125//sterol metabolic process;GO:0055114//obsolete oxidation-reduction process;	GO:0009941//chloroplast envelope;	GO:0004497//monooxygenase activity;GO:0005506//iron ion binding;GO:0016705//oxidoreductase activity, acting on paired donors, with incorporation or reduction of molecular oxygen;GO:0016829//lyase activity;GO:0020037//heme binding;	ko00592(alpha-Linolenic acid metabolism)
CsGy1G025100	41.8585	65.1349	18.5822	0.285287	-1.80951	0.000587998	0.0383193	Chr1	24079600	24081261	-	834	-	GO:0003677;GO:0007275;GO:0050794;	K09422	virNOG05184	K	sp|Q8VZQ2|MYB61_ARATH Transcription factor MYB61 OS=Arabidopsis thaliana GN=MYB61 PE=2 SV=1	transcription factor MYB86	GO:0007275//multicellular organism development;GO:0050794//regulation of cellular process;	-	GO:0003677//DNA binding;	-
CsGy4G005630	442.465	657.047	227.883	0.346829	-1.5277	0.000591768	0.0384267	Chr4	4033898	4038799	+	4381	-	GO:0003677;GO:0005634;GO:0006355;	-	virNOG17812	K	sp|Q9MAN1|NGA3_ARATH B3 domain-containing transcription factor NGA3 OS=Arabidopsis thaliana GN=NGA3 PE=2 SV=1	B3 domain-containing transcription factor NGA2-like	GO:0006355//regulation of transcription, DNA-templated;	GO:0005634//nucleus;	GO:0003677//DNA binding;	-
CsGy6G025300	77.879	116.48	39.2775	0.337202	-1.56831	0.000638717	0.0401793	Chr6	24884850	24885468	+	384	-	-	-	virNOG21688;euNOG25447	S	-	hypothetical protein	-	-	-	-
CsGy7G004150	43.7858	69.7694	17.8022	0.255157	-1.97054	0.000643787	0.0403581	Chr7	3103840	3106935	+	2285	-	GO:0003723;GO:0004519;GO:0009451;GO:0043231;	-	virNOG10113;virNOG28544;virNOG03752	R	sp|Q9SKU6|PP166_ARATH Pentatricopeptide repeat-containing protein At2g20710, mitochondrial OS=Arabidopsis thaliana GN=At2g20710 PE=2 SV=1	Pentatricopeptide repeat-containing protein, putative	GO:0009451//RNA modification;	GO:0043231//intracellular membrane-bounded organelle;	GO:0003723//RNA binding;GO:0004519//endonuclease activity;	-
CsGy1G033120	591.278	924.451	258.104	0.279197	-1.84064	0.000710448	0.0427614	Chr1	32869017	32871998	-	1625	-	GO:0005385;GO:0016021;GO:0071577;	K14709	virNOG11346	P	sp|Q8W245|ZIP10_ARATH Probable zinc transporter 10 OS=Arabidopsis thaliana GN=ZIP10 PE=1 SV=2	Probable zinc transporter 10	GO:0071577//zinc ion transmembrane transport;	GO:0016021//integral component of membrane;	GO:0005385//zinc ion transmembrane transporter activity;	ko05012(Parkinson disease);ko05010(Alzheimer disease)
CsGy3G034360	61.4025	90.6774	32.1275	0.354306	-1.49693	0.000735702	0.0438153	Chr3	33116773	33122102	-	1382	-	GO:0016811;	-	virNOG05949	S	sp|O22944|NTAQ1_ARATH Protein N-terminal glutamine amidohydrolase OS=Arabidopsis thaliana GN=At2g41760 PE=1 SV=1	protein N-terminal glutamine amidohydrolase-like	-	-	GO:0016811//hydrolase activity, acting on carbon-nitrogen (but not peptide) bonds, in linear amides;	-
CsGy7G006800	235.163	342.427	127.9	0.37351	-1.42078	0.00074005	0.0438153	Chr7	4972571	4973989	+	1419	-	GO:0008152;GO:0016758;	-	virNOG01591	CG	sp|Q9MB73|LGT_CITUN Limonoid UDP-glucosyltransferase OS=Citrus unshiu PE=2 SV=1	Glycosyltransferase	GO:0008152//metabolic process;	-	GO:0016758//hexosyltransferase activity;	-
CsGy7G008630	98.9688	149.947	47.9908	0.320053	-1.64362	0.000762979	0.0447343	Chr7	10486923	10490769	-	1604	-	GO:0008168;GO:0032259;	K18848	virNOG08092	R	sp|Q9FLN8|IAMT1_ARATH Indole-3-acetate O-methyltransferase 1 OS=Arabidopsis thaliana GN=IAMT1 PE=1 SV=1	indole-3-acetate O-methyltransferase 1	GO:0032259//methylation;	-	GO:0008168//methyltransferase activity;	-
CsGy5G024600	564.236	852.995	275.477	0.322952	-1.63061	0.000854342	0.0474789	Chr5	29183421	29185180	-	1299	-	GO:0015031;	K19476	virNOG09613	Z	sp|Q54I39|IST1L_DICDI IST1-like protein OS=Dictyostelium discoideum GN=DDB_G0289029 PE=3 SV=1	Regulator of Vps4 activity in the MVB pathway protein	GO:0015031//protein transport;	-	-	ko04144(Endocytosis)
CsGy5G029880	129.279	176.515	82.0417	0.464785	-1.10537	0.000904105	0.0497862	Chr5	33077717	33084530	+	2165	-	GO:0003896;GO:0006269;	K02684	virNOG07647	L	sp|P20664|PRI1_MOUSE DNA primase small subunit OS=Mus musculus GN=Prim1 PE=1 SV=1	DNA primase	GO:0006269//DNA replication, synthesis of RNA primer;	-	GO:0003896//DNA primase activity;	ko03030(DNA replication)
CsGy4G005130	86.5422	133.051	40.0339	0.300892	-1.73268	0.00103082	0.0552525	Chr4	3670797	3672484	+	1603	-	-	-	virNOG15746;virNOG08480	S	sp|Q9FXH7|SRS7_ARATH Protein SHI RELATED SEQUENCE 7 OS=Arabidopsis thaliana GN=SRS7 PE=1 SV=1	protein SHI RELATED SEQUENCE 1-like	-	-	-	-
CsGy3G035620	419.203	562.319	276.086	0.490977	-1.02627	0.00112664	0.0588113	Chr3	34092208	34093053	-	648	-	-	-	virNOG26484;virNOG37682	R	-	Calcium-transporting ATPase 9, plasma membrane-type-like protein	-	-	-	-
CsGy7G010010	88.3255	137.993	38.658	0.280145	-1.83576	0.00112968	0.0588113	Chr7	12630323	12632867	+	1232	-	GO:0003700;GO:0005634;GO:0006355;GO:0043565;	-	virNOG05388	K	sp|Q8VWJ2|WRK28_ARATH Probable WRKY transcription factor 28 OS=Arabidopsis thaliana GN=WRKY28 PE=2 SV=1	probable WRKY transcription factor 71 isoform X1	GO:0006355//regulation of transcription, DNA-templated;	GO:0005634//nucleus;	GO:0003700//DNA-binding transcription factor activity;GO:0043565//sequence-specific DNA binding;	-
CsGy5G001180	1519.82	2288.89	750.754	0.327999	-1.60824	0.00116583	0.0600037	Chr5	662411	663455	+	825	-	GO:0005887;GO:0006833;GO:0015250;GO:0034220;	K09874	COG0580;virNOG08598	G	sp|Q0IWF3|NIP31_ORYSJ Aquaporin NIP3-1 OS=Oryza sativa subsp. japonica GN=NIP3-1 PE=2 SV=2	probable aquaporin NIP5-1	GO:0006833//water transport;GO:0034220//ion transmembrane transport;	GO:0005887//integral component of plasma membrane;	GO:0015250//water channel activity;	-
CsGy0G000200	12.9558	23.4953	2.4164	0.102846	-3.28144	0.00119811	0.061317	Chr0	5684488	5689121	-	3159	-	GO:0000779;GO:0000799;GO:0003682;GO:0007076;GO:0010032;GO:0042393;GO:0051304;	K11491	virNOG06119	S	sp|Q6ZQK0|CNDD3_MOUSE Condensin-2 complex subunit D3 OS=Mus musculus GN=Ncapd3 PE=1 SV=3	condensin-2 complex subunit D3	GO:0007076//mitotic chromosome condensation;GO:0010032//meiotic chromosome condensation;GO:0051304//chromosome separation;	GO:0000779//condensed chromosome, centromeric region;	GO:0003682//chromatin binding;GO:0042393//histone binding;	-
CsGy5G005830	1083.82	1445.64	721.999	0.499433	-1.00164	0.00123076	0.0619903	Chr5	3860113	3860657	+	441	-	-	-	virNOG01426	R	sp|Q9LEX0|P2A13_ARATH F-box protein PP2-A13 OS=Arabidopsis thaliana GN=PP2A13 PE=1 SV=1	F-box protein PP2-A13-like	-	-	-	-
CsGy1G013670	1265.32	1975.96	554.667	0.280707	-1.83286	0.00124673	0.0623952	Chr1	9198420	9201603	-	1211	-	GO:0004089;GO:0006730;GO:0008270;	K01674	virNOG00515;virNOG12609	R	sp|Q8L817|ATCA7_ARATH Alpha carbonic anhydrase 7 OS=Arabidopsis thaliana GN=ACA7 PE=2 SV=1	alpha carbonic anhydrase 7-like	GO:0006730//one-carbon metabolic process;	-	GO:0004089//carbonate dehydratase activity;GO:0008270//zinc ion binding;	ko00910(Nitrogen metabolism)
CsGy2G025690	25.7679	43.9857	7.55014	0.17165	-2.54246	0.00134598	0.0664446	Chr2	33150791	33153049	+	1216	-	GO:0003700;GO:0006355;	-	virNOG19004;virNOG03470	K	sp|F4IN23|BZP34_ARATH Basic leucine zipper 34 OS=Arabidopsis thaliana GN=BZIP34 PE=1 SV=1	basic leucine zipper 34-like	GO:0006355//regulation of transcription, DNA-templated;	-	GO:0003700//DNA-binding transcription factor activity;	-
CsGy1G014340	765.681	1082.71	448.656	0.414383	-1.27096	0.00143951	0.0686307	Chr1	10105631	10109478	+	1528	-	GO:0009507;GO:0045454;	-	virNOG00219	S	sp|O23193|CBSX1_ARATH CBS domain-containing protein CBSX1, chloroplastic OS=Arabidopsis thaliana GN=CBSX1 PE=1 SV=2	CBS domain-containing protein CBSX1, chloroplastic-like	GO:0045454//cell redox homeostasis;	GO:0009507//chloroplast;	-	-
CsGy3G015930	37.4379	56.6036	18.2721	0.322808	-1.63125	0.00146408	0.0692506	Chr3	11836750	11838303	-	617	-	-	-	-	-	-	Uncharacterized protein	-	-	-	-
CsGy3G034140	31.0123	53.2539	8.77082	0.164698	-2.6021	0.00150114	0.0703984	Chr3	32945022	32950634	+	3007	-	GO:0004497;GO:0005506;GO:0016021;GO:0016705;GO:0020037;GO:0055114;	K07408	virNOG00201;virNOG04233	Q	sp|Q42798|C93A1_SOYBN 3,9-dihydroxypterocarpan 6A-monooxygenase OS=Glycine max GN=CYP93A1 PE=1 SV=1	Cytochrome P450	GO:0055114//obsolete oxidation-reduction process;	GO:0016021//integral component of membrane;	GO:0004497//monooxygenase activity;GO:0005506//iron ion binding;GO:0016705//oxidoreductase activity, acting on paired donors, with incorporation or reduction of molecular oxygen;GO:0020037//heme binding;	ko05417(Lipid and atherosclerosis);ko05208(Chemical carcinogenesis - reactive oxygen species);ko05207(Chemical carcinogenesis - receptor activation);ko05204(Chemical carcinogenesis - DNA adducts);ko04913(Ovarian steroidogenesis);ko00980(Metabolism of xenobiotics by cytochrome P450);ko00830(Retinol metabolism);ko00380(Tryptophan metabolism);ko00140(Steroid hormone biosynthesis)
CsGy4G021500	104.084	140.71	67.4583	0.479415	-1.06065	0.00170934	0.0764646	Chr4	28157607	28160239	-	1836	-	GO:0003700;GO:0006355;	-	virNOG19004;virNOG03470	K	sp|F4IN23|BZP34_ARATH Basic leucine zipper 34 OS=Arabidopsis thaliana GN=BZIP34 PE=1 SV=1	Basic leucine zipper 61	GO:0006355//regulation of transcription, DNA-templated;	-	GO:0003700//DNA-binding transcription factor activity;	-
CsGy6G003390	62.8432	93.7036	31.9828	0.341318	-1.55081	0.00187068	0.0818626	Chr6	3066248	3068290	+	687	-	GO:0000786;GO:0003677;GO:0005634;GO:0046982;	K11253	COG2036;virNOG17611	B	sp|P68429|H32_MEDSA Histone H3.2 OS=Medicago sativa GN=H3-1.1 PE=1 SV=2	Histone H3.2	-	GO:0000786//nucleosome;GO:0005634//nucleus;	GO:0003677//DNA binding;GO:0046982//protein heterodimerization activity;	ko05322(Systemic lupus erythematosus);ko05202(Transcriptional misregulation in cancer);ko05131(Shigellosis);ko05034(Alcoholism);ko04613(Neutrophil extracellular trap formation)
CsGy6G005280	158.58	214.356	102.803	0.479591	-1.06012	0.00190265	0.082268	Chr6	4838269	4838664	-	396	-	-	-	-	-	-	Uncharacterized protein	-	-	-	-
CsGy7G008220	93.5864	128.15	59.0227	0.460575	-1.11849	0.00191711	0.0824993	Chr7	9083636	9089750	-	5061	-	GO:0004672;GO:0005524;GO:0006468;GO:0016021;	-	virNOG04835	T	sp|Q9SJQ1|PXC1_ARATH Leucine-rich repeat receptor-like protein kinase PXC1 OS=Arabidopsis thaliana GN=PXC1 PE=1 SV=1	probable leucine-rich repeat receptor-like protein kinase isoform X1	GO:0006468//protein phosphorylation;	GO:0016021//integral component of membrane;	GO:0004672//protein kinase activity;GO:0005524//ATP binding;	-
CsGy1G025290	12.108	21.7275	2.48842	0.114529	-3.12622	0.00210239	0.0876222	Chr1	24248368	24250392	-	1152	-	-	-	virNOG33113;virNOG15018	R	sp|Q3E6P4|FB95_ARATH F-box protein At2g02240 OS=Arabidopsis thaliana GN=At2g02240 PE=2 SV=1	putative F-box protein PP2-B12	-	-	-	-
CsGy3G012220	20.6568	34.4578	6.85578	0.198962	-2.32944	0.00210386	0.0876222	Chr3	9270896	9273138	-	1143	-	GO:0016491;GO:0046872;GO:0055114;	-	virNOG04549	Q	sp|P10967|ACCH3_SOLLC 1-aminocyclopropane-1-carboxylate oxidase homolog OS=Solanum lycopersicum GN=ACO3 PE=2 SV=1	1-aminocyclopropane-1-carboxylate oxidase homolog 1-like	GO:0055114//obsolete oxidation-reduction process;	-	GO:0016491//oxidoreductase activity;GO:0046872//metal ion binding;	-
CsGy3G040530	1996.1	2921.87	1070.34	0.36632	-1.44883	0.00211581	0.0876877	Chr3	37936293	37939371	-	918	-	GO:0004518;GO:0090305;	-	virNOG13268	R	sp|Q9FWS6|BBD1_ARATH Bifunctional nuclease 1 OS=Arabidopsis thaliana GN=BBD1 PE=2 SV=1	bifunctional nuclease 1	GO:0090305//nucleic acid phosphodiester bond hydrolysis;	-	GO:0004518//nuclease activity;	-
CsGy3G033580	327.467	456.805	198.13	0.43373	-1.20513	0.00215419	0.0882976	Chr3	32567902	32569888	+	1621	-	GO:0016021;GO:0052689;	-	virNOG11625;virNOG16783	R	sp|Q9SQR3|D14_ARATH Strigolactone esterase D14 OS=Arabidopsis thaliana GN=D14 PE=1 SV=1	Pimeloyl-[acyl-carrier protein] methyl ester esterase	-	GO:0016021//integral component of membrane;	GO:0052689//carboxylic ester hydrolase activity;	-
CsGy6G014470	88.8262	122.954	54.698	0.444864	-1.16856	0.002162	0.0883568	Chr6	12736213	12737254	-	876	-	-	-	virNOG19200	S	sp|P9WKQ2|Y887_MYCTO Uncharacterized protein MT0910 OS=Mycobacterium tuberculosis (strain CDC 1551 / Oshkosh) GN=MT0910 PE=4 SV=1	Dessication-induced 1VOC superfamily protein	-	-	-	-
CsGy4G011190	363.259	581.855	144.662	0.248622	-2.00797	0.00243138	0.0953447	Chr4	10489255	10497100	+	2988	-	GO:0016021;GO:0055085;	-	virNOG04363	P	sp|Q9FME8|OPT4_ARATH Oligopeptide transporter 4 OS=Arabidopsis thaliana GN=OPT4 PE=1 SV=1	oligopeptide transporter 4	GO:0055085//transmembrane transport;	GO:0016021//integral component of membrane;	-	-
CsGy1G029470	26.0667	45.9308	6.20264	0.135043	-2.88851	0.00252542	0.0975546	Chr1	27570602	27571219	+	474	-	GO:0004553;GO:0005975;	K01188	virNOG09822;COG2723	G	sp|Q7XKV5|BGL11_ORYSJ Beta-glucosidase 11 OS=Oryza sativa subsp. japonica GN=BGLU11 PE=3 SV=2	beta-glucosidase 12	GO:0005975//carbohydrate metabolic process;	-	GO:0004553//hydrolase activity, hydrolyzing O-glycosyl compounds;	ko00940(Phenylpropanoid biosynthesis);ko00500(Starch and sucrose metabolism);ko00460(Cyanoamino acid metabolism)
CsGy1G017330	270.756	372.181	169.331	0.454969	-1.13616	0.00256739	0.0983569	Chr1	15554720	15555520	+	801	-	-	-	virNOG22229;virNOG19601	S	-	Sterile alpha motif, type 2	-	-	-	-
CsGy6G032950	417.21	557.816	276.603	0.495869	-1.01197	0.00256791	0.0983569	Chr6	29926137	29930036	-	1089	-	GO:0016021;	K13347	virNOG12040	R	sp|Q9ZS51|PMP22_ARATH Peroxisomal membrane protein PMP22 OS=Arabidopsis thaliana GN=PMP22 PE=1 SV=1	peroxisomal membrane protein PMP22	-	GO:0016021//integral component of membrane;	-	ko04146(Peroxisome)
CsGy3G030410	210.815	304.118	117.511	0.386399	-1.37184	0.0026024	0.0990497	Chr3	30446704	30448629	+	1926	-	GO:0000145;GO:0006887;	K07195	virNOG01158	U	sp|Q8VY27|E70H1_ARATH Exocyst complex component EXO70H1 OS=Arabidopsis thaliana GN=EXO70H1 PE=1 SV=1	exocyst complex component EXO70B1-like	GO:0006887//exocytosis;	GO:0000145//exocyst;	-	ko05132(Salmonella infection);ko04910(Insulin signaling pathway)
CsGy7G000330	435.137	630.373	239.901	0.380569	-1.39377	0.00272546	0.101391	Chr7	427957	436755	+	3978	-	GO:0003777;GO:0005524;GO:0005874;GO:0007018;GO:0008017;GO:0016021;	K11498	virNOG04890	Z	sp|F4IGL2|KN7E_ARATH Kinesin-like protein KIN-7E OS=Arabidopsis thaliana GN=KIN7E PE=2 SV=1	Kinesin-like protein	GO:0007018//microtubule-based movement;	GO:0005874//microtubule;GO:0016021//integral component of membrane;	GO:0003777//microtubule motor activity;GO:0005524//ATP binding;GO:0008017//microtubule binding;	-
CsGy5G024050	91.6567	138.757	44.5567	0.321114	-1.63884	0.00315896	0.111779	Chr5	28799058	28805112	+	5412	-	GO:0005737;GO:0016209;GO:0055114;	-	virNOG12733	S	sp|Q3ZBK2|F213A_BOVIN Redox-regulatory protein FAM213A OS=Bos taurus GN=FAM213A PE=2 SV=1	Thioredoxin-like protein	GO:0055114//obsolete oxidation-reduction process;	GO:0005737//cytoplasm;	GO:0016209//antioxidant activity;	-
CsGy3G024420	301.483	427.166	175.801	0.411551	-1.28086	0.00331495	0.115717	Chr3	24442732	24444797	-	1337	-	GO:0008168;GO:0032259;	-	virNOG03751	I	-	Methyltransf_11 domain-containing protein	GO:0032259//methylation;	-	GO:0008168//methyltransferase activity;	-
CsGy3G028040	101.184	135.334	67.0348	0.49533	-1.01354	0.00334079	0.116045	Chr3	29027370	29035891	+	2903	-	GO:0004672;GO:0005524;GO:0006468;	K08835	virNOG02713	T	sp|Q551H4|FRAY2_DICDI Serine/threonine-protein kinase fray2 OS=Dictyostelium discoideum GN=fray2 PE=3 SV=1	serine/threonine-protein kinase OSR1 isoform X2	GO:0006468//protein phosphorylation;	-	GO:0004672//protein kinase activity;GO:0005524//ATP binding;	-
CsGy1G027180	101.136	135.11	67.1626	0.497095	-1.00841	0.00338807	0.116917	Chr1	25603057	25607628	+	1861	-	GO:0005743;GO:0016021;GO:0055085;	K15084	virNOG02522	C	sp|F4JU70|COAC2_ARATH Mitochondrial carrier protein CoAc2 OS=Arabidopsis thaliana GN=COAC2 PE=2 SV=1	Mitochondrial carrier protein	GO:0055085//transmembrane transport;	GO:0005743//mitochondrial inner membrane;GO:0016021//integral component of membrane;	-	-
CsGy1G008930	14.3376	26.3504	2.32471	0.0882231	-3.5027	0.00345926	0.118696	Chr1	5577258	5577872	-	615	-	GO:0004497;GO:0005506;GO:0016021;GO:0016705;GO:0020037;GO:0055114;	-	COG2124;virNOG06151;virNOG03061	Q	sp|P24465|C71A1_PERAE Cytochrome P450 71A1 OS=Persea americana GN=CYP71A1 PE=1 SV=2	Cytochrome P450	GO:0055114//obsolete oxidation-reduction process;	GO:0016021//integral component of membrane;	GO:0004497//monooxygenase activity;GO:0005506//iron ion binding;GO:0016705//oxidoreductase activity, acting on paired donors, with incorporation or reduction of molecular oxygen;GO:0020037//heme binding;	-
CsGy6G017040	51.6312	74.4729	28.7895	0.386578	-1.37117	0.00352548	0.120739	Chr6	17598962	17604239	+	1206	-	GO:0022402;GO:0030261;	K11491	virNOG06119	S	-	condensin-2 complex subunit D3	GO:0022402//cell cycle process;GO:0030261//chromosome condensation;	-	-	-
CsGy1G031920	71.3519	104.046	38.6578	0.371545	-1.42839	0.00353616	0.12086	Chr1	30991188	30995431	+	1711	-	GO:0005524;GO:0005871;GO:0005874;GO:0007018;GO:0008017;GO:0008104;GO:0008574;GO:0030705;	K10396	virNOG05411	Z	sp|Q8GW44|KN1_ARATH Kinesin-like protein KIN-1 OS=Arabidopsis thaliana GN=KIN1 PE=1 SV=1	Kinesin-like protein	GO:0007018//microtubule-based movement;GO:0008104//protein localization;GO:0030705//cytoskeleton-dependent intracellular transport;	GO:0005871//kinesin complex;GO:0005874//microtubule;	GO:0005524//ATP binding;GO:0008017//microtubule binding;GO:0008574//plus-end-directed microtubule motor activity;	ko05223(Non-small cell lung cancer);ko05132(Salmonella infection);ko05022(Pathways of neurodegeneration - multiple diseases);ko05020(Prion disease);ko05016(Huntington disease);ko05014(Amyotrophic lateral sclerosis);ko05012(Parkinson disease);ko05010(Alzheimer disease);ko04728(Dopaminergic synapse);ko04144(Endocytosis)
CsGy2G025620	33.0116	52.1588	13.8643	0.26581	-1.91153	0.00382438	0.126205	Chr2	33101401	33103851	-	1582	-	GO:0008171;GO:0032259;GO:0046983;	-	virNOG01933	R	sp|B0ZB57|OMT3_HUMLU Probable O-methyltransferase 3 OS=Humulus lupulus GN=OMT3 PE=2 SV=1	trans-resveratrol di-O-methyltransferase-like isoform X2	GO:0032259//methylation;	-	GO:0008171//O-methyltransferase activity;GO:0046983//protein dimerization activity;	-
CsGy6G013830	78.7501	108.646	48.8538	0.449659	-1.1531	0.00401652	0.130161	Chr6	12271197	12278461	-	1812	-	GO:0005634;GO:0006270;GO:0009744;GO:0051301;	K02213	virNOG03232	L	sp|O82387|CDC6A_ARATH Cell division control protein 6 homolog OS=Arabidopsis thaliana GN=CDC6 PE=2 SV=2	Cell division control protein	GO:0006270//DNA replication initiation;GO:0009744//response to sucrose;GO:0051301//cell division;	GO:0005634//nucleus;	-	ko05207(Chemical carcinogenesis - receptor activation);ko04113(Meiosis - yeast);ko04111(Cell cycle - yeast);ko04110(Cell cycle)
CsGy1G028840	286.28	384.159	188.4	0.490422	-1.0279	0.00412765	0.132825	Chr1	26890681	26895557	-	3007	-	GO:0003700;GO:0006355;	K14432	virNOG13263	S	sp|Q9LES3|AI5L2_ARATH ABSCISIC ACID-INSENSITIVE 5-like protein 2 OS=Arabidopsis thaliana GN=DPBF3 PE=1 SV=1	ABSCISIC ACID-INSENSITIVE 5-like protein 3	GO:0006355//regulation of transcription, DNA-templated;	-	GO:0003700//DNA-binding transcription factor activity;	ko04075(Plant hormone signal transduction)
CsGy3G003630	22.4374	35.9944	8.88046	0.246718	-2.01907	0.00418666	0.134247	Chr3	2954195	2959988	-	1440	-	GO:0000287;GO:0008152;GO:0010333;	K15803	virNOG05092;NOG126252	SR	sp|Q6Q3H3|TPSGD_VITVI (-)-germacrene D synthase OS=Vitis vinifera GN=VIT_19s0014g04930 PE=1 SV=1	(-)-germacrene D synthase-like	GO:0008152//metabolic process;	-	GO:0000287//magnesium ion binding;GO:0010333//terpene synthase activity;	ko00909(Sesquiterpenoid and triterpenoid biosynthesis)
CsGy7G018540	81.5181	111.197	51.8393	0.466194	-1.101	0.00460638	0.142096	Chr7	21537363	21540710	-	1858	-	-	K10268	virNOG03278	R	sp|Q3EC97|FBL14_ARATH F-box/LRR-repeat protein 14 OS=Arabidopsis thaliana GN=FBL14 PE=2 SV=1	F-box/LRR-repeat protein 14	-	-	-	-
CsGy1G022790	103.891	162.424	45.3588	0.279262	-1.84031	0.00478202	0.145281	Chr1	21773238	21777439	+	2263	-	GO:0003677;GO:0003700;GO:0005634;GO:0006355;	-	virNOG26405;virNOG03005	SK	sp|Q9LTH4|PCLL_ARATH Transcription factor BOA OS=Arabidopsis thaliana GN=BOA PE=2 SV=1	Two-component response regulator	GO:0006355//regulation of transcription, DNA-templated;	GO:0005634//nucleus;	GO:0003677//DNA binding;GO:0003700//DNA-binding transcription factor activity;	-
CsGy3G008420	324.542	452.324	196.761	0.434999	-1.20091	0.00485662	0.146159	Chr3	6996074	6997389	-	1163	-	GO:0016021;	-	virNOG26913;virNOG25522	R	sp|Q9M373|AGP20_ARATH Arabinogalactan peptide 20 OS=Arabidopsis thaliana GN=AGP20 PE=3 SV=1	Arabinogalactan peptide 20	-	GO:0016021//integral component of membrane;	-	-
CsGy6G013310	89.4406	119.921	58.9603	0.49166	-1.02427	0.00487441	0.14645	Chr6	11741064	11744365	+	453	-	GO:0004672;GO:0005524;GO:0006468;	-	virNOG08314	T	-	Mast/stem cell growth factor receptor Kit	GO:0006468//protein phosphorylation;	-	GO:0004672//protein kinase activity;GO:0005524//ATP binding;	-
CsGy1G025480	13.1773	22.7064	3.64822	0.16067	-2.63783	0.00508069	0.150403	Chr1	24394055	24403487	-	1784	-	-	-	virNOG02451	S	sp|C0SVV6|CB60A_ARATH Calmodulin-binding protein 60 A OS=Arabidopsis thaliana GN=CBP60A PE=2 SV=1	calmodulin-binding protein 60 B-like isoform X2	-	-	-	-
CsGy4G014690	78.0496	106.393	49.7059	0.46719	-1.09792	0.00509955	0.150416	Chr4	19463326	19465465	+	2054	-	GO:0008152;GO:0043231;GO:0080043;GO:0080044;	-	virNOG10906	CG	sp|U3U992|UGT8_CATRO 7-deoxyloganetic acid glucosyltransferase OS=Catharanthus roseus GN=UGT709C2 PE=1 SV=1	Glycosyltransferase	GO:0008152//metabolic process;	GO:0043231//intracellular membrane-bounded organelle;	GO:0080043//quercetin 3-O-glucosyltransferase activity;GO:0080044//quercetin 7-O-glucosyltransferase activity;	-
CsGy6G036820	114.724	154.396	75.0513	0.486097	-1.04068	0.00512738	0.150696	Chr6	32165635	32168613	-	630	-	-	-	-	-	-	Uncharacterized protein	-	-	-	-
CsGy1G017370	187.57	262.729	112.412	0.427862	-1.22478	0.00514881	0.150696	Chr1	15574443	15578709	-	2434	-	GO:0016021;	-	virNOG14030	R	-	envelope glycoprotein B	-	GO:0016021//integral component of membrane;	-	-
CsGy4G016910	14.8147	24.7425	4.88687	0.197509	-2.34001	0.0054804	0.158355	Chr4	21921522	21925134	+	1254	-	GO:0005783;GO:0016853;GO:0045454;	K09580	virNOG06651	O	sp|Q9XF61|PDI_DATGL Protein disulfide-isomerase OS=Datisca glomerata GN=PDI PE=2 SV=1	protein disulfide-isomerase-like isoform X2	GO:0045454//cell redox homeostasis;	GO:0005783//endoplasmic reticulum;	GO:0016853//isomerase activity;	ko04141(Protein processing in endoplasmic reticulum)
CsGy2G024230	52.1076	73.4548	30.7604	0.418766	-1.25578	0.00574694	0.162293	Chr2	32004666	32005717	-	534	-	GO:0003677;GO:0005524;GO:0016787;	K10896	virNOG09452;virNOG40601	AR	sp|I3XHK1|FANCM_ARATH DEAD-box ATP-dependent RNA helicase FANCM OS=Arabidopsis thaliana GN=FANCM PE=2 SV=1	Fanconi anemia group M protein isoform X1	-	-	GO:0003677//DNA binding;GO:0005524//ATP binding;GO:0016787//hydrolase activity;	ko03460(Fanconi anemia pathway)
CsGy3G036610	7277.28	10431.2	4123.35	0.395289	-1.33902	0.00576784	0.162513	Chr3	34679730	34680762	-	609	-	GO:0005623;GO:0009739;GO:0045454;	-	virNOG22462	R	sp|P46690|GASA4_ARATH Gibberellin-regulated protein 4 OS=Arabidopsis thaliana GN=GASA4 PE=1 SV=2	gibberellin-regulated protein 6	GO:0009739//response to gibberellin;GO:0045454//cell redox homeostasis;	GO:0005623//obsolete cell;	-	-
CsGy5G003230	66.3466	90.3769	42.3162	0.468219	-1.09474	0.00583995	0.163528	Chr5	2100974	2103151	-	1503	-	-	-	-	-	-	Unknown Protein	-	-	-	-
CsGy4G021230	99.7116	132.97	66.4535	0.499764	-1.00068	0.00592041	0.164445	Chr4	27895665	27900497	-	2163	-	GO:0005634;GO:0006260;	K03504	virNOG05779	L	sp|Q9EQ28|DPOD3_MOUSE DNA polymerase delta subunit 3 OS=Mus musculus GN=Pold3 PE=1 SV=2	DNA polymerase delta subunit 3	GO:0006260//DNA replication;	GO:0005634//nucleus;	-	ko03440(Homologous recombination);ko03430(Mismatch repair);ko03420(Nucleotide excision repair);ko03410(Base excision repair);ko03030(DNA replication)
CsGy6G032460	38.5483	55.4524	21.6442	0.39032	-1.35727	0.00615823	0.168095	Chr6	29650993	29656160	-	4558	-	GO:0007010;GO:0008017;GO:0009832;GO:0010051;	-	virNOG04179	Z	sp|Q8GYX3|MP705_ARATH Microtubule-associated protein 70-5 OS=Arabidopsis thaliana GN=MAP70.5 PE=1 SV=1	microtubule-associated protein 70-5	GO:0007010//cytoskeleton organization;GO:0009832//plant-type cell wall biogenesis;GO:0010051//xylem and phloem pattern formation;	-	GO:0008017//microtubule binding;	-
CsGy5G026980	145.384	195.958	94.8111	0.483834	-1.04742	0.00623013	0.168969	Chr5	30701152	30703626	-	1595	-	GO:0005509;GO:0005544;GO:0006950;GO:0009628;	K17099	virNOG01000	U	sp|Q9ZVJ6|ANXD4_ARATH Annexin D4 OS=Arabidopsis thaliana GN=ANN4 PE=1 SV=1	Annexin D4	GO:0006950//response to stress;GO:0009628//response to abiotic stimulus;	-	GO:0005509//calcium ion binding;GO:0005544//calcium-dependent phospholipid binding;	-
CsGy6G002200	14458.1	20049.5	8866.68	0.442239	-1.1771	0.00638094	0.171011	Chr6	1582617	1584097	-	1031	-	GO:0005576;GO:0005618;GO:0009664;GO:0016020;	-	virNOG07797	R	sp|O22874|EXPA8_ARATH Expansin-A8 OS=Arabidopsis thaliana GN=EXPA8 PE=2 SV=1	expansin-A8-like	GO:0009664//plant-type cell wall organization;	GO:0005576//extracellular region;GO:0005618//cell wall;GO:0016020//membrane;	-	-
CsGy5G000400	1160.6	1571.59	749.606	0.476972	-1.06802	0.00642469	0.171929	Chr5	221361	226811	+	2941	-	GO:0004177;GO:0005829;GO:0006508;GO:0008236;	K01278	virNOG03357	O	sp|Q6F3I7|DAP4_PSEMX Dipeptidyl aminopeptidase 4 OS=Pseudoxanthomonas mexicana GN=dap4 PE=1 SV=1	dipeptidyl aminopeptidase 4 isoform X1	GO:0006508//proteolysis;	GO:0005829//cytosol;	GO:0004177//aminopeptidase activity;GO:0008236//serine-type peptidase activity;	ko04974(Protein digestion and absorption)
CsGy2G018030	4768.96	6499.29	3038.64	0.467533	-1.09686	0.00648978	0.173415	Chr2	27849568	27854824	+	2406	-	GO:0006508;GO:0008233;	K01369	virNOG04445	O	sp|P49043|VPE_CITSI Vacuolar-processing enzyme OS=Citrus sinensis PE=2 SV=1	Vacuolar processing enzyme	GO:0006508//proteolysis;	-	GO:0008233//peptidase activity;	ko04612(Antigen processing and presentation);ko04142(Lysosome)
CsGy5G013110	32.0947	47.7074	16.482	0.345482	-1.53332	0.00673103	0.17447	Chr5	16715878	16718210	-	1262	-	-	-	virNOG00644	S	-	plastid transcriptionally active 6	-	-	-	-
CsGy3G038130	178.775	248.849	108.701	0.436815	-1.19491	0.00678141	0.174655	Chr3	35891656	35894520	-	2040	-	GO:0006486;GO:0016021;GO:0016757;	-	virNOG08367	WMG	sp|Q9FFN2|GLYT3_ARATH Probable glycosyltransferase At5g03795 OS=Arabidopsis thaliana GN=At5g03795 PE=3 SV=2	probable glycosyltransferase At5g03795	GO:0006486//protein glycosylation;	GO:0016021//integral component of membrane;	GO:0016757//glycosyltransferase activity;	-
CsGy3G026210	60.1037	82.8219	37.3855	0.451397	-1.14753	0.00703017	0.178134	Chr3	27034040	27035225	-	1116	-	-	-	virNOG27134	S	-	transmembrane protein	-	-	-	-
CsGy1G010260	299.738	493.578	105.898	0.214552	-2.2206	0.00715544	0.18015	Chr1	6392054	6394776	-	1656	-	-	K01054	virNOG02898	I	sp|Q9C942|CSE_ARATH Caffeoylshikimate esterase OS=Arabidopsis thaliana GN=CSE PE=1 SV=1	caffeoylshikimate esterase-like	-	-	-	ko04923(Regulation of lipolysis in adipocytes);ko04723(Retrograde endocannabinoid signaling);ko04714(Thermogenesis);ko00561(Glycerolipid metabolism)
CsGy1G005920	10.8249	18.9418	2.70791	0.142959	-2.80633	0.00730743	0.182338	Chr1	3852422	3852961	+	540	-	GO:0003677;GO:0005634;GO:0006355;	-	virNOG21864	K	sp|Q9FME3|TCP5_ARATH Transcription factor TCP5 OS=Arabidopsis thaliana GN=TCP5 PE=1 SV=1	transcription factor TCP5	GO:0006355//regulation of transcription, DNA-templated;	GO:0005634//nucleus;	GO:0003677//DNA binding;	-
CsGy6G002870	9.05078	16.1634	1.93811	0.119907	-3.06001	0.00732268	0.182338	Chr6	2195895	2196815	-	921	-	GO:0016021;	-	virNOG06063	S	-	polyadenylate-binding protein 1-B-binding protein	-	GO:0016021//integral component of membrane;	-	-
CsGy6G028550	212.261	305.584	118.937	0.389211	-1.36137	0.00744683	0.183557	Chr6	27387016	27395384	-	4319	-	-	-	virNOG00001	S	sp|Q9FHP1|ACR1_ARATH ACT domain-containing protein ACR1 OS=Arabidopsis thaliana GN=ACR1 PE=2 SV=1	ACT domain-containing protein ACR1	-	-	-	-
CsGy1G008810	145.998	214.133	77.863	0.36362	-1.4595	0.00781159	0.18905	Chr1	5512039	5513461	+	1318	-	GO:0010167;GO:0015706;GO:0016021;	-	virNOG17696	G	sp|Q9FGS5|NRT31_ARATH High-affinity nitrate transporter 3.1 OS=Arabidopsis thaliana GN=NRT3.1 PE=1 SV=1	high-affinity nitrate transporter 3.1-like	GO:0010167//response to nitrate;GO:0015706//nitrate transport;	GO:0016021//integral component of membrane;	-	-
CsGy6G005790	71.5937	110.586	32.6015	0.294807	-1.76216	0.00782567	0.18905	Chr6	5185861	5186943	-	826	-	GO:0005509;	-	virNOG19253	T	sp|Q9FYK2|CML25_ARATH Probable calcium-binding protein CML25 OS=Arabidopsis thaliana GN=CML25 PE=2 SV=1	calmodulin-like protein 7	-	-	GO:0005509//calcium ion binding;	-
CsGy6G015870	180.56	265.755	95.3652	0.358847	-1.47856	0.00794966	0.191013	Chr6	14896438	14902441	+	2745	-	GO:0005516;GO:0006952;GO:0009607;GO:0016021;	K08472	virNOG02472	S	sp|Q94KB7|MLO6_ARATH MLO-like protein 6 OS=Arabidopsis thaliana GN=MLO6 PE=2 SV=2	MLO-like protein	GO:0006952//defense response;GO:0009607//response to biotic stimulus;	GO:0016021//integral component of membrane;	GO:0005516//calmodulin binding;	-
CsGy6G030820	43.2587	62.1954	24.322	0.391057	-1.35455	0.00806228	0.191974	Chr6	28831393	28832887	+	1398	-	GO:0005524;GO:0016021;	K08900	virNOG03873	O	sp|Q8GW96|AATP3_ARATH AAA-ATPase At2g18193 OS=Arabidopsis thaliana GN=At2g18193 PE=2 SV=1	ATP-dependent zinc metalloprotease FtsH	-	GO:0016021//integral component of membrane;	GO:0005524//ATP binding;	-
CsGy6G034290	65.3242	88.027	42.6214	0.484185	-1.04637	0.0080744	0.191974	Chr6	30604866	30606600	+	609	-	GO:0003677;GO:0003700;GO:0005634;GO:0006355;GO:0009908;GO:0046872;	-	virNOG21403;virNOG24288	K	sp|Q38741|SBP1_ANTMA Squamosa promoter-binding protein 1 OS=Antirrhinum majus GN=SBP1 PE=2 SV=1	squamosa promoter-binding protein 1	GO:0006355//regulation of transcription, DNA-templated;GO:0009908//flower development;	GO:0005634//nucleus;	GO:0003677//DNA binding;GO:0003700//DNA-binding transcription factor activity;GO:0046872//metal ion binding;	-
CsGy6G002540	58.9671	80.7338	37.2005	0.460779	-1.11785	0.00822126	0.194241	Chr6	1900037	1903292	-	1041	-	GO:0003924;GO:0005525;GO:0005777;GO:0005794;GO:0030742;GO:0080115;	K07910	virNOG05149	U	sp|O49841|RAC2A_ARATH Ras-related protein RABC2a OS=Arabidopsis thaliana GN=RABC2A PE=1 SV=1	Ras-related protein Rab-18-B	-	GO:0005777//peroxisome;GO:0005794//Golgi apparatus;	GO:0003924//GTPase activity;GO:0005525//GTP binding;GO:0030742//GTP-dependent protein binding;GO:0080115//myosin XI tail binding;	-
CsGy6G006230	8.82782	15.7175	1.93811	0.123309	-3.01965	0.008506	0.199357	Chr6	5448754	5451382	-	1548	-	GO:0008810;GO:0030245;	K01179	virNOG02610	G	sp|O64889|GUN12_ARATH Endoglucanase 12 OS=Arabidopsis thaliana GN=At2g44540 PE=3 SV=1	Endoglucanase	GO:0030245//cellulose catabolic process;	-	GO:0008810//cellulase activity;	ko02020(Two-component system);ko00500(Starch and sucrose metabolism)
CsGy4G013180	9.67617	17.0996	2.25269	0.131739	-2.92425	0.00886944	0.205483	Chr4	18317418	18320454	+	1020	-	GO:0006633;GO:0051213;	K00454	virNOG02698	E	sp|O24370|LOX21_SOLTU Linoleate 13S-lipoxygenase 2-1, chloroplastic OS=Solanum tuberosum GN=LOX2.1 PE=1 SV=1	Lipoxygenase	GO:0006633//fatty acid biosynthetic process;	-	GO:0051213//dioxygenase activity;	ko00592(alpha-Linolenic acid metabolism);ko00591(Linoleic acid metabolism)
CsGy2G020430	23.5176	38.6313	8.40388	0.217541	-2.20064	0.00922829	0.2103	Chr2	29381475	29383479	+	1620	-	GO:0016021;	-	virNOG11621	R	sp|Q9FYG4|GLOX1_ARATH Aldehyde oxidase GLOX1 OS=Arabidopsis thaliana GN=GLOX1 PE=2 SV=1	WSC domain-containing protein ARB_07867-like	-	GO:0016021//integral component of membrane;	-	-
CsGy3G030740	12.1286	20.6827	3.57449	0.172826	-2.53261	0.00928067	0.210963	Chr3	30657064	30660479	-	1557	-	-	-	virNOG08538	S	sp|Q9SF32|IQD1_ARATH Protein IQ-DOMAIN 1 OS=Arabidopsis thaliana GN=IQD1 PE=1 SV=1	protein IQ-DOMAIN 1-like isoform X1	-	-	-	-
CsGy1G014190	66.4287	90.269	42.5885	0.471795	-1.08377	0.0101406	0.222239	Chr1	9881824	9884460	+	2637	-	GO:0008270;	-	virNOG01451	R	sp|Q9ZUW3|PP172_ARATH Pentatricopeptide repeat-containing protein At2g27610 OS=Arabidopsis thaliana GN=PCMP-H60 PE=2 SV=1	Pentatricopeptide repeat-containing protein	-	-	GO:0008270//zinc ion binding;	-
CsGy1G014810	336.123	486.605	185.64	0.3815	-1.39024	0.01047	0.227167	Chr1	10722859	10726371	-	1047	-	GO:0016491;GO:0055114;	-	virNOG07625;NOG07759;virNOG00703	QR	sp|Q94KL7|SILD_FORIN Secoisolariciresinol dehydrogenase (Fragment) OS=Forsythia intermedia PE=1 SV=1	TASSELSEED2-like protein	GO:0055114//obsolete oxidation-reduction process;	-	GO:0016491//oxidoreductase activity;	-
CsGy3G023100	62.3697	83.7219	41.0175	0.489926	-1.02937	0.0106145	0.228134	Chr3	22431179	22431580	-	282	-	-	-	-	-	-	Uncharacterized protein	-	-	-	-
CsGy2G007680	320.18	469.213	171.146	0.36475	-1.45502	0.0108646	0.23181	Chr2	6286847	6294141	+	4495	-	GO:0043531;GO:0050896;	K13459	virNOG30351	T	sp|Q9T048|DRL27_ARATH Disease resistance protein At4g27190 OS=Arabidopsis thaliana GN=At4g27190 PE=2 SV=1	disease resistance protein At4g27190-like isoform X1	GO:0050896//response to stimulus;	-	GO:0043531//ADP binding;	ko04626(Plant-pathogen interaction)
CsGy4G004740	1282.76	1747.25	818.27	0.46832	-1.09443	0.0111302	0.234305	Chr4	3341956	3346144	-	1994	-	GO:0008483;GO:0030170;	K00827	virNOG05456	E	sp|Q940M2|AGT21_ARATH Alanine--glyoxylate aminotransferase 2 homolog 1, mitochondrial OS=Arabidopsis thaliana GN=AGT2 PE=1 SV=1	alanine--glyoxylate aminotransferase 2 homolog 1, mitochondrial	-	-	GO:0008483//transaminase activity;GO:0030170//pyridoxal phosphate binding;	ko00280(Valine, leucine and isoleucine degradation);ko00270(Cysteine and methionine metabolism);ko00260(Glycine, serine and threonine metabolism);ko00250(Alanine, aspartate and glutamate metabolism)
CsGy6G031990	20.5404	32.2775	8.80332	0.272738	-1.87441	0.01116	0.234305	Chr6	29424097	29425162	+	477	-	GO:0004568;GO:0005975;GO:0006032;GO:0008061;GO:0016998;	K20547	virNOG01205	G	sp|P08252|CHI1_TOBAC Endochitinase A OS=Nicotiana tabacum GN=CHN48 PE=1 SV=2	endochitinase-like	GO:0005975//carbohydrate metabolic process;GO:0006032//chitin catabolic process;GO:0016998//cell wall macromolecule catabolic process;	-	GO:0004568//chitinase activity;GO:0008061//chitin binding;	ko04016(MAPK signaling pathway - plant);ko00520(Amino sugar and nucleotide sugar metabolism)
CsGy2G026090	41.8489	58.679	25.0188	0.426368	-1.22983	0.0111611	0.234305	Chr2	33661672	33670253	+	1236	-	GO:0016021;GO:0016192;	K08486	virNOG07991	U	sp|Q8VZU2|SY132_ARATH Syntaxin-132 OS=Arabidopsis thaliana GN=SYP132 PE=1 SV=1	syntaxin-132-like isoform X2	GO:0016192//vesicle-mediated transport;	GO:0016021//integral component of membrane;	-	ko04721(Synaptic vesicle cycle);ko04130(SNARE interactions in vesicular transport)
CsGy6G020970	4.13938	8.27877	0	0	-Inf	0.0113755	0.237159	Chr6	21605966	21606486	-	246	-	GO:0004185;GO:0006508;	K16298	virNOG03124	O	sp|P32826|SCP49_ARATH Serine carboxypeptidase-like 49 OS=Arabidopsis thaliana GN=SCPL49 PE=2 SV=2	Carboxypeptidase	GO:0006508//proteolysis;	-	GO:0004185//serine-type carboxypeptidase activity;	-
CsGy4G015470	114.571	177.893	51.2486	0.288087	-1.79542	0.0114579	0.237911	Chr4	20142147	20142705	+	522	-	-	K14496	virNOG05648	R	sp|O80920|PYL4_ARATH Abscisic acid receptor PYL4 OS=Arabidopsis thaliana GN=PYL4 PE=1 SV=1	abscisic acid receptor PYL4	-	-	-	ko04075(Plant hormone signal transduction);ko04016(MAPK signaling pathway - plant)
CsGy2G011690	4.12474	8.24949	0	0	-Inf	0.0114952	0.238282	Chr2	11687490	11688517	+	607	-	-	-	-	-	-	Unknown Protein	-	-	-	-
CsGy3G000900	283.682	501.953	65.4116	0.130314	-2.93993	0.0115565	0.239005	Chr3	655238	659163	+	2336	-	GO:0005887;GO:0015204;GO:0015293;GO:0071918;	-	virNOG12073	P	sp|F4KD71|DUR3_ARATH Urea-proton symporter DUR3 OS=Arabidopsis thaliana GN=DUR3 PE=1 SV=1	urea-proton symporter DUR3	GO:0071918//urea transmembrane transport;	GO:0005887//integral component of plasma membrane;	GO:0015204//urea transmembrane transporter activity;GO:0015293//symporter activity;	-
CsGy7G019380	130.018	174.268	85.7681	0.492163	-1.02279	0.0123094	0.24809	Chr7	21971486	21973202	-	723	-	GO:0005634;GO:0006355;GO:0009734;	K14484	virNOG19800	K	sp|P13088|AUX22_SOYBN Auxin-induced protein AUX22 OS=Glycine max GN=AUX22 PE=2 SV=1	Auxin-responsive protein	GO:0006355//regulation of transcription, DNA-templated;GO:0009734//auxin-activated signaling pathway;	GO:0005634//nucleus;	-	ko04075(Plant hormone signal transduction)
CsGy3G000540	60.4737	89.593	31.3543	0.349964	-1.51472	0.0123102	0.24809	Chr3	397935	400334	-	1104	-	GO:0006511;	K03094	virNOG17546	O	sp|Q39255|SKP1A_ARATH SKP1-like protein 1A OS=Arabidopsis thaliana GN=SKP1A PE=1 SV=1	SKP1-like protein 1B	GO:0006511//ubiquitin-dependent protein catabolic process;	-	-	ko05200(Pathways in cancer);ko05170(Human immunodeficiency virus 1 infection);ko05132(Salmonella infection);ko05131(Shigellosis);ko04710(Circadian rhythm);ko04350(TGF-beta signaling pathway);ko04341(Hedgehog signaling pathway - fly);ko04310(Wnt signaling pathway);ko04141(Protein processing in endoplasmic reticulum);ko04120(Ubiquitin mediated proteolysis);ko04114(Oocyte meiosis);ko04111(Cell cycle…
CsGy1G029140	44.5718	66.6328	22.5108	0.337833	-1.56562	0.0123244	0.24809	Chr1	27184336	27193302	-	2586	-	GO:0003682;GO:0003886;GO:0005634;GO:0006342;GO:0010069;GO:0010425;GO:0051567;GO:0090116;	K00558	virNOG10393	B	sp|Q94F88|CMT3_ARATH DNA (cytosine-5)-methyltransferase CMT3 OS=Arabidopsis thaliana GN=CMT3 PE=1 SV=2	Cytosine-specific methyltransferase	GO:0010069//zygote asymmetric cytokinesis in embryo sac;GO:0010425//DNA methylation on cytosine within a CNG sequence;GO:0051567//histone H3-K9 methylation;GO:0090116//C-5 methylation of cytosine;	GO:0005634//nucleus;	GO:0003682//chromatin binding;GO:0003886//DNA (cytosine-5-)-methyltransferase activity;	ko05206(MicroRNAs in cancer);ko00270(Cysteine and methionine metabolism)
CsGy4G024170	29.0072	42.4855	15.5289	0.36551	-1.45202	0.0127663	0.252772	Chr4	29994476	30001544	+	2826	-	-	K15340	virNOG11840	AL	sp|Q38961|SNM1_ARATH DNA cross-link repair protein SNM1 OS=Arabidopsis thaliana GN=SNM1 PE=2 SV=1	DNA cross-link repair protein SNM1	-	-	-	-
CsGy5G006680	35.4755	51.0547	19.8962	0.389705	-1.35955	0.0128965	0.253601	Chr5	4551936	4556174	-	2038	-	-	-	virNOG20030;virNOG20475	S	-	hypothetical protein (DUF674)	-	-	-	-
CsGy4G007380	350.982	477.817	224.146	0.469105	-1.09202	0.0130671	0.25401	Chr4	5439589	5441104	-	893	-	GO:0004364;	K00799	virNOG16492	O	sp|Q03666|GSTX4_TOBAC Probable glutathione S-transferase OS=Nicotiana tabacum PE=2 SV=1	Glutathione S-transferase	-	-	GO:0004364//glutathione transferase activity;	ko05418(Fluid shear stress and atherosclerosis);ko05225(Hepatocellular carcinoma);ko05208(Chemical carcinogenesis - reactive oxygen species);ko05207(Chemical carcinogenesis - receptor activation);ko05204(Chemical carcinogenesis - DNA adducts);ko05200(Pathways in cancer);ko04212(Longevity regulating pathway - worm);ko01524(Platinum drug resistance);ko00983(Drug metabolism - other enzymes);ko00982(…
CsGy1G010370	68.1285	91.083	45.174	0.495965	-1.01169	0.0132335	0.255871	Chr1	6522103	6524466	-	1306	-	-	-	-	-	-	UBN2_3 domain-containing protein	-	-	-	-
CsGy1G009080	7392.75	10219.9	4565.62	0.446739	-1.1625	0.0133483	0.257483	Chr1	5664963	5667596	-	1960	-	GO:0030570;GO:0045490;GO:0046872;	K01728	virNOG15081	G	sp|Q93Z25|PLY22_ARATH Probable pectate lyase 22 OS=Arabidopsis thaliana GN=At5g63180 PE=2 SV=1	Pectate lyase	GO:0045490//pectin catabolic process;	-	GO:0030570//pectate lyase activity;GO:0046872//metal ion binding;	ko02024(Quorum sensing);ko00040(Pentose and glucuronate interconversions)
CsGy1G024030	13.1306	22.0755	4.18569	0.189608	-2.39891	0.013372	0.257483	Chr1	22801296	22803749	+	928	-	-	-	virNOG05655	S	-	Uncharacterized protein	-	-	-	-
CsGy4G007740	41.4707	58.587	24.3545	0.415698	-1.26639	0.0134353	0.257574	Chr4	5793193	5800454	+	1985	-	-	-	virNOG03051	S	sp|P16273|PRPX_HORVU Pathogen-related protein OS=Hordeum vulgare PE=2 SV=2	pathogen-related protein-like	-	-	-	-
CsGy4G011030	72.2461	103.273	41.2195	0.399133	-1.32506	0.0136963	0.260373	Chr4	10203520	10207710	-	3738	-	GO:0003700;GO:0005634;GO:0006355;GO:0008356;GO:0009630;GO:0009956;GO:0043565;GO:0048366;GO:0051457;GO:0090610;	-	virNOG09991	K	sp|Q9AVK4|SCR_PEA Protein SCARECROW OS=Pisum sativum GN=SCR PE=2 SV=1	protein SCARECROW 1	GO:0006355//regulation of transcription, DNA-templated;GO:0008356//asymmetric cell division;GO:0009630//gravitropism;GO:0009956//radial pattern formation;GO:0048366//leaf development;GO:0051457//maintenance of protein location in nucleus;GO:0090610//bundle sheath cell fate specification;	GO:0005634//nucleus;	GO:0003700//DNA-binding transcription factor activity;GO:0043565//sequence-specific DNA binding;	-
CsGy1G013910	177.557	274.919	80.1953	0.291705	-1.77742	0.0137959	0.26117	Chr1	9565665	9566792	+	1128	-	GO:0003676;	-	KOG1721;virNOG03555	KR	sp|Q0WT24|STOP2_ARATH Protein SENSITIVE TO PROTON RHIZOTOXICITY 2 OS=Arabidopsis thaliana GN=STOP2 PE=2 SV=1	Zinc finger, C2H2	-	-	GO:0003676//nucleic acid binding;	-
CsGy7G004930	127.098	174.933	79.2625	0.453102	-1.14209	0.0144617	0.267349	Chr7	3714221	3723390	-	3010	-	GO:0004674;GO:0005102;GO:0005524;GO:0006468;GO:0007165;GO:0016021;	K13416	virNOG12309	T	sp|Q94F62|BAK1_ARATH BRASSINOSTEROID INSENSITIVE 1-associated receptor kinase 1 OS=Arabidopsis thaliana GN=BAK1 PE=1 SV=2	Somatic embryogenesis receptor kinase 1	GO:0006468//protein phosphorylation;GO:0007165//signal transduction;	GO:0016021//integral component of membrane;	GO:0004674//protein serine/threonine kinase activity;GO:0005102//signaling receptor binding;GO:0005524//ATP binding;	ko04626(Plant-pathogen interaction);ko04075(Plant hormone signal transduction);ko04016(MAPK signaling pathway - plant)
CsGy7G018630	1635.52	2379.06	891.988	0.374934	-1.41529	0.0147787	0.270723	Chr7	21567183	21575005	-	2468	-	-	-	virNOG01029	R	-	Leucine-rich repeat family protein	-	-	-	-
CsGy5G001350	106.028	165.375	46.6808	0.282272	-1.82484	0.015156	0.274033	Chr5	818595	821409	+	1548	-	GO:0016491;GO:0046872;GO:0055114;	-	virNOG03656	Q	sp|Q9ZSA7|DLO2_ARATH Protein DMR6-LIKE OXYGENASE 2 OS=Arabidopsis thaliana GN=DLO2 PE=2 SV=1	1-aminocyclopropane-1-carboxylate oxidase, putative	GO:0055114//obsolete oxidation-reduction process;	-	GO:0016491//oxidoreductase activity;GO:0046872//metal ion binding;	-
CsGy6G017900	44.4381	61.8773	26.9989	0.43633	-1.19651	0.01551	0.278213	Chr6	18721927	18726724	+	2605	-	GO:0004672;GO:0005509;GO:0005524;GO:0006468;GO:0016021;GO:0030247;	-	virNOG01267;NOG128933	T	sp|Q9LMP1|WAK2_ARATH Wall-associated receptor kinase 2 OS=Arabidopsis thaliana GN=WAK2 PE=1 SV=1	wall-associated receptor kinase 2-like	GO:0006468//protein phosphorylation;	GO:0016021//integral component of membrane;	GO:0004672//protein kinase activity;GO:0005509//calcium ion binding;GO:0005524//ATP binding;GO:0030247//polysaccharide binding;	-
CsGy1G025470	74.6712	104.037	45.3053	0.435472	-1.19935	0.0155495	0.27837	Chr1	24387835	24392685	-	480	-	GO:0005516;GO:0006950;	-	-	-	-	Uncharacterized protein	GO:0006950//response to stress;	-	GO:0005516//calmodulin binding;	-
CsGy1G024630	36.5917	51.6653	21.5181	0.41649	-1.26365	0.0156767	0.28037	Chr1	23513379	23514089	+	480	-	GO:0016614;GO:0050660;GO:0055114;	-	virNOG10800;virNOG39050;virNOG39462;virNOG39040	R	sp|Q93ZA3|BBE13_ARATH Berberine bridge enzyme-like 13 OS=Arabidopsis thaliana GN=At1g30760 PE=1 SV=1	Berberine bridge enzyme-like 22	GO:0055114//obsolete oxidation-reduction process;	-	GO:0016614//oxidoreductase activity, acting on CH-OH group of donors;GO:0050660//flavin adenine dinucleotide binding;	-
CsGy2G005660	67.7929	93.0171	42.5687	0.457643	-1.1277	0.0159719	0.282582	Chr2	3955361	3955675	+	315	-	GO:0046983;	-	-	-	-	transcription factor	-	-	GO:0046983//protein dimerization activity;	-
CsGy3G025850	330.903	469.674	192.131	0.409074	-1.28957	0.0161119	0.284047	Chr3	26543742	26548956	-	2253	-	GO:0008152;GO:0016758;	K13691	virNOG01783	CG	sp|Q6VAA6|U74G1_STERE UDP-glycosyltransferase 74G1 OS=Stevia rebaudiana GN=UGT74G1 PE=1 SV=1	Glycosyltransferase	GO:0008152//metabolic process;	-	GO:0016758//hexosyltransferase activity;	-
CsGy7G010090	476.759	677.471	276.046	0.407466	-1.29525	0.0166964	0.288634	Chr7	12748179	12749951	-	1535	-	GO:0003677;GO:0005634;GO:0006355;	-	virNOG04155;virNOG03048	KR	sp|Q9SK55|NAC42_ARATH Transcription factor JUNGBRUNNEN 1 OS=Arabidopsis thaliana GN=JUB1 PE=1 SV=1	NAC domain-containing protein, putative	GO:0006355//regulation of transcription, DNA-templated;	GO:0005634//nucleus;	GO:0003677//DNA binding;	-
CsGy6G013350	92.7482	140.66	44.8362	0.318756	-1.64948	0.017002	0.291017	Chr6	11789348	11797853	+	845	-	GO:0000977;GO:0003700;GO:0005634;GO:0045944;GO:0046983;	K09264	virNOG12936;virNOG04525	K	sp|P29381|AGL1_ARATH Agamous-like MADS-box protein AGL1 OS=Arabidopsis thaliana GN=AGL1 PE=1 SV=1	MADS-box transcription factor 3	GO:0045944//positive regulation of transcription by RNA polymerase II;	GO:0005634//nucleus;	GO:0000977//RNA polymerase II transcription regulatory region sequence-specific DNA binding;GO:0003700//DNA-binding transcription factor activity;GO:0046983//protein dimerization activity;	-
CsGy5G010780	559.015	786.716	331.314	0.421136	-1.24764	0.017054	0.291204	Chr5	11382331	11385763	-	2546	-	-	K12116	virNOG01065	R	sp|Q9C9W9|ADO3_ARATH Adagio protein 3 OS=Arabidopsis thaliana GN=ADO3 PE=1 SV=1	Putative LOV domain-containing protein	-	-	-	ko04712(Circadian rhythm - plant)
CsGy5G008430	110.54	167.402	53.6789	0.320659	-1.64089	0.0172392	0.29324	Chr5	6394967	6395698	-	732	-	GO:0016020;	K14496	virNOG05648	R	sp|O80920|PYL4_ARATH Abscisic acid receptor PYL4 OS=Arabidopsis thaliana GN=PYL4 PE=1 SV=1	abscisic acid receptor PYL4	-	GO:0016020//membrane;	-	ko04075(Plant hormone signal transduction);ko04016(MAPK signaling pathway - plant)
CsGy6G007320	25.6252	37.3748	13.8755	0.371252	-1.42953	0.0175282	0.296229	Chr6	6210928	6212015	+	612	-	-	-	virNOG07577	R	sp|Q67YC9|Y4141_ARATH Uncharacterized protein At4g14100 OS=Arabidopsis thaliana GN=At4g14100 PE=2 SV=1	Glycosyl transferase	-	-	-	-
CsGy1G012870	101.154	164.947	37.3615	0.226506	-2.14238	0.0175969	0.297113	Chr1	8284174	8293995	+	2074	-	GO:0005516;GO:0006952;GO:0009607;GO:0016021;	K08472	virNOG12204	S	sp|Q94KB9|MLO3_ARATH MLO-like protein 3 OS=Arabidopsis thaliana GN=MLO3 PE=2 SV=1	MLO-like protein	GO:0006952//defense response;GO:0009607//response to biotic stimulus;	GO:0016021//integral component of membrane;	GO:0005516//calmodulin binding;	-
CsGy5G009220	15.7236	24.5501	6.897	0.280936	-1.83169	0.017704	0.29726	Chr5	7428523	7432396	-	1200	-	GO:0003677;GO:0005634;GO:0006355;	-	virNOG24690;virNOG22712	K	sp|Q700D9|MYBF_ARATH Putative Myb family transcription factor At1g14600 OS=Arabidopsis thaliana GN=At1g14600 PE=2 SV=2	putative Myb family transcription factor At1g14600	GO:0006355//regulation of transcription, DNA-templated;	GO:0005634//nucleus;	GO:0003677//DNA binding;	-
CsGy1G029150	39.8849	56.3301	23.4397	0.416114	-1.26495	0.0179318	0.298702	Chr1	27196260	27200307	-	2152	-	GO:0008324;GO:0016021;GO:0098655;	-	virNOG01673	P	sp|Q10PP8|MTP4_ORYSJ Metal tolerance protein 4 OS=Oryza sativa subsp. japonica GN=MTP4 PE=2 SV=1	Cation efflux protein	GO:0098655//cation transmembrane transport;	GO:0016021//integral component of membrane;	GO:0008324//cation transmembrane transporter activity;	-
CsGy4G001660	8.53286	14.8902	2.17555	0.146107	-2.77491	0.0180504	0.299666	Chr4	975174	977899	-	1699	-	GO:0016301;GO:0016310;	-	virNOG12133	C	sp|Q9XI37|PV42A_ARATH SNF1-related protein kinase regulatory subunit gamma-like PV42a OS=Arabidopsis thaliana GN=PV42A PE=2 SV=1	SNF1-related protein kinase regulatory subunit gamma-like PV42a	GO:0016310//phosphorylation;	-	GO:0016301//kinase activity;	-
CsGy7G020550	380.974	519.29	242.659	0.467289	-1.09761	0.0180623	0.299666	Chr7	22883036	22885315	+	732	-	-	-	virNOG16242;virNOG14504	O	sp|Q8NHS0|DNJB8_HUMAN DnaJ homolog subfamily B member 8 OS=Homo sapiens GN=DNAJB8 PE=1 SV=1	Chaperone DnaJ	-	-	-	-
CsGy4G023190	12.3994	20.3037	4.49515	0.221396	-2.1753	0.0183908	0.302073	Chr4	29322438	29335883	-	3262	-	GO:0004185;GO:0006508;	K16296	virNOG14733;virNOG14564	O	sp|Q9CAU3|SCP2_ARATH Serine carboxypeptidase-like 2 OS=Arabidopsis thaliana GN=SCPL2 PE=2 SV=1	Serine carboxypeptidase-like 7	GO:0006508//proteolysis;	-	GO:0004185//serine-type carboxypeptidase activity;	-
CsGy1G013630	74.5921	131.005	18.1787	0.138763	-2.8493	0.0186487	0.30349	Chr1	9171300	9174504	+	1087	-	GO:0004089;GO:0006730;GO:0008270;	K01674	virNOG00515	R	sp|Q8L817|ATCA7_ARATH Alpha carbonic anhydrase 7 OS=Arabidopsis thaliana GN=ACA7 PE=2 SV=1	alpha carbonic anhydrase 7-like	GO:0006730//one-carbon metabolic process;	-	GO:0004089//carbonate dehydratase activity;GO:0008270//zinc ion binding;	ko00910(Nitrogen metabolism)
CsGy4G021490	3.63407	7.26814	0	0	-Inf	0.0187269	0.303738	Chr4	28153927	28157098	+	2520	-	GO:0004970;GO:0006811;GO:0016021;GO:0035235;	K05387	virNOG04188	TPE	sp|Q9C5V5|GLR28_ARATH Glutamate receptor 2.8 OS=Arabidopsis thaliana GN=GLR2.8 PE=2 SV=2	Glutamate receptor	GO:0006811//ion transport;GO:0035235//ionotropic glutamate receptor signaling pathway;	GO:0016021//integral component of membrane;	GO:0004970//ionotropic glutamate receptor activity;	-
CsGy6G005740	41.0489	61.1636	20.9343	0.342267	-1.54681	0.0190076	0.30665	Chr6	5160208	5161793	-	1143	-	GO:0009055;GO:0022900;	-	virNOG20901;NOG146463	SR	-	cucumber peeling cupredoxin-like	GO:0022900//electron transport chain;	-	GO:0009055//electron transfer activity;	-
CsGy5G028010	15.8914	24.873	6.90985	0.277805	-1.84785	0.0194486	0.311524	Chr5	31725264	31732627	-	1949	-	GO:0008152;GO:0016758;	-	virNOG12116	CG	sp|Q9ZVX4|U90A1_ARATH UDP-glycosyltransferase 90A1 OS=Arabidopsis thaliana GN=UGT90A1 PE=2 SV=1	Glycosyltransferase	GO:0008152//metabolic process;	-	GO:0016758//hexosyltransferase activity;	-
CsGy3G017020	15.7466	24.5962	6.897	0.280409	-1.83439	0.0195738	0.312604	Chr3	13049374	13054020	+	2606	-	GO:0016021;GO:0016740;	-	virNOG31007;virNOG05073	SR	sp|Q5E9Q1|PGLT1_BOVIN Protein O-glucosyltransferase 1 OS=Bos taurus GN=POGLUT1 PE=2 SV=1	O-glucosyltransferase rumi homolog	-	GO:0016021//integral component of membrane;	GO:0016740//transferase activity;	-
CsGy5G021710	7.91554	13.8964	1.93471	0.139224	-2.84452	0.0196356	0.312975	Chr5	27394433	27395458	+	1026	-	GO:0003677;GO:0003700;GO:0005634;GO:0006355;	-	virNOG20995	K	sp|Q9FYK5|ESR2_ARATH Ethylene-responsive transcription factor ESR2 OS=Arabidopsis thaliana GN=ESR2 PE=1 SV=1	ethylene-responsive transcription factor ESR2-like	GO:0006355//regulation of transcription, DNA-templated;	GO:0005634//nucleus;	GO:0003677//DNA binding;GO:0003700//DNA-binding transcription factor activity;	-
CsGy2G004040	320.571	464.766	176.377	0.379495	-1.39785	0.0196656	0.312975	Chr2	2726558	2735485	-	4745	-	GO:0007165;GO:0043531;	-	virNOG13489;virNOG10093;NOG96741	TR	sp|Q40392|TMVRN_NICGU TMV resistance protein N OS=Nicotiana glutinosa GN=N PE=1 SV=1	TIR-NBS-LRR-AAA+ATPase class resistance protein	GO:0007165//signal transduction;	-	GO:0043531//ADP binding;	-
CsGy1G025710	1896.36	2686.37	1106.35	0.411837	-1.27986	0.0197604	0.314035	Chr1	24534229	24537169	+	1469	-	-	-	virNOG19725	S	sp|F4HV65|DRMH4_ARATH Dormancy-associated protein homolog 4 OS=Arabidopsis thaliana GN=At1g54070 PE=3 SV=1	Dormancy/auxin associated family protein	-	-	-	-
CsGy7G017800	56.3316	94.5688	18.0944	0.191336	-2.38582	0.0197831	0.31412	Chr7	21003646	21005966	-	2234	-	-	-	virNOG24728	R	-	protein LIM1-like	-	-	-	-
CsGy3G019750	50.2622	68.5048	32.0196	0.467406	-1.09725	0.0200013	0.316475	Chr3	15910116	15915145	+	1717	-	GO:0005509;	K06268	virNOG06998	T	sp|O81223|CNBL4_ARATH Calcineurin B-like protein 4 OS=Arabidopsis thaliana GN=CBL4 PE=1 SV=3	Calcineurin B-like protein 4-1	-	-	GO:0005509//calcium ion binding;	ko05417(Lipid and atherosclerosis);ko05235(PD-L1 expression and PD-1 checkpoint pathway in cancer);ko05170(Human immunodeficiency virus 1 infection);ko05167(Kaposi sarcoma-associated herpesvirus infection);ko05166(Human T-cell leukemia virus 1 infection);ko05163(Human cytomegalovirus infection);ko05152(Tuberculosis);ko05031(Amphetamine addiction);ko05022(Pathways of neurodegeneration - multiple d…
CsGy5G019150	37.5581	53.3041	21.8122	0.409203	-1.28911	0.0202209	0.318835	Chr5	25583684	25586041	-	380	-	-	-	-	-	-	Unknown Protein	-	-	-	-
CsGy3G012490	27.9222	40.3155	15.5289	0.385184	-1.37638	0.0206411	0.322728	Chr3	9414648	9416063	-	1416	-	-	-	virNOG24092;virNOG23551	R	sp|O23305|Y4449_ARATH FHA domain-containing protein At4g14490 OS=Arabidopsis thaliana GN=At4g14490 PE=1 SV=1	FHA domain-containing protein At4g14490-like	-	-	-	-
CsGy2G018630	52.1763	90.816	13.5367	0.149056	-2.74607	0.0209552	0.324206	Chr2	28259944	28263625	+	3024	-	GO:0005634;	K06627	virNOG03428	D	sp|Q9C6A9|CCA32_ARATH Cyclin-A3-2 OS=Arabidopsis thaliana GN=CYCA3-2 PE=2 SV=1	cyclin-A3-2-like	-	GO:0005634//nucleus;	-	ko05221(Acute myeloid leukemia);ko05203(Viral carcinogenesis);ko05202(Transcriptional misregulation in cancer);ko05200(Pathways in cancer);ko05169(Epstein-Barr virus infection);ko05166(Human T-cell leukemia virus 1 infection);ko05165(Human papillomavirus infection);ko05161(Hepatitis B);ko04914(Progesterone-mediated oocyte maturation);ko04218(Cellular senescence);ko04152(AMPK signaling pathway);ko…
CsGy1G013400	3.53871	7.07741	0	0	-Inf	0.0214281	0.328438	Chr1	8771489	8775647	-	1337	-	-	-	-	-	-	Uncharacterized protein	-	-	-	-
CsGy1G025440	119.937	180.236	59.6368	0.330881	-1.59562	0.0216036	0.329112	Chr1	24358962	24363832	-	1916	-	GO:0005516;GO:0006950;	-	virNOG02451	S	sp|C0SV51|CB60C_ARATH Calmodulin-binding protein 60 C OS=Arabidopsis thaliana GN=CBP60C PE=2 SV=1	calmodulin-binding protein 60 C-like isoform X2	GO:0006950//response to stress;	-	GO:0005516//calmodulin binding;	-
CsGy2G000490	23.9485	35.3109	12.5862	0.356438	-1.48828	0.0218405	0.3306	Chr2	316101	317922	-	1477	-	GO:0046872;GO:0051213;GO:0055114;	K05933	virNOG00601	Q	sp|Q9ZUN4|ACCO1_ARATH 1-aminocyclopropane-1-carboxylate oxidase 1 OS=Arabidopsis thaliana GN=ACO1 PE=2 SV=1	1-aminocyclopropane-1-carboxylate oxidase 1	GO:0055114//obsolete oxidation-reduction process;	-	GO:0046872//metal ion binding;GO:0051213//dioxygenase activity;	ko00270(Cysteine and methionine metabolism)
CsGy5G026970	4.57696	8.76732	0.3866	0.0440956	-4.50322	0.0234717	0.342347	Chr5	30697671	30700469	+	2240	-	GO:0005509;GO:0005544;GO:0006950;GO:0009628;	K17099	virNOG01000	U	sp|Q9ZVJ6|ANXD4_ARATH Annexin D4 OS=Arabidopsis thaliana GN=ANN4 PE=1 SV=1	annexin D4-like	GO:0006950//response to stress;GO:0009628//response to abiotic stimulus;	-	GO:0005509//calcium ion binding;GO:0005544//calcium-dependent phospholipid binding;	-
CsGy5G016700	29.6228	42.5064	16.7391	0.393803	-1.34445	0.024361	0.345635	Chr5	23081576	23082662	-	969	-	-	-	virNOG25148	S	-	Uncharacterized protein	-	-	-	-
CsGy7G000130	32.0873	46.0058	18.1689	0.394926	-1.34034	0.0247793	0.349839	Chr7	192496	195883	+	1243	-	-	-	virNOG12758	R	sp|E1U332|ALL12_OLEEU Isoflavone reductase-like protein OS=Olea europaea PE=1 SV=1	isoflavone reductase-like protein	-	-	-	-
CsGy1G016880	461.471	703.042	219.899	0.312783	-1.67677	0.0252448	0.351733	Chr1	14201974	14206602	-	2115	-	GO:0008643;GO:0016021;GO:0022857;GO:0055085;	-	NOG122331;virNOG03759	RG	sp|Q8GW61|STP14_ARATH Sugar transport protein 14 OS=Arabidopsis thaliana GN=STP14 PE=2 SV=2	Sugar transporter, putative	GO:0008643//carbohydrate transport;GO:0055085//transmembrane transport;	GO:0016021//integral component of membrane;	GO:0022857//transmembrane transporter activity;	-
CsGy2G011320	58.7661	97.2123	20.3199	0.209026	-2.25825	0.0257272	0.354233	Chr2	11181541	11184048	+	1243	-	GO:0000786;GO:0000790;GO:0003677;GO:0006342;GO:0046982;	K11251	COG5262;virNOG19311;virNOG20208	B	sp|O23628|H2AV1_ARATH Histone H2A variant 1 OS=Arabidopsis thaliana GN=H2AV PE=1 SV=1	Histone H2A	-	GO:0000786//nucleosome;	GO:0003677//DNA binding;GO:0046982//protein heterodimerization activity;	ko05322(Systemic lupus erythematosus);ko05034(Alcoholism);ko04613(Neutrophil extracellular trap formation);ko04217(Necroptosis)
CsGy5G019950	1051.44	1424.87	678.01	0.47584	-1.07145	0.0258988	0.354308	Chr5	26209756	26214261	+	1965	-	GO:0005975;GO:0009505;GO:0009620;GO:0009911;GO:0009965;GO:0048046;GO:0052692;	K07407	virNOG06615	G	sp|Q8RX86|AGAL2_ARATH Alpha-galactosidase 2 OS=Arabidopsis thaliana GN=AGAL2 PE=1 SV=1	Alpha-galactosidase	GO:0005975//carbohydrate metabolic process;GO:0009620//response to fungus;GO:0009911//positive regulation of flower development;GO:0009965//leaf morphogenesis;	GO:0009505//plant-type cell wall;GO:0048046//apoplast;	GO:0052692//raffinose alpha-galactosidase activity;	ko00603(Glycosphingolipid biosynthesis - globo and isoglobo series);ko00600(Sphingolipid metabolism);ko00561(Glycerolipid metabolism);ko00052(Galactose metabolism)
CsGy6G014560	31.0233	51.474	10.5726	0.205397	-2.28351	0.0259126	0.354308	Chr6	12780945	12782356	+	441	-	GO:0000786;GO:0003677;GO:0005634;GO:0006334;GO:0046982;	K11254	virNOG19486;COG2036	B	sp|P62785|H41_WHEAT Histone H4 variant TH011 OS=Triticum aestivum PE=3 SV=2	Histone H4	GO:0006334//nucleosome assembly;	GO:0000786//nucleosome;GO:0005634//nucleus;	GO:0003677//DNA binding;GO:0046982//protein heterodimerization activity;	ko05322(Systemic lupus erythematosus);ko05203(Viral carcinogenesis);ko05034(Alcoholism);ko04613(Neutrophil extracellular trap formation)
CsGy6G023680	64.0295	95.6521	32.407	0.3388	-1.56149	0.0261443	0.355865	Chr6	23755655	23758344	+	1933	-	GO:0004674;GO:0005524;GO:0006468;	-	virNOG11792	T	sp|Q93YN1|CRPK1_ARATH Cold-responsive protein kinase 1 OS=Arabidopsis thaliana GN=CRPK1 PE=1 SV=1	putative serine/threonine-protein kinase	GO:0006468//protein phosphorylation;	-	GO:0004674//protein serine/threonine kinase activity;GO:0005524//ATP binding;	-
CsGy6G017100	11.8657	19.3751	4.35621	0.224835	-2.15306	0.0262143	0.356282	Chr6	17620318	17627803	+	333	-	GO:0007076;	K11491	virNOG06119	S	-	condensin-2 complex subunit D3	GO:0007076//mitotic chromosome condensation;	-	-	-
CsGy3G030440	47.2062	77.5996	16.8129	0.216662	-2.20648	0.0266307	0.360858	Chr3	30473811	30477935	+	2925	-	GO:0005524;GO:0005886;GO:0015416;GO:0015716;GO:0015748;GO:0016021;GO:0055085;	-	virNOG11121	Q	sp|Q9LFG8|AB20G_ARATH ABC transporter G family member 20 OS=Arabidopsis thaliana GN=ABCG20 PE=2 SV=1	ABC transporter G family member 20	GO:0015716//organic phosphonate transport;GO:0015748//organophosphate ester transport;GO:0055085//transmembrane transport;	GO:0005886//plasma membrane;GO:0016021//integral component of membrane;	GO:0005524//ATP binding;GO:0015416//ABC-type phosphonate transporter activity;	-
CsGy3G003470	30.8073	44.2958	17.3188	0.39098	-1.35483	0.0268565	0.362378	Chr3	2778974	2795297	+	3998	-	-	-	virNOG00664	S	-	DNA topoisomerase 4 subunit B (DUF810)	-	-	-	-
CsGy4G023480	8.65034	14.8877	2.41299	0.16208	-2.62523	0.0272315	0.364841	Chr4	29573056	29575025	-	1545	-	GO:0004722;GO:0006470;GO:0046872;	-	virNOG06630	T	sp|Q9XGZ9|P2C72_ARATH Probable protein phosphatase 2C 72 OS=Arabidopsis thaliana GN=At5g26010 PE=2 SV=2	probable protein phosphatase 2C 72	GO:0006470//protein dephosphorylation;	-	GO:0004722//protein serine/threonine phosphatase activity;GO:0046872//metal ion binding;	-
CsGy1G028650	44.4777	59.4696	29.4858	0.495813	-1.01213	0.0276624	0.367597	Chr1	26768005	26774056	+	1646	-	GO:0010277;GO:0016021;GO:0051537;GO:0055114;	-	virNOG09968	R	sp|Q8W496|PTC52_ARATH Protochlorophyllide-dependent translocon component 52, chloroplastic OS=Arabidopsis thaliana GN=PTC52 PE=2 SV=1	protochlorophyllide-dependent translocon component 52, chloroplastic-like	GO:0055114//obsolete oxidation-reduction process;	GO:0016021//integral component of membrane;	GO:0010277//chlorophyllide a oxygenase [overall] activity;GO:0051537//2 iron, 2 sulfur cluster binding;	-
CsGy6G011020	123.395	166.422	80.3677	0.482915	-1.05016	0.0279681	0.369313	Chr6	9463089	9466567	-	138	-	-	-	-	-	-	Unknown Protein	-	-	-	-
CsGy2G004210	1007.39	1659.27	355.504	0.214253	-2.22261	0.0282881	0.372261	Chr2	2887615	2891547	-	1110	-	GO:0016702;GO:0031408;GO:0046872;GO:0055114;	K15718	virNOG04223	S	sp|Q43190|LOX14_SOLTU Probable linoleate 9S-lipoxygenase 4 OS=Solanum tuberosum GN=LOX1.4 PE=2 SV=1	Lipoxygenase	GO:0031408//oxylipin biosynthetic process;GO:0055114//obsolete oxidation-reduction process;	-	GO:0016702//oxidoreductase activity, acting on single donors with incorporation of molecular oxygen, incorporation of two atoms of oxygen;GO:0046872//metal ion binding;	ko00591(Linoleic acid metabolism)
CsGy4G015080	29.763	41.4615	18.0646	0.435695	-1.19861	0.028294	0.372261	Chr4	19802600	19807070	+	1490	-	GO:0046872;	-	virNOG23693;virNOG19758	R	sp|P59234|YIPL_SOLTU Protein yippee-like OS=Solanum tuberosum PE=2 SV=1	Protein yippee-like	-	-	GO:0046872//metal ion binding;	-
CsGy6G035260	12.1101	19.1944	5.0258	0.261838	-1.93326	0.029042	0.3767	Chr6	31144048	31147511	-	1458	-	GO:0008168;GO:0016491;GO:0032259;GO:0046872;GO:0055114;	-	virNOG10364	Q	sp|D4N502|DIOX3_PAPSO Codeine O-demethylase OS=Papaver somniferum GN=CODM PE=1 SV=1	senescence-related gene 1	GO:0032259//methylation;GO:0055114//obsolete oxidation-reduction process;	-	GO:0008168//methyltransferase activity;GO:0016491//oxidoreductase activity;GO:0046872//metal ion binding;	-
CsGy3G024490	42.9019	58.2708	27.5329	0.4725	-1.08161	0.0294134	0.37715	Chr3	24549316	24554807	-	1686	-	GO:0016021;	K15102	virNOG01598	C	sp|Q9FMU6|MPCP3_ARATH Mitochondrial phosphate carrier protein 3, mitochondrial OS=Arabidopsis thaliana GN=MPT3 PE=1 SV=1	mitochondrial phosphate carrier protein 3, mitochondrial	-	GO:0016021//integral component of membrane;	-	-
CsGy6G035210	35.6319	65.4401	5.82378	0.088994	-3.49015	0.0294151	0.37715	Chr6	31108720	31115393	+	1388	-	GO:0000977;GO:0003700;GO:0004672;GO:0005524;GO:0005634;GO:0006468;GO:0045944;GO:0046983;	K09264	virNOG04525	K	sp|Q40872|AG_PANGI Floral homeotic protein AGAMOUS OS=Panax ginseng GN=AG2 PE=2 SV=1	MADS-box transcription factor 3	GO:0006468//protein phosphorylation;GO:0045944//positive regulation of transcription by RNA polymerase II;	GO:0005634//nucleus;	GO:0000977//RNA polymerase II transcription regulatory region sequence-specific DNA binding;GO:0003700//DNA-binding transcription factor activity;GO:0004672//protein kinase activity;GO:0005524//ATP binding;GO:0046983//protein dimerization activity;	-
CsGy2G023680	11.8454	19.043	4.64772	0.244064	-2.03467	0.0295089	0.377818	Chr2	31585648	31586961	-	315	-	-	-	-	-	-	Unknown Protein	-	-	-	-
CsGy6G028110	9.66237	15.9911	3.33365	0.208469	-2.26209	0.0298277	0.380097	Chr6	27092989	27094023	-	1035	-	GO:0016301;GO:0016310;	-	virNOG24141	S	-	probable membrane-associated kinase regulator 1	GO:0016310//phosphorylation;	-	GO:0016301//kinase activity;	-
CsGy5G007430	4.3783	8.36829	0.388304	0.0464018	-4.42967	0.030028	0.380964	Chr5	5166155	5172291	+	1455	-	GO:0004252;GO:0006508;	-	COG1404;virNOG01263	O	sp|Q39547|CUCM1_CUCME Cucumisin OS=Cucumis melo PE=1 SV=1	subtilase family protein	GO:0006508//proteolysis;	-	GO:0004252//serine-type endopeptidase activity;	-
CsGy1G029900	80.885	126.561	35.2091	0.278198	-1.84581	0.0302607	0.382577	Chr1	28005150	28007694	+	1501	-	GO:0004553;GO:0005975;	-	virNOG04186	R	sp|P52408|E13B_PRUPE Glucan endo-1,3-beta-glucosidase, basic isoform OS=Prunus persica GN=GNS1 PE=3 SV=1	glucan endo-1,3-beta-glucosidase-like	GO:0005975//carbohydrate metabolic process;	-	GO:0004553//hydrolase activity, hydrolyzing O-glycosyl compounds;	-
CsGy1G014900	40.5602	55.8231	25.2973	0.453169	-1.14188	0.0309403	0.386331	Chr1	10806707	10808284	+	1380	-	GO:0008270;GO:0016021;	-	virNOG07321	R	sp|Q9MA50|PPR13_ARATH Pentatricopeptide repeat-containing protein At1g05750, chloroplastic OS=Arabidopsis thaliana GN=PDE247 PE=2 SV=1	Pentatricopeptide repeat	-	GO:0016021//integral component of membrane;	GO:0008270//zinc ion binding;	-
CsGy3G012520	38.2233	59.7485	16.698	0.279471	-1.83923	0.0309481	0.386331	Chr3	9428118	9428770	-	365	-	GO:0004867;GO:0009611;GO:0010951;	-	virNOG25712;virNOG26866;virNOG27318	SR	sp|P19873|ITH5_CUCMA Inhibitor of trypsin and hageman factor OS=Cucurbita maxima PE=1 SV=1	Proteinase inhibitor, putative	GO:0009611//response to wounding;GO:0010951//negative regulation of endopeptidase activity;	-	GO:0004867//serine-type endopeptidase inhibitor activity;	-
CsGy3G022550	36.6386	50.0389	23.2384	0.464407	-1.10654	0.0309488	0.386331	Chr3	21043829	21046156	-	2328	-	-	-	virNOG15785;virNOG06009	S	sp|Q9LNG5|PPP7L_ARATH Serine/threonine-protein phosphatase 7 long form homolog OS=Arabidopsis thaliana GN=MAIL3 PE=2 SV=1	aminotransferase-like%2C mobile domain protein	-	-	-	-
CsGy7G007390	27.9019	39.6947	16.1091	0.405825	-1.30107	0.0311442	0.38673	Chr7	5342953	5345358	-	2406	-	GO:0008270;	-	virNOG01588	R	sp|Q9FWA6|PP207_ARATH Pentatricopeptide repeat-containing protein At3g02330, mitochondrial OS=Arabidopsis thaliana GN=PCMP-E90 PE=2 SV=2	Pentatricopeptide repeat	-	-	GO:0008270//zinc ion binding;	-
CsGy1G018920	9.74967	17.0109	2.48842	0.146284	-2.77316	0.0321466	0.391398	Chr1	17218475	17222814	-	1083	-	GO:0003735;GO:0005840;GO:0006412;	K02889	virNOG00086;COG2139	J	sp|Q43291|RL211_ARATH 60S ribosomal protein L21-1 OS=Arabidopsis thaliana GN=RPL21A PE=2 SV=2	60S ribosomal protein L21-1	GO:0006412//translation;	GO:0005840//ribosome;	GO:0003735//structural constituent of ribosome;	ko05171(Coronavirus disease - COVID-19);ko03010(Ribosome)
CsGy3G014620	24.8213	36.1016	13.541	0.375081	-1.41472	0.032403	0.392369	Chr3	10775687	10778717	+	1563	-	GO:0006950;GO:0016787;	-	virNOG17399	S	sp|Q8VYN9|PHO32_ARATH Universal stress protein PHOS32 OS=Arabidopsis thaliana GN=PHOS32 PE=1 SV=1	Putative universal stress protein A-like	GO:0006950//response to stress;	-	GO:0016787//hydrolase activity;	-
CsGy3G028800	92.1808	132.197	52.1645	0.394596	-1.34155	0.0326016	0.393277	Chr3	29596581	29599002	+	2040	-	GO:0004672;GO:0005524;GO:0006468;GO:0016021;GO:0030246;	-	virNOG04130	T	sp|O80939|LRK41_ARATH L-type lectin-domain containing receptor kinase IV.1 OS=Arabidopsis thaliana GN=LECRK41 PE=2 SV=1	probable L-type lectin-domain containing receptor kinase VI.1	GO:0006468//protein phosphorylation;	GO:0016021//integral component of membrane;	GO:0004672//protein kinase activity;GO:0005524//ATP binding;GO:0030246//carbohydrate binding;	-
CsGy4G002960	7.87648	14.2786	1.47438	0.103258	-3.27568	0.0326265	0.393277	Chr4	1889007	1889195	+	189	-	-	-	virNOG25339	S	-	Uncharacterized protein	-	-	-	-
CsGy5G007930	153.418	233.79	73.0452	0.31244	-1.67835	0.0328104	0.394181	Chr5	5701882	5702271	+	390	-	GO:0005634;GO:0009649;GO:0009909;GO:0010017;GO:0010114;GO:0042753;GO:0042803;GO:0048573;GO:0080167;	-	euNOG19269;virNOG23137	R	sp|O04211|ELF4_ARATH Protein EARLY FLOWERING 4 OS=Arabidopsis thaliana GN=ELF4 PE=1 SV=1	protein EARLY FLOWERING 4-like	GO:0009649//entrainment of circadian clock;GO:0009909//regulation of flower development;GO:0010017//red or far-red light signaling pathway;GO:0010114//response to red light;GO:0042753//positive regulation of circadian rhythm;GO:0048573//photoperiodism, flowering;GO:0080167//response to karrikin;	GO:0005634//nucleus;	GO:0042803//protein homodimerization activity;	-
CsGy6G034590	52.5192	74.1314	30.9069	0.41692	-1.26216	0.0340515	0.401975	Chr6	30790477	30791004	+	528	-	GO:0003677;GO:0003700;GO:0005634;GO:0006355;	-	virNOG22226	K	sp|O04681|PTI5_SOLLC Pathogenesis-related genes transcriptional activator PTI5 OS=Solanum lycopersicum GN=PTI5 PE=2 SV=1	Ethylene-responsive transcription factor, putative	GO:0006355//regulation of transcription, DNA-templated;	GO:0005634//nucleus;	GO:0003677//DNA binding;GO:0003700//DNA-binding transcription factor activity;	-
CsGy4G017560	161.63	241.472	81.7889	0.33871	-1.56188	0.0348209	0.408317	Chr4	22673270	22679635	-	2308	-	GO:0004672;GO:0005524;GO:0006468;GO:0016021;	-	virNOG04329	T	sp|Q8VYG0|LRL13_ARATH LEAF RUST 10 DISEASE-RESISTANCE LOCUS RECEPTOR-LIKE PROTEIN KINASE-like 1.3 OS=Arabidopsis thaliana GN=LRK10L-1.3 PE=2 SV=1	LOW QUALITY PROTEIN: LEAF RUST 10 DISEASE-RESISTANCE LOCUS RECEPTOR-LIKE PROTEIN KINASE-like 1.4	GO:0006468//protein phosphorylation;	GO:0016021//integral component of membrane;	GO:0004672//protein kinase activity;GO:0005524//ATP binding;	-
CsGy5G020800	263.656	367.609	159.704	0.434439	-1.20277	0.0353779	0.411539	Chr5	26731168	26736921	-	2841	-	GO:0016021;	-	virNOG06829	S	sp|Q5H8A6|CASTO_LOTJA Ion channel CASTOR OS=Lotus japonicus GN=CASTOR PE=1 SV=1	Ion channel CASTOR	-	GO:0016021//integral component of membrane;	-	-
CsGy6G018070	1028.43	1462.87	593.984	0.406039	-1.30031	0.0355585	0.412028	Chr6	18875638	18877639	+	1136	-	GO:0004674;GO:0005524;GO:0006468;	-	virNOG12702	T	sp|Q9SII6|PIX13_ARATH Probable serine/threonine-protein kinase PIX13 OS=Arabidopsis thaliana GN=PIX13 PE=1 SV=2	Kinase superfamily protein	GO:0006468//protein phosphorylation;	-	GO:0004674//protein serine/threonine kinase activity;GO:0005524//ATP binding;	-
CsGy5G012090	16.3729	24.6171	8.12883	0.330211	-1.59854	0.035775	0.412312	Chr5	14384791	14385251	+	198	-	GO:0005525;	-	virNOG06749	R	sp|Q9T0F3|IAN12_ARATH Immune-associated nucleotide-binding protein 12 OS=Arabidopsis thaliana GN=IAN12 PE=2 SV=1	Immune-associated nucleotide-binding protein 12	-	-	GO:0005525//GTP binding;	-
CsGy4G014670	20.8758	30.4906	11.2609	0.369325	-1.43704	0.0359101	0.412806	Chr4	19456637	19461042	-	570	-	-	K00799	-	-	-	Unknown Protein	-	-	-	ko05418(Fluid shear stress and atherosclerosis);ko05225(Hepatocellular carcinoma);ko05208(Chemical carcinogenesis - reactive oxygen species);ko05207(Chemical carcinogenesis - receptor activation);ko05204(Chemical carcinogenesis - DNA adducts);ko05200(Pathways in cancer);ko04212(Longevity regulating pathway - worm);ko01524(Platinum drug resistance);ko00983(Drug metabolism - other enzymes);ko00982(…
CsGy3G016120	14.1556	22.094	6.21719	0.281397	-1.82932	0.0359533	0.413041	Chr3	11971832	11972989	-	453	-	GO:0003723;GO:0004519;GO:0009451;GO:0043231;GO:0090305;	K13800	virNOG08843;virNOG12387	FR	sp|Q9SB36|PP337_ARATH Pentatricopeptide repeat-containing protein At4g25270, chloroplastic OS=Arabidopsis thaliana GN=PCMP-E53 PE=3 SV=1	Pentatricopeptide repeat-containing protein	GO:0009451//RNA modification;GO:0090305//nucleic acid phosphodiester bond hydrolysis;	GO:0043231//intracellular membrane-bounded organelle;	GO:0003723//RNA binding;GO:0004519//endonuclease activity;	ko00983(Drug metabolism - other enzymes);ko00240(Pyrimidine metabolism)
CsGy3G011830	14.4392	22.1375	6.74103	0.304508	-1.71545	0.0361652	0.414687	Chr3	9049362	9051331	-	672	-	-	-	-	-	-	Unknown Protein	-	-	-	-
CsGy3G029790	96.3925	136.683	56.1021	0.410454	-1.28471	0.036539	0.417821	Chr3	30100832	30103252	-	1662	-	GO:0004674;GO:0005524;GO:0006468;GO:0016021;GO:0030246;GO:0048544;	-	virNOG03326	T	sp|P17801|KPRO_MAIZE Putative receptor protein kinase ZmPK1 OS=Zea mays GN=PK1 PE=2 SV=2	putative receptor protein kinase ZmPK1	GO:0006468//protein phosphorylation;GO:0048544//recognition of pollen;	GO:0016021//integral component of membrane;	GO:0004674//protein serine/threonine kinase activity;GO:0005524//ATP binding;GO:0030246//carbohydrate binding;	-
CsGy4G008220	612.17	1075.07	149.268	0.138844	-2.84846	0.0366726	0.418377	Chr4	6199362	6202319	+	1029	-	GO:0002229;GO:0009620;GO:0009751;GO:0010150;GO:0033759;GO:0034785;GO:0042742;GO:0046872;GO:0051553;GO:0055114;	-	virNOG12867;virNOG03656	Q	sp|Q9FLV0|DMR6_ARATH Protein DOWNY MILDEW RESISTANCE 6 OS=Arabidopsis thaliana GN=DMR6 PE=1 SV=1	1-aminocyclopropane-1-carboxylate oxidase	GO:0002229//defense response to oomycetes;GO:0009620//response to fungus;GO:0009751//response to salicylic acid;GO:0010150//leaf senescence;GO:0042742//defense response to bacterium;GO:0051553//flavone biosynthetic process;GO:0055114//obsolete oxidation-reduction process;	-	GO:0033759//flavone synthase activity;GO:0034785//salicylate 5-hydroxylase activity;GO:0046872//metal ion binding;	-
CsGy1G031470	17.1526	25.6946	8.61052	0.33511	-1.57729	0.0370541	0.420855	Chr1	30378180	30380432	-	291	-	-	-	-	-	-	Unknown Protein	-	-	-	-
CsGy3G012210	16.8096	24.9985	8.62075	0.344851	-1.53596	0.0372077	0.421522	Chr3	9267500	9269193	-	980	-	GO:0005886;GO:0016021;	-	virNOG19636	S	sp|Q8L7R5|CSPLG_ARATH CASP-like protein 5B3 OS=Arabidopsis thaliana GN=At3g23200 PE=2 SV=1	CASP-like protein	-	GO:0005886//plasma membrane;GO:0016021//integral component of membrane;	-	-
CsGy6G033360	5.52973	11.0595	0	0	-Inf	0.0373512	0.421522	Chr6	30120712	30121646	+	513	-	GO:0004672;GO:0005524;GO:0006468;GO:0016021;	-	virNOG05235	T	sp|Q9T0J1|CRK26_ARATH Cysteine-rich receptor-like protein kinase 26 OS=Arabidopsis thaliana GN=CRK26 PE=2 SV=1	putative receptor-like protein kinase At4g00960	GO:0006468//protein phosphorylation;	GO:0016021//integral component of membrane;	GO:0004672//protein kinase activity;GO:0005524//ATP binding;	-
CsGy1G017280	73.8696	107.996	39.7435	0.36801	-1.44218	0.0375629	0.421522	Chr1	15515600	15516575	+	885	-	GO:0016491;GO:0046872;GO:0055114;	-	virNOG08227	Q	sp|O80449|DIOX4_ARATH Probable 2-oxoglutarate-dependent dioxygenase ANS OS=Arabidopsis thaliana GN=ANS PE=2 SV=1	2-oxoglutarate (2OG) and Fe(II)-dependent oxygenase superfamily protein	GO:0055114//obsolete oxidation-reduction process;	-	GO:0016491//oxidoreductase activity;GO:0046872//metal ion binding;	-
CsGy6G036080	19.4623	28.7558	10.1689	0.353628	-1.49969	0.0380915	0.422598	Chr6	31662243	31669050	+	3916	-	GO:0006281;GO:0046872;	K10683	virNOG40379;virNOG01641	L	sp|Q8RXD4|BRCA1_ARATH Protein BREAST CANCER SUSCEPTIBILITY 1 homolog OS=Arabidopsis thaliana GN=BRCA1 PE=1 SV=1	protein BREAST CANCER SUSCEPTIBILITY 1 homolog	GO:0006281//DNA repair;	-	GO:0046872//metal ion binding;	ko03440(Homologous recombination)
CsGy7G004140	966.807	1300.24	633.374	0.48712	-1.03765	0.0388856	0.426279	Chr7	3091715	3094911	-	1313	-	GO:0005576;GO:0016021;GO:0019953;	-	virNOG12057	R	sp|Q9M0I2|EXPB3_ARATH Expansin-B3 OS=Arabidopsis thaliana GN=EXPB3 PE=2 SV=2	expansin-B3-like	GO:0019953//sexual reproduction;	GO:0005576//extracellular region;GO:0016021//integral component of membrane;	-	-
CsGy1G005030	132.553	207.148	57.9583	0.279792	-1.83758	0.0389406	0.426279	Chr1	3395250	3398152	-	1143	-	GO:0000139;GO:0016021;GO:0016757;GO:0071555;	-	virNOG29257;virNOG10953	S	sp|P0C042|Y4597_ARATH Uncharacterized protein At4g15970 OS=Arabidopsis thaliana GN=At4g15970 PE=2 SV=1	Glycosyltransferase	GO:0071555//cell wall organization;	GO:0000139//Golgi membrane;GO:0016021//integral component of membrane;	GO:0016757//glycosyltransferase activity;	-
CsGy5G014130	40.1802	54.5256	25.8348	0.47381	-1.07762	0.0389879	0.426279	Chr5	19329526	19332699	+	3068	-	GO:0006004;GO:0016021;GO:0016757;	-	virNOG04623	R	sp|Q9SUF9|PP305_ARATH Pentatricopeptide repeat-containing protein At4g08210 OS=Arabidopsis thaliana GN=PCMP-E100 PE=3 SV=1	Pentatricopeptide repeat-containing family protein	GO:0006004//fucose metabolic process;	GO:0016021//integral component of membrane;	GO:0016757//glycosyltransferase activity;	-
CsGy3G031640	12.9839	20.1338	5.834	0.289761	-1.78706	0.040063	0.431801	Chr3	31130030	31134496	+	3154	-	GO:0003676;GO:0004386;GO:0005524;	K18655	virNOG09460	A	sp|Q93ZG7|RH38_ARATH DEAD-box ATP-dependent RNA helicase 38 OS=Arabidopsis thaliana GN=RH38 PE=1 SV=2	DEAD-box ATP-dependent RNA helicase 38	-	-	GO:0003676//nucleic acid binding;GO:0004386//helicase activity;GO:0005524//ATP binding;	ko03015(mRNA surveillance pathway);ko03013(Nucleocytoplasmic transport)
CsGy5G005460	23.1627	33.1342	13.1913	0.398119	-1.32873	0.0403729	0.433572	Chr5	3528640	3540391	+	3777	-	GO:0004674;GO:0005524;GO:0006468;GO:0009826;	-	virNOG07290	T	sp|Q9LE81|IRE_ARATH Probable serine/threonine protein kinase IRE OS=Arabidopsis thaliana GN=IRE PE=2 SV=1	probable serine/threonine protein kinase IRE	GO:0006468//protein phosphorylation;GO:0009826//unidimensional cell growth;	-	GO:0004674//protein serine/threonine kinase activity;GO:0005524//ATP binding;	-
CsGy3G005410	27498.7	37258.1	17739.2	0.476118	-1.07061	0.0406751	0.435169	Chr3	4320697	4322994	-	1766	-	GO:0005829;GO:0006950;GO:0009228;GO:0009570;GO:0046872;GO:0052837;	K03146	virNOG05676	R	sp|O23787|THI4_CITSI Thiamine thiazole synthase, chloroplastic OS=Citrus sinensis GN=THI1 PE=2 SV=1	Thiamine thiazole synthase, chloroplastic	GO:0006950//response to stress;GO:0009228//thiamine biosynthetic process;GO:0052837//thiazole biosynthetic process;	GO:0005829//cytosol;GO:0009570//chloroplast stroma;	GO:0046872//metal ion binding;	ko00730(Thiamine metabolism)
CsGy5G009050	496.638	679.117	314.159	0.462599	-1.11217	0.0406898	0.435169	Chr5	7096503	7102663	-	3982	-	GO:0001172;GO:0003723;GO:0003968;GO:0031047;	K11699	virNOG00315	A	sp|Q9LQV2|RDR1_ARATH RNA-dependent RNA polymerase 1 OS=Arabidopsis thaliana GN=RDR1 PE=2 SV=1	RNA-dependent RNA polymerase	GO:0001172//transcription, RNA-templated;GO:0031047//gene silencing by RNA;	-	GO:0003723//RNA binding;GO:0003968//RNA-directed 5'-3' RNA polymerase activity;	-
CsGy4G016740	6.87686	11.8927	1.86098	0.15648	-2.67595	0.0411286	0.438568	Chr4	21750139	21754819	-	1302	-	-	-	-	-	-	Unknown Protein	-	-	-	-
CsGy6G005630	7.53194	12.8163	2.24758	0.175369	-2.51154	0.0423042	0.445854	Chr6	5085722	5087396	-	1457	-	GO:0009416;GO:0009686;GO:0009740;GO:0009826;GO:0009908;GO:0016707;GO:0045544;GO:0046872;GO:0055114;	K05282	virNOG16188	Q	sp|Q39110|GAOX1_ARATH Gibberellin 20 oxidase 1 OS=Arabidopsis thaliana GN=GA20OX1 PE=2 SV=2	gibberellin 20 oxidase 1-like	GO:0009416//response to light stimulus;GO:0009686//gibberellin biosynthetic process;GO:0009740//gibberellic acid mediated signaling pathway;GO:0009826//unidimensional cell growth;GO:0009908//flower development;GO:0055114//obsolete oxidation-reduction process;	-	GO:0016707//gibberellin 3-beta-dioxygenase activity;GO:0045544//gibberellin 20-oxidase activity;GO:0046872//metal ion binding;	ko00904(Diterpenoid biosynthesis)
CsGy6G022170	61.3673	83.8456	38.889	0.463817	-1.10837	0.0424615	0.446113	Chr6	22691254	22692204	-	294	-	-	-	virNOG25683	S	sp|Q9LXR7|PAR2_ARATH Transcription factor PAR2 OS=Arabidopsis thaliana GN=PAR2 PE=3 SV=1	Unknown Protein	-	-	-	-
CsGy1G011560	23.8644	33.9022	13.8265	0.407835	-1.29394	0.0425282	0.446244	Chr1	7245418	7247134	-	821	-	-	-	virNOG34172;virNOG11063	R	sp|Q9XFK7|MFT_ARATH Protein MOTHER of FT and TFL1 OS=Arabidopsis thaliana GN=MFT PE=1 SV=1	protein MOTHER of FT and TFL1-like	-	-	-	-
CsGy3G014590	50.8794	69.1152	32.6435	0.472306	-1.08221	0.0434365	0.451563	Chr3	10757929	10760710	-	2329	-	-	-	virNOG00019	S	sp|Q6A070|TGRM1_MOUSE TOG array regulator of axonemal microtubules protein 1 OS=Mus musculus GN=Togaram1 PE=1 SV=3	Armadillo-like helical	-	-	-	-
CsGy3G015680	94.2782	137.733	50.8236	0.369002	-1.4383	0.0436421	0.452067	Chr3	11562771	11569344	-	3808	-	GO:0043531;	K15078	KOG4658;virNOG14993	T	sp|Q7XA40|RGA3_SOLBU Putative disease resistance protein RGA3 OS=Solanum bulbocastanum GN=RGA3 PE=2 SV=2	putative disease resistance protein RGA3	-	-	GO:0043531//ADP binding;	ko03460(Fanconi anemia pathway)
CsGy6G007780	6.0162	12.0324	0	0	-Inf	0.0437558	0.452726	Chr6	6516376	6520157	-	1718	-	GO:0005783;GO:0005886;GO:0010155;	-	-	-	-	proton pump-interactor 2-like isoform X2	GO:0010155//regulation of proton transport;	GO:0005783//endoplasmic reticulum;GO:0005886//plasma membrane;	-	-
CsGy4G017670	25.7326	49.5236	1.94152	0.0392039	-4.67286	0.0438378	0.453136	Chr4	22807836	22809973	+	1721	-	GO:0008152;GO:0016758;	K13495	virNOG03646	CG	sp|P56725|ZOX_PHAVU Zeatin O-xylosyltransferase OS=Phaseolus vulgaris GN=ZOX1 PE=2 SV=1	Glycosyltransferase	GO:0008152//metabolic process;	-	GO:0016758//hexosyltransferase activity;	ko00908(Zeatin biosynthesis)
CsGy4G002770	15.753	25.2185	6.28751	0.249321	-2.00392	0.0439344	0.453538	Chr4	1776435	1782066	-	2062	-	GO:0004672;GO:0005509;GO:0005524;GO:0006468;	K13412	virNOG15936	T	sp|Q6NLQ6|CDPKW_ARATH Calcium-dependent protein kinase 32 OS=Arabidopsis thaliana GN=CPK32 PE=1 SV=1	calcium-dependent protein kinase 24	GO:0006468//protein phosphorylation;	-	GO:0004672//protein kinase activity;GO:0005509//calcium ion binding;GO:0005524//ATP binding;	ko05145(Toxoplasmosis);ko04626(Plant-pathogen interaction)
CsGy3G036600	86.0391	128.318	43.7603	0.341031	-1.55203	0.0442046	0.455031	Chr3	34671280	34674686	+	1576	-	GO:0015267;GO:0016021;GO:0055085;	K09874	virNOG12510	G	sp|Q19KC1|NIP21_MAIZE Aquaporin NIP2-1 OS=Zea mays GN=NIP2-1 PE=2 SV=2	aquaporin NIP2-1-like	GO:0055085//transmembrane transport;	GO:0016021//integral component of membrane;	GO:0015267//channel activity;	-
CsGy6G027990	17.5391	26.0793	8.99883	0.345056	-1.5351	0.0458627	0.462121	Chr6	27006012	27006572	+	561	-	GO:0003676;	-	virNOG16987;virNOG17775;virNOG20447	R	sp|Q39263|ZFP4_ARATH Zinc finger protein 4 OS=Arabidopsis thaliana GN=ZFP4 PE=2 SV=2	zinc finger protein 7-like	-	-	GO:0003676//nucleic acid binding;	-
CsGy3G030160	28.9165	40.4226	17.4104	0.430711	-1.21521	0.0460467	0.462946	Chr3	30280052	30284264	+	2422	-	GO:0003777;GO:0005524;GO:0005871;GO:0005874;GO:0007018;GO:0008017;GO:0009507;GO:0016887;	K10403	virNOG12929	Z	sp|Q5E913|KN10B_ARATH Kinesin-like protein KIN-10B OS=Arabidopsis thaliana GN=KIN10B PE=2 SV=1	Kinesin-like protein	GO:0007018//microtubule-based movement;	GO:0005871//kinesin complex;GO:0005874//microtubule;GO:0009507//chloroplast;	GO:0003777//microtubule motor activity;GO:0005524//ATP binding;GO:0008017//microtubule binding;GO:0016887//ATP hydrolysis activity;	ko04914(Progesterone-mediated oocyte maturation)
CsGy5G028760	78.5351	113.796	43.2742	0.380279	-1.39487	0.0463953	0.463623	Chr5	32298721	32299290	+	336	-	-	-	virNOG26604;virNOG24848	S	-	transcription factor UPBEAT-like protein	-	-	-	-
CsGy7G017130	196.724	269.856	123.592	0.457992	-1.12661	0.0471761	0.465011	Chr7	20505980	20511616	+	1546	-	GO:0004672;GO:0005524;GO:0006468;	K13436	virNOG04214	T	sp|O80719|Y2706_ARATH Probable receptor-like protein kinase At2g47060 OS=Arabidopsis thaliana GN=At2g47060 PE=1 SV=1	Protein kinase superfamily protein	GO:0006468//protein phosphorylation;	-	GO:0004672//protein kinase activity;GO:0005524//ATP binding;	ko04626(Plant-pathogen interaction)
CsGy3G003110	32.8109	45.1057	20.5161	0.454844	-1.13656	0.0475999	0.467408	Chr3	2537773	2538485	-	627	-	-	-	-	-	-	Uncharacterized protein	-	-	-	-
CsGy4G012680	22.3488	32.0935	12.6041	0.392731	-1.34839	0.0476422	0.46757	Chr4	17966498	17968568	-	1775	-	GO:0016021;	-	virNOG02717	S	sp|Q9NWC5|TM45A_HUMAN Transmembrane protein 45A OS=Homo sapiens GN=TMEM45A PE=1 SV=1	transmembrane protein 45B-like	-	GO:0016021//integral component of membrane;	-	-
CsGy5G016170	16.5766	24.7425	8.4107	0.339929	-1.5567	0.0482645	0.469898	Chr5	22546995	22549128	+	1022	-	GO:0016021;GO:0046872;	-	virNOG04508;virNOG09417	O	-	RING/U-box superfamily protein	-	GO:0016021//integral component of membrane;	GO:0046872//metal ion binding;	-
CsGy5G024710	36.0896	48.8687	23.3104	0.477001	-1.06794	0.0486701	0.471023	Chr5	29253062	29262119	+	4096	-	GO:0005634;	-	virNOG07531	R	-	Histone-lysine N-methyltransferase ATX1, putative isoform 1	-	GO:0005634//nucleus;	-	-
CsGy5G000620	7.33538	12.4215	2.24928	0.18108	-2.4653	0.0487858	0.471639	Chr5	359621	360427	-	807	-	GO:0003677;GO:0003700;GO:0005634;GO:0006355;	-	virNOG20121;virNOG10717	K	sp|Q9SUE3|CRF4_ARATH Ethylene-responsive transcription factor CRF4 OS=Arabidopsis thaliana GN=CRF4 PE=1 SV=2	ethylene-responsive transcription factor CRF1-like	GO:0006355//regulation of transcription, DNA-templated;	GO:0005634//nucleus;	GO:0003677//DNA binding;GO:0003700//DNA-binding transcription factor activity;	-
CsGy2G026440	4.51628	8.33309	0.699471	0.0839391	-3.57451	0.0498383	0.476727	Chr2	34063530	34065307	-	1179	-	GO:0000287;GO:0008152;GO:0010333;	K15803	virNOG05092;NOG126252	SR	sp|B9SCB6|TPS2_RICCO Probable terpene synthase 2 OS=Ricinus communis GN=TPS2 PE=3 SV=1	probable terpene synthase 2 isoform X2	GO:0008152//metabolic process;	-	GO:0000287//magnesium ion binding;GO:0010333//terpene synthase activity;	ko00909(Sesquiterpenoid and triterpenoid biosynthesis)
CsGy7G017250	36.7252	49.2149	24.2354	0.49244	-1.02198	0.0499026	0.476838	Chr7	20613237	20617377	+	1896	-	GO:0004185;GO:0005773;GO:0006508;GO:0009505;	K16297	virNOG07909	O	sp|Q0WPR4|SCP34_ARATH Serine carboxypeptidase-like 34 OS=Arabidopsis thaliana GN=SCPL34 PE=2 SV=2	Carboxypeptidase	GO:0006508//proteolysis;	GO:0005773//vacuole;GO:0009505//plant-type cell wall;	GO:0004185//serine-type carboxypeptidase activity;	-
